# Supplementary material for: 1,2,3-Triazol-5-ylidene- vs. 1,2,3-triazole-based tricarbonylrhenium(i) complexes: influence of a mesoionic carbene ligand on the electronic and biological properties
Source: Royal Society of Chemistry journal article supplement (doi:10.1039/d4dt00922c), 2024-01-01
Supplement: d4dt00922c1.pdf [file d4dt00922c1.pdf]

## Electronic Supplementary Information

### 1,2,3-triazol-5-ylidene- vs 1,2,3-triazole-based tricarbonylrhenium(I) complexes: Influence of a mesoionic carbene ligand on the electronic and biological properties

Corinne Vanucci-Bacqué, Mariusz Wolff, Béatrice Delavaux-Nicot, Abanoub Mosaad Abdallah, Sonia Mallet-Ladeira, Charles-Louis Serpentine, Florence Bedos-Belval, Kar Wai Fong, Xiao Ying Ng, May Lee Low, Eric Benoist\* and Suzanne Fery-Forgues\*

#### Synthesis and chemical characterization

|                                                                                                                            |    |
|----------------------------------------------------------------------------------------------------------------------------|----|
| Figure S1. <sup>1</sup> H NMR spectrum of <b>Re-T-Phe</b> in DMSO- <i>d</i> <sub>6</sub> .....                             | 3  |
| Figure S2. <sup>13</sup> C Jmod NMR and HSQC spectra of <b>Re-T-Phe</b> in DMSO- <i>d</i> <sub>6</sub> .....               | 4  |
| Figure S3. <sup>1</sup> H NMR and <sup>13</sup> C Jmod NMR spectra of <b>Re-T-Tol</b> in DMSO- <i>d</i> <sub>6</sub> ..... | 5  |
| Figure S4. HSQC spectra of <b>Re-T-Tol</b> in DMSO- <i>d</i> <sub>6</sub> .....                                            | 6  |
| Figure S5. <sup>1</sup> H NMR spectrum of <b>Re-T-BOP</b> in DMSO- <i>d</i> <sub>6</sub> .....                             | 6  |
| Figure S6. <sup>13</sup> C Jmod NMR and HSQC spectra of <b>Re-T-BOP</b> in DMSO- <i>d</i> <sub>6</sub> .....               | 7  |
| Figure S7. <sup>1</sup> H NMR and <sup>13</sup> C Jmod NMR spectra of <b>Re-Tol</b> in DMSO- <i>d</i> <sub>6</sub> .....   | 8  |
| Figure S8. HSQC spectra of <b>Re-Tol</b> in DMSO- <i>d</i> <sub>6</sub> .....                                              | 9  |
| Figure S9. HRMS data for <b>Re-T-Phe</b> .....                                                                             | 9  |
| Figure S10. HRMS data for <b>Re-T-Tol</b> .....                                                                            | 10 |
| Figure S11. HRMS data for <b>Re-T-BOP</b> .....                                                                            | 10 |
| Figure S12. HRMS data for <b>Re-Tol</b> .....                                                                              | 11 |
| Figure S13. ATR FTIR spectrum of complex <b>Re-T-Phe</b> and <b>Re-T-Tol</b> .....                                         | 12 |
| Figure S14. ATR FTIR spectrum of complexes <b>Re-T-BOP</b> and <b>Re-Tol</b> .....                                         | 13 |
| Table S1. FT-IR data for all complexes as microcrystalline powders .....                                                   | 13 |

#### Crystallographic data

|                                                                                                                                                                                                                       |    |
|-----------------------------------------------------------------------------------------------------------------------------------------------------------------------------------------------------------------------|----|
| Table S2. Selected crystallographic data of pyridyl-triazolylidene-based complexes <b>Re-T-Phe</b> , <b>Re-T-Tol</b> and <b>Re-T-BOP</b> , and pyridyl-triazole-based complexes <b>Re-Phe</b> and <b>Re-Tol</b> ..... | 14 |
| Table S3. Selected bond lengths of the complexes .....                                                                                                                                                                | 15 |
| Table S4. Selected angles of the complexes .....                                                                                                                                                                      | 16 |
| Table S5. Octahedral distortion parameters for <b>Re-Phe</b> , <b>Re-Tol</b> , <b>Re-T-Phe</b> and <b>Re-T-Tol</b> .....                                                                                              | 17 |
| Table S6. Short contacts detected in structures of <b>Re-Phe</b> , <b>Re-Tol</b> , <b>Re-T-Phe</b> and <b>Re-T-Tol</b> .....                                                                                          | 17 |
| Table S7. Geometrical parameters for C–H···π interactions detected in <b>Re-Phe</b> , <b>Re-T-Phe</b> and <b>Re-T-Tol</b> .....                                                                                       | 17 |
| Table S8. Geometrical parameters for π···π interactions detected in <b>Re-Tol</b> , <b>Re-T-Phe</b> and <b>Re-T-Tol</b> .....                                                                                         | 18 |
| Figure S15. One-dimensional chain of <b>Re-T-Phe</b> showing intermolecular C–H···O interactions along the <i>c</i> axis .....                                                                                        | 18 |
| Figure S16. C–H···π and π–π interactions in complexes <b>Re-T-Phe</b> .....                                                                                                                                           | 18 |
| Figure S17. One-dimensional chain of <b>Re-T-Tol</b> showing intermolecular C–H···Cl interactions along the <i>c</i> axis .....                                                                                       | 19 |
| Figure S18. C–H···π and π–π interactions in complex <b>Re-T-Tol</b> .....                                                                                                                                             | 19 |
| Figure S19. One-dimensional zig-zag chain of <b>Re-Phe</b> .....                                                                                                                                                      | 19 |
| Figure S20. Two dimensional network of <b>Re-Phe</b> showing intermolecular C–H···Cl interactions in the <i>ac</i> plane .....                                                                                        | 20 |
| Figure S21. C–H···π interactions in <b>Re-Phe</b> .....                                                                                                                                                               | 20 |
| Figure S22. One-dimensional chain of <b>Re-Tol</b> showing intermolecular C–H···Cl interactions along the <i>c</i> axis .....                                                                                         | 21 |
| Figure S23. Two dimensional network of <b>Re-Tol</b> showing the intermolecular C–H···O interactions in the <i>ab</i> plane .....                                                                                     | 21 |
| Figure S24. π <sub>(trz)</sub> ···π <sub>(py)</sub> interactions in <b>Re-Tol</b> .....                                                                                                                               | 22 |
| Figure S25. Crystal packing of <b>Re-T-Phe</b> , <b>Re-T-Tol</b> , <b>Re-Phe</b> and <b>Re-Tol</b> .....                                                                                                              | 22 |
| Figure S26. Hirshfeld surfaces plotted over the normalized contact distance ( <i>d</i> <sub>norm</sub> ), shape index, and curvedness .....                                                                           | 23 |
| Figure S27. Two-dimensional fingerprint plots for interactions in crystal packing of <b>Re-Phe</b> .....                                                                                                              | 24 |
| Figure S28. Two-dimensional fingerprint plots for interactions in crystal packing of <b>Re-Tol</b> .....                                                                                                              | 25 |
| Figure S29. Two-dimensional fingerprint plots for interactions in crystal packing of <b>Re-T-Phe</b> .....                                                                                                            | 26 |
| Figure S30. Two-dimensional fingerprint plots for interactions in crystal packing of <b>Re-T-Tol</b> .....                                                                                                            | 27 |

#### Calculations

|                                                                                                                           |    |
|---------------------------------------------------------------------------------------------------------------------------|----|
| Table S9. Calculated bond lengths and angles in the ground, singlet and triplet excited states for <b>Re-Tol</b> .....    | 28 |
| Table S10. Calculated bond lengths and angles in the ground, singlet and triplet excited states for <b>Re-T-Tol</b> ..... | 29 |
| Table S11. Calculated bond lengths and angles in the ground, singlet and triplet excited states for <b>Re-T-BOP</b> ..... | 30 |

|                                                                                                                                                                                                                                                |    |
|------------------------------------------------------------------------------------------------------------------------------------------------------------------------------------------------------------------------------------------------|----|
| <b>Figure S31.</b> DFT-optimized structure of <b>Re-T-BOP</b> .....                                                                                                                                                                            | 30 |
| <b>Table S12.</b> Dihedral angle values between the triazole or triazolylidene ring and R calculated using DFT for the ground state, and first singlet and triplet excited states of <b>Re-Tol</b> , <b>Re-T-Tol</b> and <b>Re-T-BOP</b> ..... | 31 |
| <b>Table S13.</b> The frontier molecular orbital compositions and energy levels for <b>Re-Tol</b> (in gas phase) .....                                                                                                                         | 31 |
| <b>Table S14.</b> The frontier molecular orbital compositions and energy levels for <b>Re-Tol</b> (in DCM) .....                                                                                                                               | 31 |
| <b>Table S15.</b> The frontier molecular orbital compositions and energy levels for <b>Re-T-Tol</b> (in gas phase) .....                                                                                                                       | 32 |
| <b>Table S16.</b> The frontier molecular orbital compositions and energy levels for <b>Re-T-Tol</b> (in DCM) .....                                                                                                                             | 32 |
| <b>Table S17.</b> The frontier molecular orbital compositions and energy levels for <b>Re-T-BOP</b> (in gas phase) .....                                                                                                                       | 33 |
| <b>Table S18.</b> The frontier molecular orbital compositions and energy levels for <b>Re-T-BOP</b> (in DCM) .....                                                                                                                             | 33 |
| <b>Table S19.</b> The main electronic transitions for <b>Re-Tol</b> , calculated with TDDFT method (in gas phase) .....                                                                                                                        | 34 |
| <b>Table S20.</b> The main electronic transitions for <b>Re-Tol</b> , calculated with TDDFT method (in DCM) .....                                                                                                                              | 34 |
| <b>Table S21.</b> The main electronic transitions for <b>Re-T-Tol</b> calculated with TDDFT method (in gas phase) .....                                                                                                                        | 35 |
| <b>Table S22.</b> The main electronic transitions for <b>Re-T-Tol</b> calculated with TDDFT method (in DCM) .....                                                                                                                              | 35 |
| <b>Table S23.</b> The main electronic transitions for <b>Re-T-BOP</b> calculated with TDDFT method (in gas phase) .....                                                                                                                        | 36 |
| <b>Table S24.</b> The main electronic transitions for <b>Re-T-BOP</b> calculated with TDDFT method (in DCM) .....                                                                                                                              | 36 |
| <b>Table S25.</b> The frontier molecular orbital compositions and energy levels for <b>Re-BOP</b> (in DCM) .....                                                                                                                               | 37 |
| <b>Table S26.</b> The main electronic transitions for <b>Re-BOP</b> , calculated with TDDFT method (in DCM) .....                                                                                                                              | 37 |
| <b>Table S27.</b> Phosphorescence emission energies of <b>Re-Tol</b> , <b>Re-T-Tol</b> and <b>Re-T-BOP</b> .....                                                                                                                               | 37 |
| <b>Table S28.</b> Natural populations of the orbitals of the central atom in <b>Re-Tol</b> , <b>Re-T-Tol</b> and <b>Re-T-BOP</b> .....                                                                                                         | 38 |
| <b>Table S29.</b> Natural Population Analysis (NPA) for <b>Re-Tol</b> , <b>Re-T-Tol</b> , <b>Re-T-BOP</b> .....                                                                                                                                | 38 |
| <b>Table S30.</b> Frontier molecular orbital descriptors of complexes <b>Re-Tol</b> , <b>Re-T-Tol</b> , <b>Re-T-BOP</b> and <b>Re-BOP</b> .....                                                                                                | 38 |
| <b>Figure S32.</b> The isodensity plots of the frontier molecular orbitals of <b>Re-Tol</b> (in gas phase) .....                                                                                                                               | 39 |
| <b>Figure S33.</b> The isodensity plots of the frontier molecular orbitals of <b>Re-Tol</b> (in DCM) .....                                                                                                                                     | 40 |
| <b>Figure S34.</b> The isodensity plots of the frontier molecular orbitals of <b>Re-T-Tol</b> (in gas phase) .....                                                                                                                             | 41 |
| <b>Figure S35.</b> The isodensity plots of the frontier molecular orbitals of <b>Re-T-Tol</b> (in DCM) .....                                                                                                                                   | 42 |
| <b>Figure S36.</b> The isodensity plots of the frontier molecular orbitals of <b>Re-T-BOP</b> (in gas phase) .....                                                                                                                             | 43 |
| <b>Figure S37.</b> The isodensity plots of the frontier molecular orbitals of <b>Re-T-BOP</b> (in DCM) .....                                                                                                                                   | 44 |
| <b>Figure S38.</b> The isodensity plots of the frontier molecular orbitals of complex <b>Re-BOP</b> (in DCM) .....                                                                                                                             | 45 |
| <b>Figure S39.</b> Spin density distribution for the lowest triplet state $T_1$ of <b>Re-Tol</b> , <b>Re-T-Tol</b> and <b>Re-T-BOP</b> .....                                                                                                   | 46 |
| <b>Figure S40.</b> Molecular Electrostatic Potential (MEP) of <b>Re-Tol</b> , <b>Re-T-Tol</b> and <b>Re-T-BOP</b> .....                                                                                                                        | 46 |
| <b>Figure S41.</b> Experimental and simulated UV-Vis and FT-IR spectra of <b>Re-Tol</b> , <b>Re-T-Tol</b> , and <b>Re-T-BOP</b> .....                                                                                                          | 47 |

### Electrochemistry

|                                                                                                                                                                                      |    |
|--------------------------------------------------------------------------------------------------------------------------------------------------------------------------------------|----|
| <b>Table S31.</b> Experimental electrochemical data used, and calculated values of the energy gaps ( $E_g$ ) .....                                                                   | 48 |
| <b>Figure S42.</b> OSWVs: anodic and cathodic scans of complex <b>Re-Tol</b> .....                                                                                                   | 49 |
| <b>Figure S43.</b> Cyclic voltammograms of <b>Re-Tol</b> , and of its first oxidation and reduction processes at 0.2 V/s .....                                                       | 49 |
| <b>Figure S44.</b> Cyclic voltammograms of the first oxidation process of <b>Re-Tol</b> at 10, 50, and 100 V/s, and of its first reduction process at 10, 50, and 100 V/s .....      | 49 |
| <b>Figure S45.</b> OSWVs: anodic and cathodic scans of complex <b>Re-T-Tol</b> .....                                                                                                 | 50 |
| <b>Figure S46.</b> Cyclic voltammograms of <b>Re-T-Tol</b> , and of its first oxidation and reduction processes at 0.2 and 10 V/s .....                                              | 50 |
| <b>Figure S47.</b> Cyclic voltammograms of the first oxidation process of <b>Re-T-Tol</b> at 10, 50, and 100 V/s, and of its first reduction process at 1, 5, and 10 V/s .....       | 50 |
| <b>Figure S48.</b> OSWVs: anodic and cathodic scans of complex <b>Re-T-BOP</b> .....                                                                                                 | 51 |
| <b>Figure S49.</b> Cyclic voltammograms of complex <b>Re-T-BOP</b> .....                                                                                                             | 51 |
| <b>Figure S50.</b> Cyclic voltammograms of the first oxidation process of <b>Re-T-BOP</b> at 10, 50, and 100 V/s, and of its first reduction process at 1, 10, 50, and 100 V/s ..... | 51 |

### Spectroscopy

|                                                                                                                                                  |    |
|--------------------------------------------------------------------------------------------------------------------------------------------------|----|
| <b>Figure S51.</b> Emission decays of <b>Re-T-Phe</b> , <b>Re-T-Tol</b> , <b>Re-T-BOP</b> , <b>Re-Phe</b> , and <b>Re-Tol</b> in DCM .....       | 52 |
| <b>Figure S52.</b> Emission decays of <b>Re-T-Phe</b> , <b>Re-T-Tol</b> , <b>Re-T-BOP</b> , <b>Re-Phe</b> and <b>Re-Tol</b> in solid state ..... | 53 |

### Microbiology

|                                                                                                                                                                                                                                |    |
|--------------------------------------------------------------------------------------------------------------------------------------------------------------------------------------------------------------------------------|----|
| <b>Table S32</b> Minimum inhibitory concentration (MIC) of the complexes towards antibiotic-susceptible (S) and multidrug-resistant (R) bacteria, with irradiation by UV light. Comparison with conventional antibiotics ..... | 53 |
|--------------------------------------------------------------------------------------------------------------------------------------------------------------------------------------------------------------------------------|----|

## Calculations (Annex)

|                                                                                                |    |
|------------------------------------------------------------------------------------------------|----|
| <b>Table S33.</b> Cartesian coordinates of <b>Re-Tol</b> in $S_0$ (in gas phase) .....         | 54 |
| <b>Table S34.</b> Cartesian coordinates of <b>Re-Tol</b> in $T_1$ (in gas phase) .....         | 54 |
| <b>Table S35.</b> Cartesian coordinates of <b>Re-Tol</b> in $S_0$ (in dichloromethane) .....   | 54 |
| <b>Table S36.</b> Cartesian coordinates of <b>Re-Tol</b> in $S_1$ (in dichloromethane) .....   | 55 |
| <b>Table S37.</b> Cartesian coordinates of <b>Re-Tol</b> in $T_1$ (in dichloromethane) .....   | 55 |
| <b>Table S38.</b> Cartesian coordinates of <b>Re-T-Tol</b> in $S_0$ (in gas phase) .....       | 55 |
| <b>Table S39.</b> Cartesian coordinates of <b>Re-T-Tol</b> in $T_1$ (in gas phase) .....       | 56 |
| <b>Table S40.</b> Cartesian coordinates of <b>Re-T-Tol</b> in $S_0$ (in dichloromethane) ..... | 56 |
| <b>Table S41.</b> Cartesian coordinates of <b>Re-T-Tol</b> in $S_1$ (in dichloromethane) ..... | 56 |
| <b>Table S42.</b> Cartesian coordinates of <b>Re-T-Tol</b> in $T_1$ (in dichloromethane) ..... | 57 |
| <b>Table S43.</b> Cartesian coordinates of <b>Re-T-BOP</b> in $S_0$ (in gas phase) .....       | 57 |
| <b>Table S44.</b> Cartesian coordinates of <b>Re-T-BOP</b> in $T_1$ (in gas phase) .....       | 57 |
| <b>Table S45.</b> Cartesian coordinates of <b>Re-T-BOP</b> in $S_0$ (in dichloromethane) ..... | 58 |
| <b>Table S46.</b> Cartesian coordinates of <b>Re-T-BOP</b> in $S_1$ (in dichloromethane) ..... | 58 |
| <b>Table S47.</b> Cartesian coordinates of <b>Re-T-BOP</b> in $T_1$ (in dichloromethane) ..... | 58 |

## Synthesis and chemical characterization

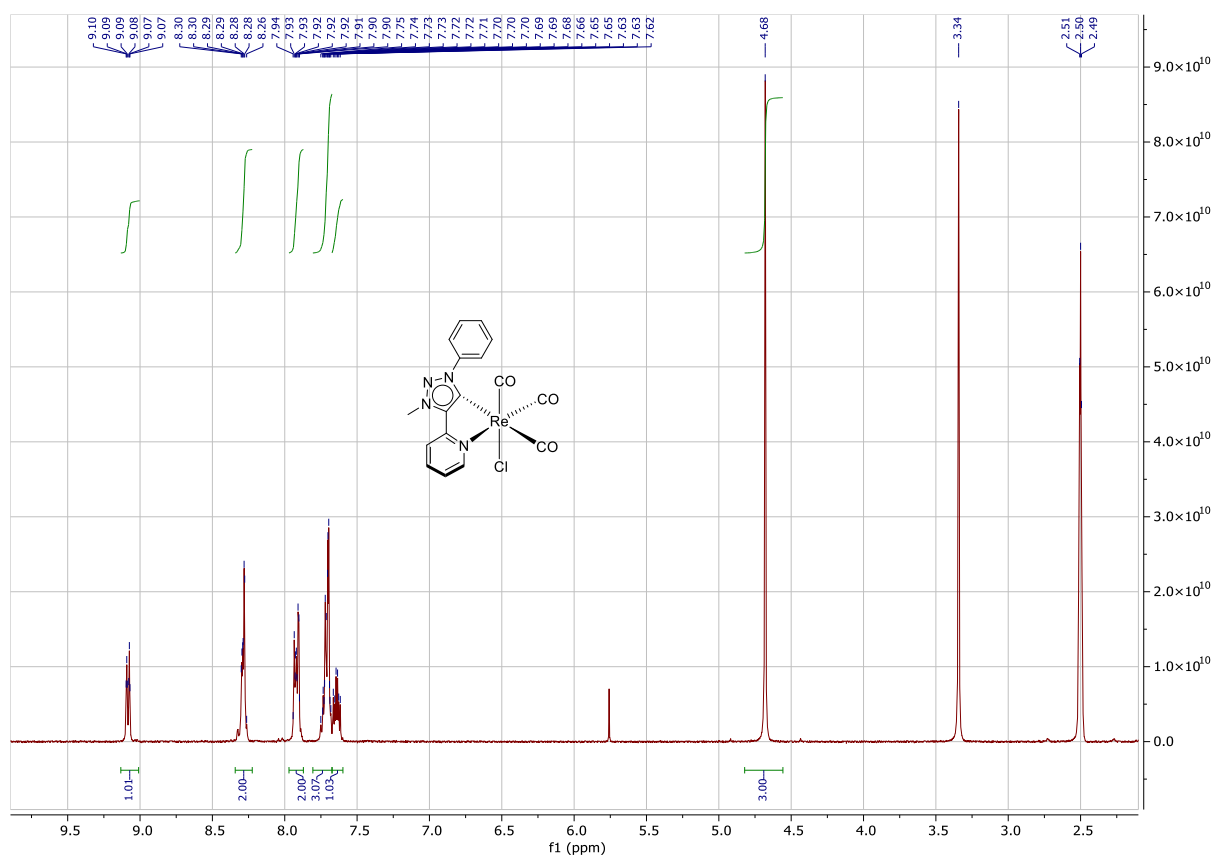

**Figure S1.**  $^1\text{H}$  NMR spectrum of complex **Re-T-Phe** in  $\text{DMSO-}d_6$ .

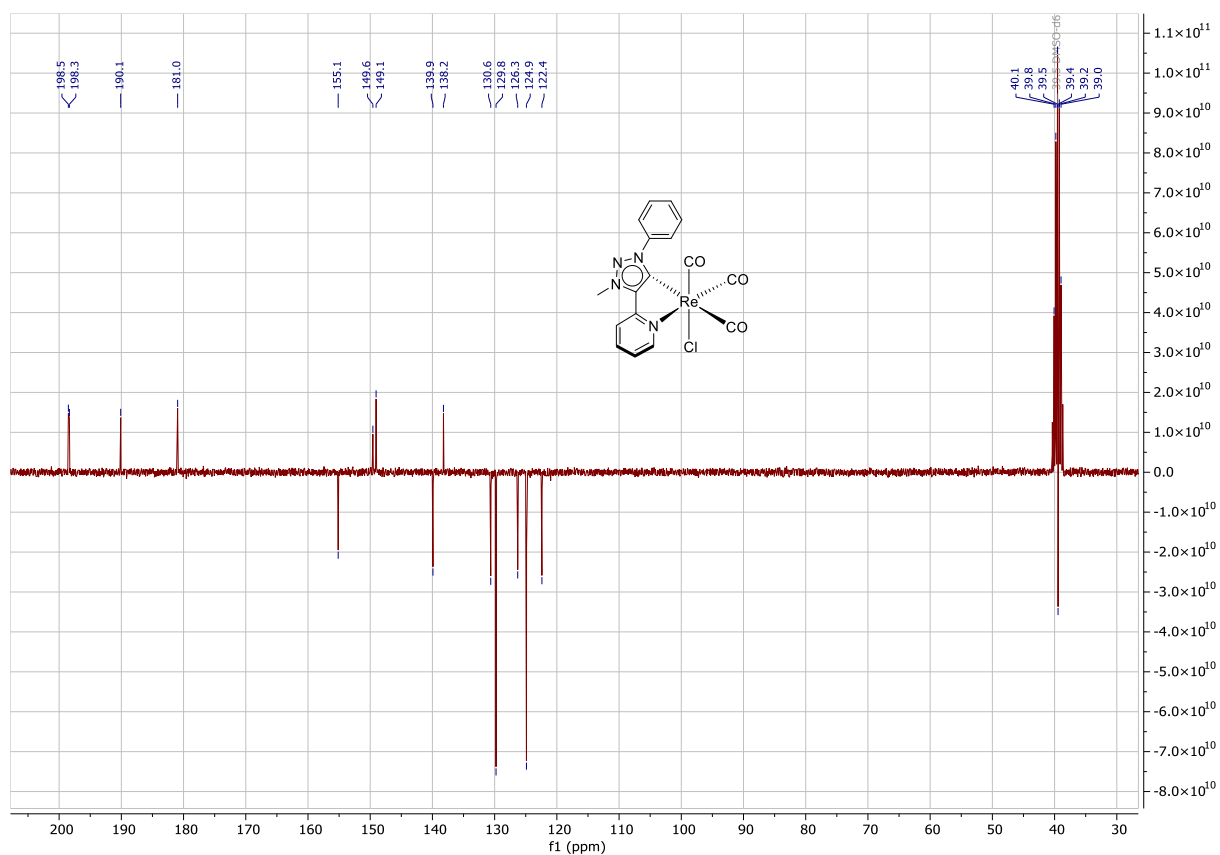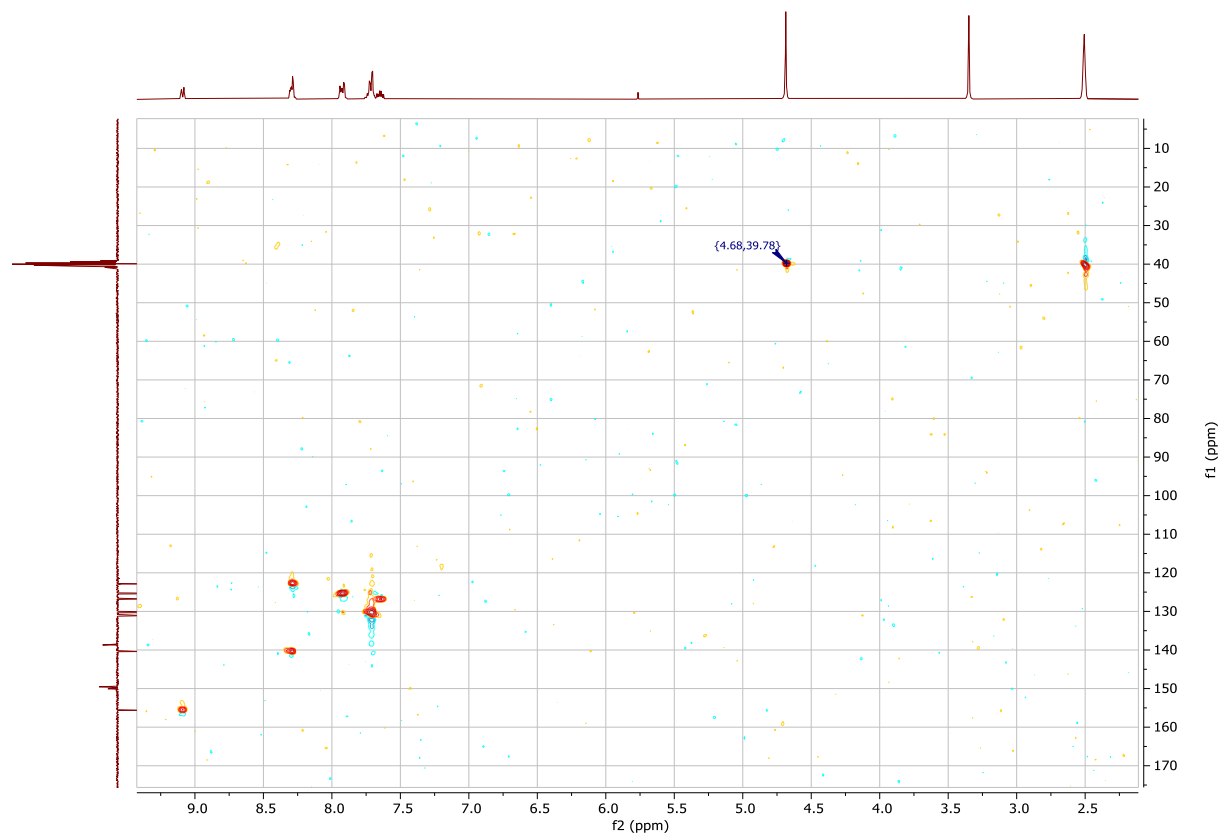

**Figure S2.**  $^{13}\text{C}$  Jmod NMR (top) and HSQC (bottom) spectra of complex **Re-T-Phe** in  $\text{DMSO-}d_6$ .

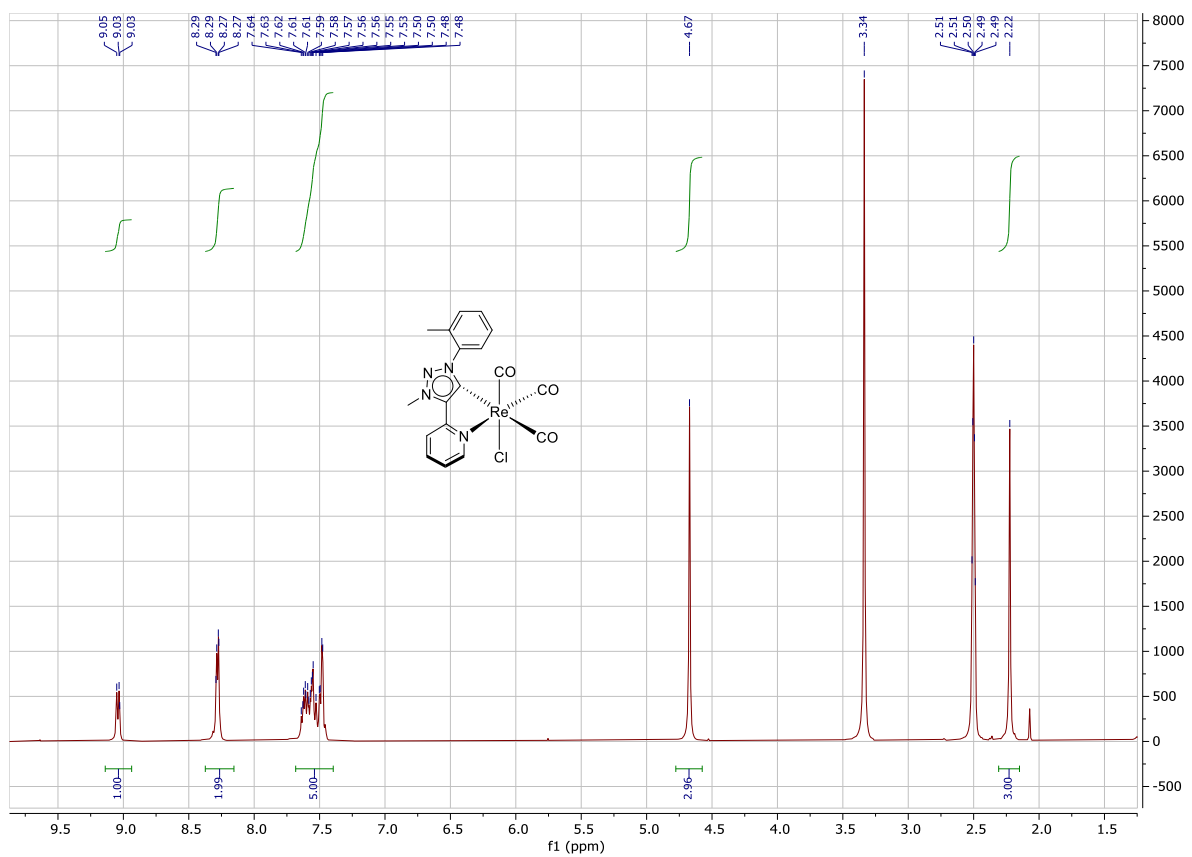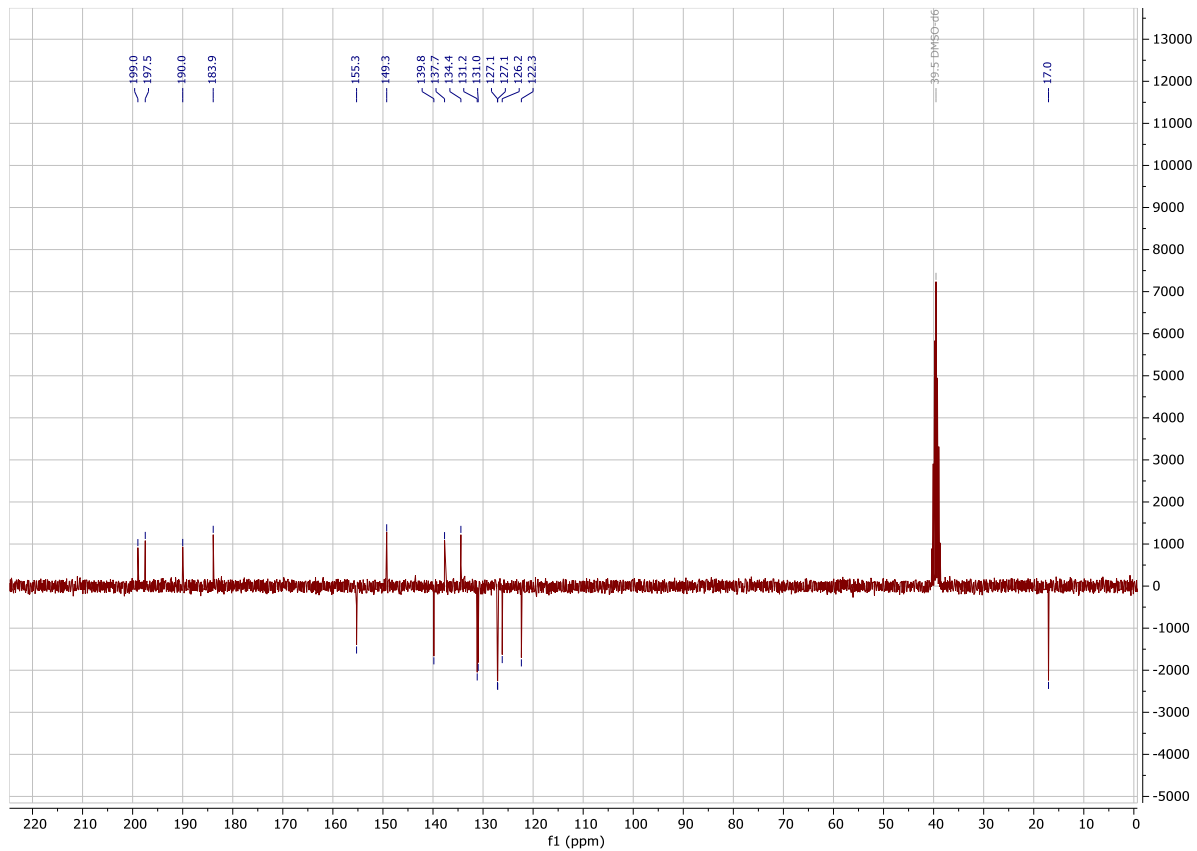

**Figure S3.** <sup>1</sup>H NMR (top) and <sup>13</sup>C Jmod NMR (bottom) spectra of complex **Re-T-Tol** in DMSO-*d*<sub>6</sub>.

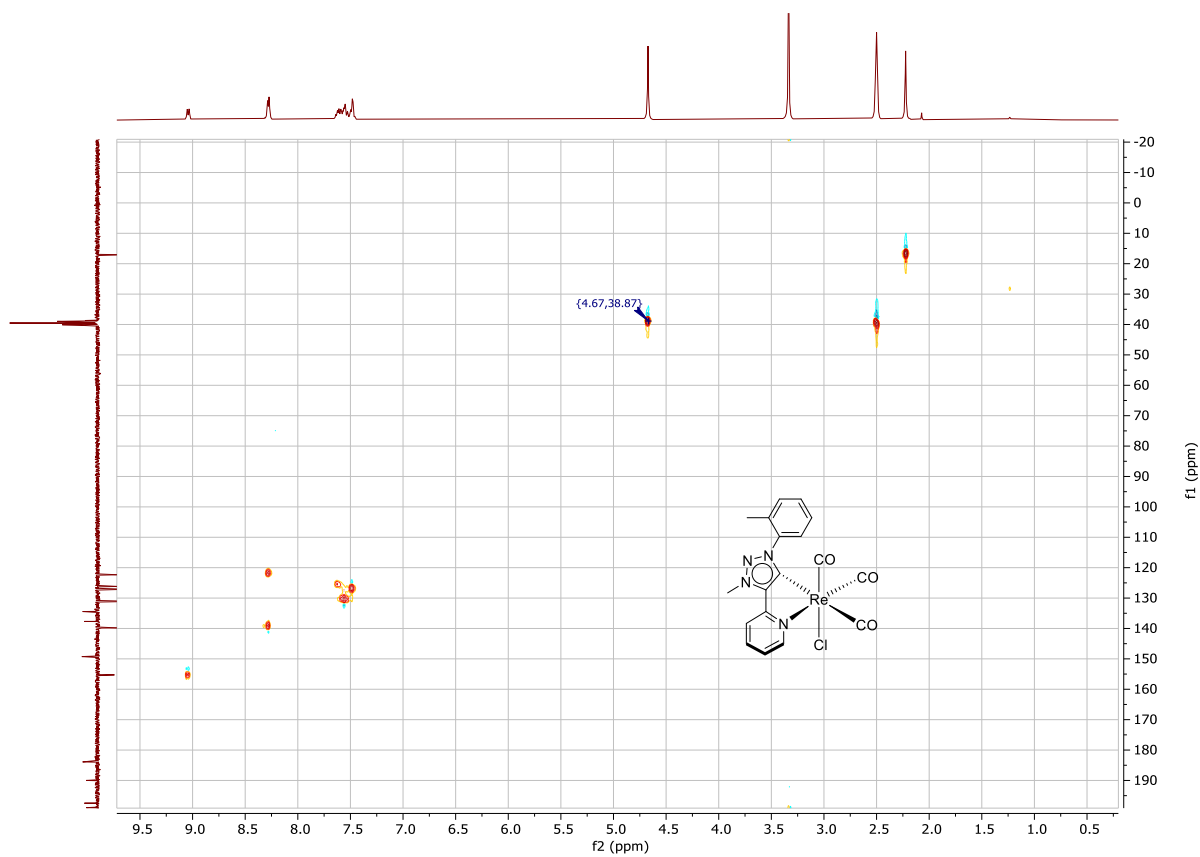

Figure S4. HSQC spectrum of complex **Re-T-Tol** in  $\text{DMSO-}d_6$ .

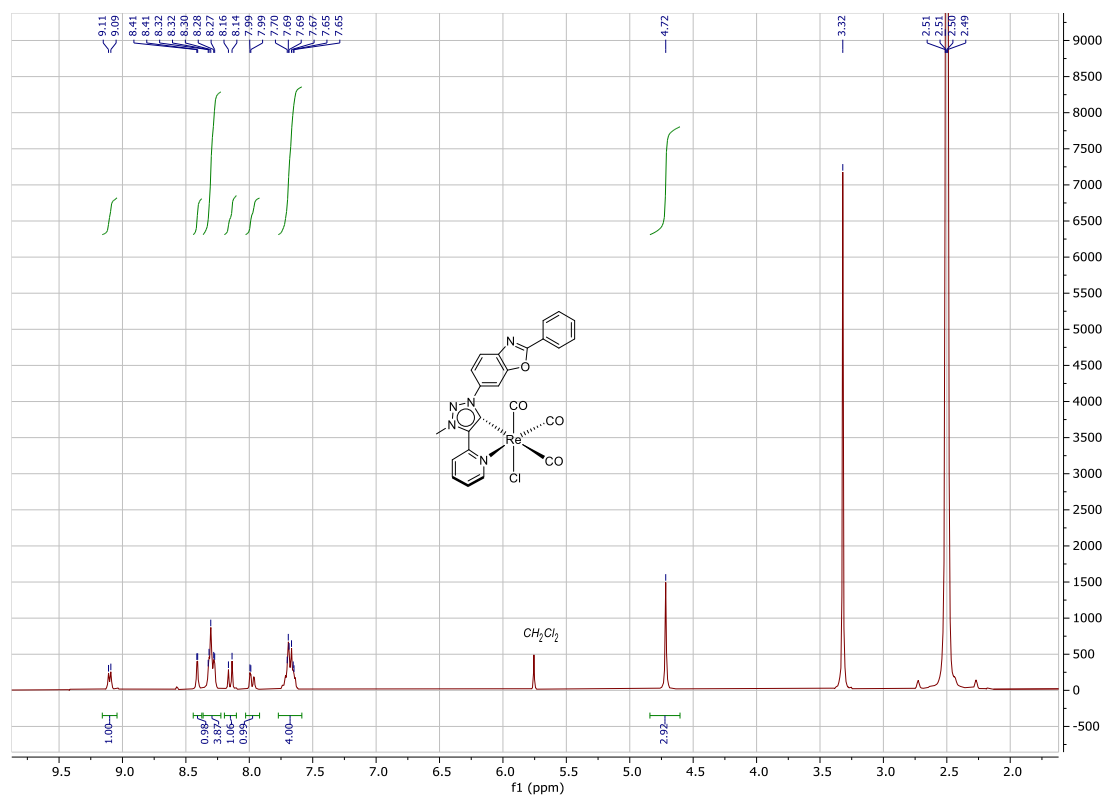

Figure S5.  $^1\text{H}$  NMR spectrum of complex **Re-T-BOP** in  $\text{DMSO-}d_6$ .

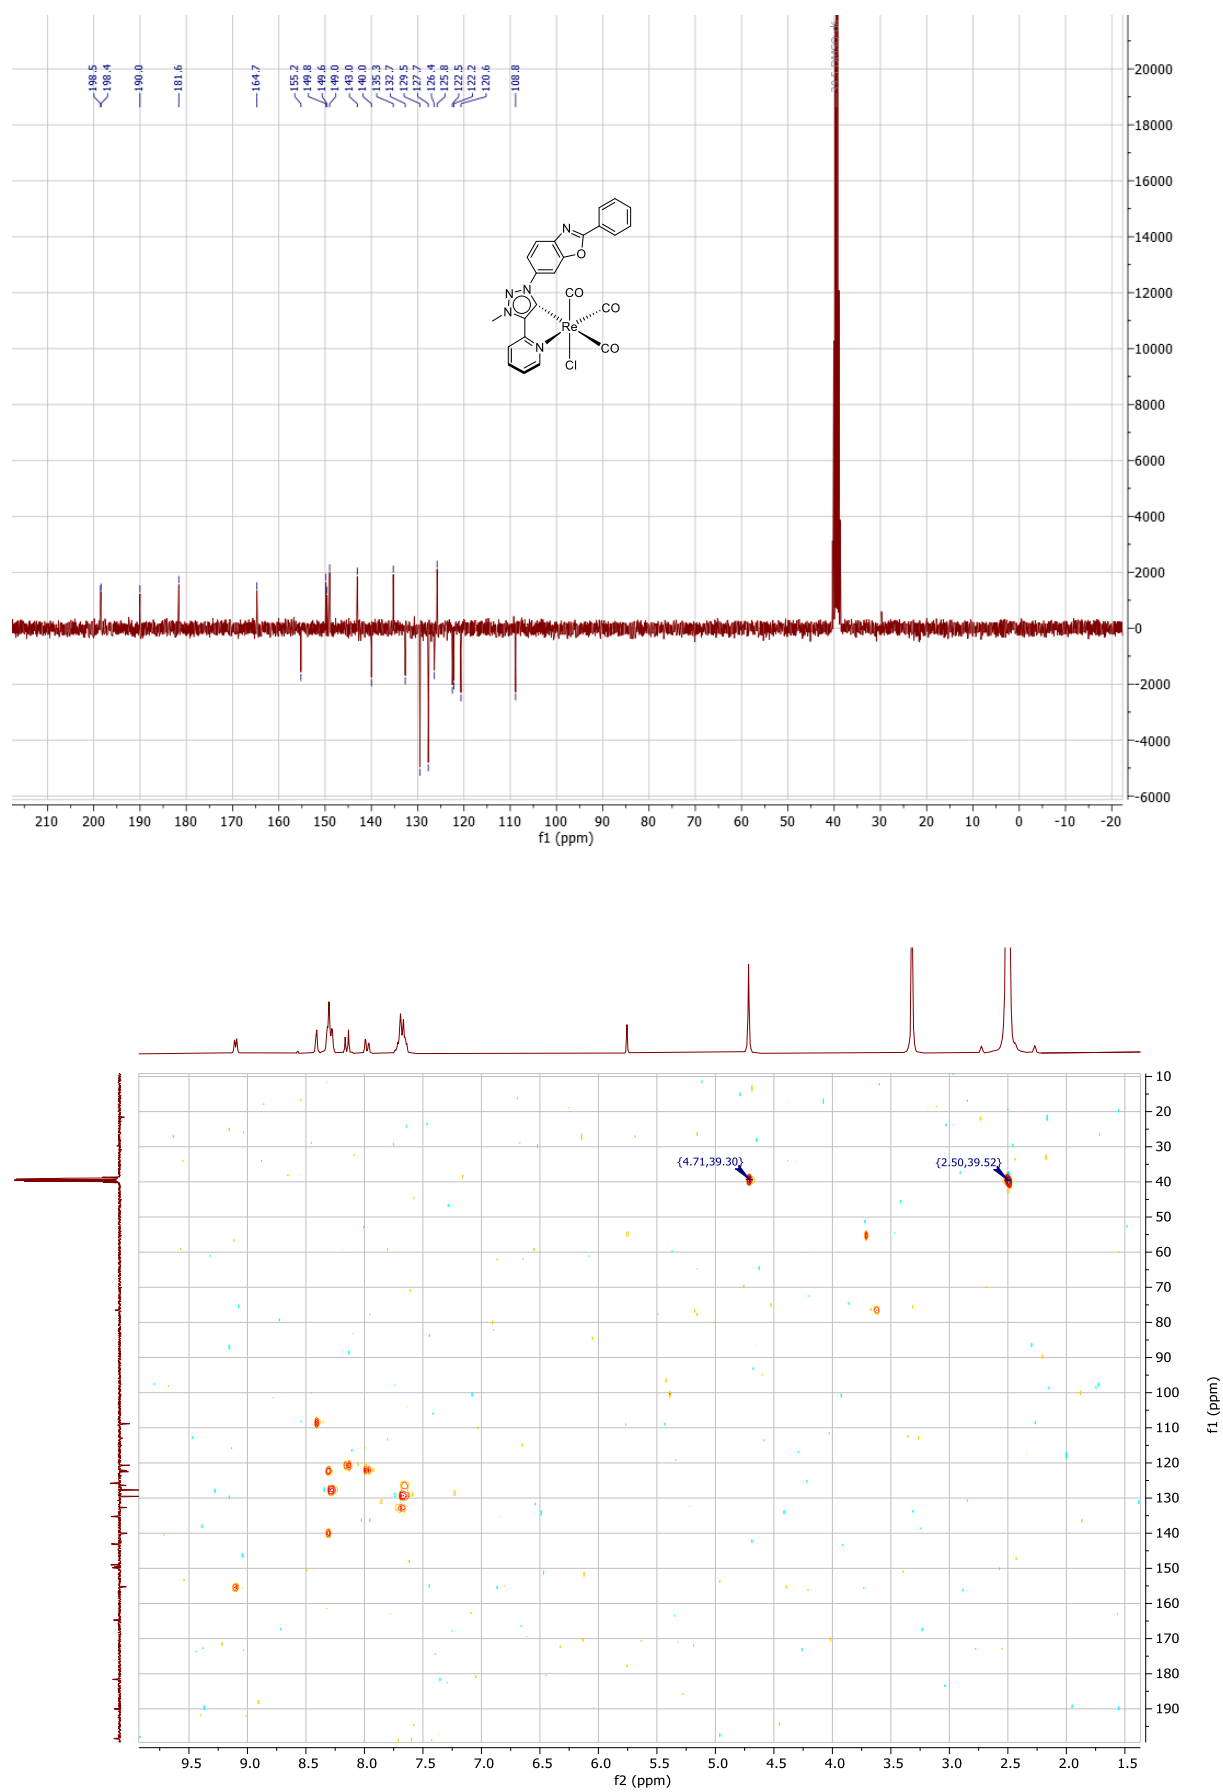

**Figure S6.**  $^{13}\text{C}$  Jmod NMR (top) and HSQC (bottom) spectra of complex **Re-T-BOP** in  $\text{DMSO-}d_6$ .

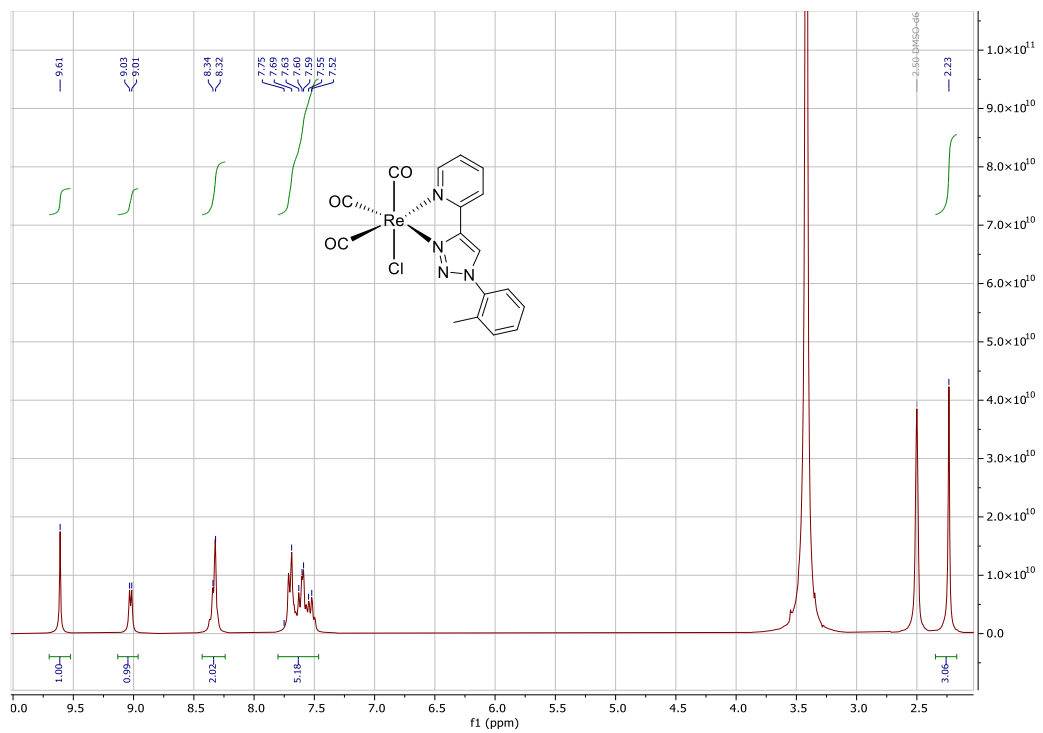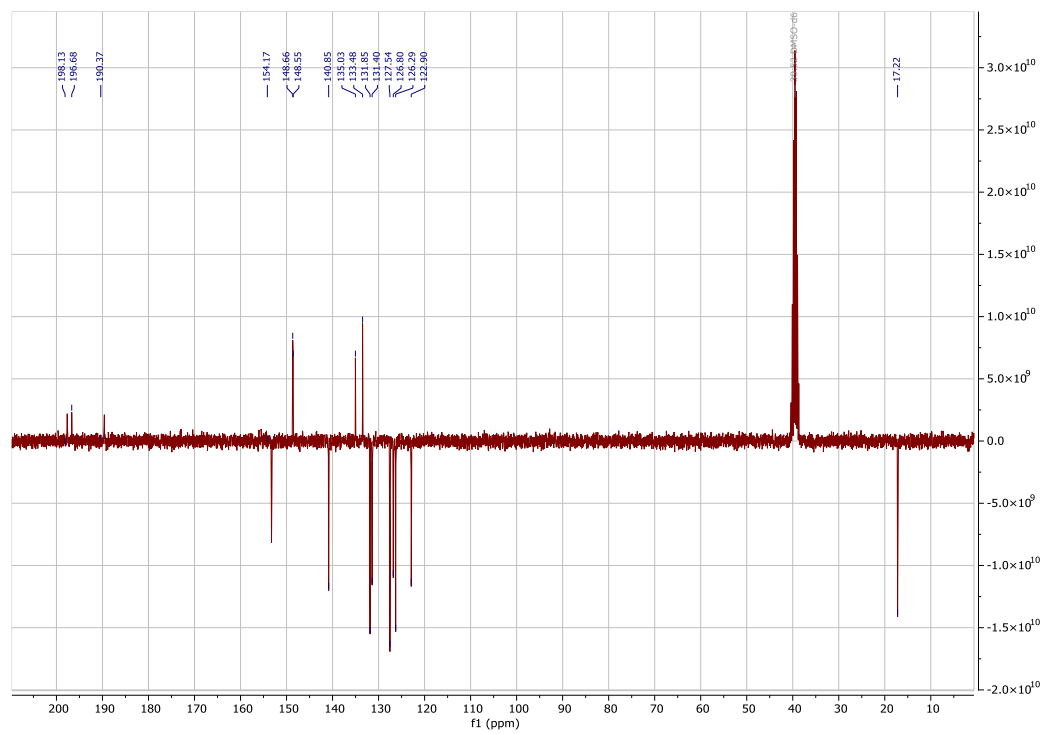

**Figure S7.** <sup>1</sup>H NMR (top) and <sup>13</sup>C Jmod NMR (bottom) spectra of complex **Re-Tol** in DMSO-*d*<sub>6</sub>.



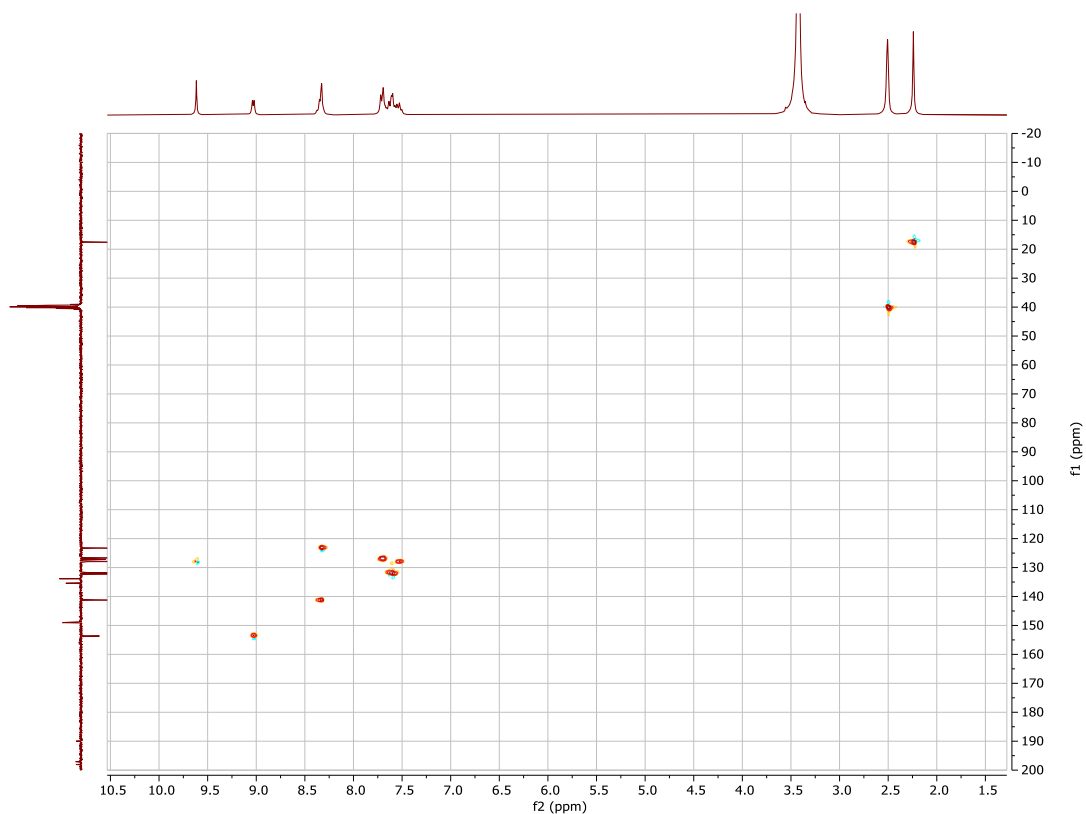

Figure S8. HSQC (bottom) spectrum of complex **Re-Tol** in  $\text{DMSO-}d_6$ .

#### Elemental Composition Report

##### Single Mass Analysis

Tolerance = 3.0 PPM / DBE: min = -5.0, max = 70.0

Element prediction: Off

Number of isotope peaks used for i-FIT = 3

Monoisotopic Mass, Odd and Even Electron Ions

879 formula(e) evaluated with 6 results within limits (up to 50 closest results for each mass)

Elements Used:

C: 0-100 H: 0-150 N: 0-5 O: 0-5 Cl: 0-1 185Re: 0-1

Cone voltage = 30V Xevo G2 QTOF #YCA210  
cvb6-107-2 89 (0.559) AM2 (Ar,20000.0,0.00,0.00); Cm (89:94-53:62x2.000)

11-Apr-2023 10:32:18

1: TOF MS ES+

1.27e+006

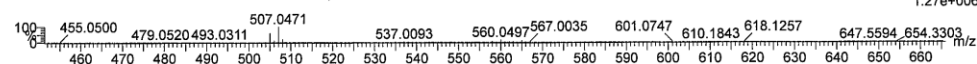

Minimum: -5.0  
Maximum: 70.0

| Mass | Calc. Mass | mDa | PPM | DBE | i-FIT | Norm | Conf(%) | Formula |
|------|------------|-----|-----|-----|-------|------|---------|---------|
|------|------------|-----|-----|-----|-------|------|---------|---------|

|          |          |      |      |      |       |       |       |                        |
|----------|----------|------|------|------|-------|-------|-------|------------------------|
| 558.0479 | 558.0480 | -0.1 | -0.2 | 16.0 | 158.4 | 1.984 | 13.75 | C22 H15 N O5 185Re     |
|          | 558.0485 | -0.6 | -1.1 | 11.5 | 158.0 | 1.561 | 21.00 | C19 H18 N2 O4 Cl 185Re |
|          | 558.0471 | 0.8  | 1.4  | 12.0 | 158.1 | 1.732 | 17.69 | C17 H16 N5 O3 Cl 185Re |
|          | 558.0470 | 0.9  | 1.6  | 44.0 | 158.9 | 2.453 | 8.60  | C46 H6                 |
|          | 558.0466 | 1.3  | 2.3  | 16.5 | 157.6 | 1.186 | 30.55 | C20 H13 N4 O4 185Re    |
|          | 558.0493 | -1.4 | -2.5 | 21.0 | 158.9 | 2.478 | 8.39  | C23 H11 N5 O 185Re     |

[M + NH<sub>4</sub>]<sup>+</sup>

Cone voltage = 30V Xevo G2 QTOF #YCA210  
cvb6-107-2 89 (0.559) AM2 (Ar,20000.0,0.00,0.00); Cm (89:94-53:62x2.000)

11-Apr-2023 10:32:18

1: TOF MS ES+

1.27e+006

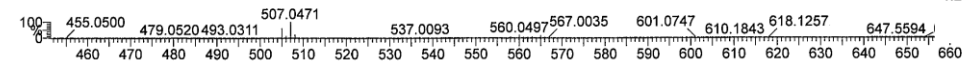

Minimum: -5.0  
Maximum: 70.0

| Mass | Calc. Mass | mDa | PPM | DBE | i-FIT | Norm | Conf(%) | Formula |
|------|------------|-----|-----|-----|-------|------|---------|---------|
|------|------------|-----|-----|-----|-------|------|---------|---------|

|          |          |      |      |      |       |       |       |                     |
|----------|----------|------|------|------|-------|-------|-------|---------------------|
| 505.0443 | 505.0447 | -0.4 | -0.8 | 29.0 | 291.6 | 1.383 | 25.09 | C29 H7 N5 O5        |
|          | 505.0439 | 0.4  | 0.8  | 14.0 | 290.8 | 0.543 | 58.11 | C17 H12 N4 O3 185Re |
|          | 505.0452 | -0.9 | -1.8 | 13.5 | 292.0 | 1.783 | 16.81 | C19 H14 N O4 185Re  |

[M - Cl]<sup>+</sup>

Figure S9. HRMS data for **Re-T-Phe**

**Elemental Composition Report**

**Single Mass Analysis**

Tolerance = 3.0 PPM / DBE: min = -5.0, max = 100.0  
 Element prediction: Off  
 Number of isotope peaks used for i-FIT = 3

Monoisotopic Mass, Odd and Even Electron Ions  
 1772 formula(e) evaluated with 11 results within limits (up to 50 closest results for each mass)  
 Elements Used:  
 C: 0-100 H: 0-120 N: 0-5 O: 0-5 Na: 0-1 Cl: 0-1 185Re: 0-1

Cone voltage = 30 V XEVO G2 QTOF 08-Jun-2021 14:18:01  
 CVB5-155 81 (0.503) AM2 (Ar,20000.0,0.00,0.00); Cm (80:85-59:63x2.000) 1: TOF MS ES+  
 3.93e+004

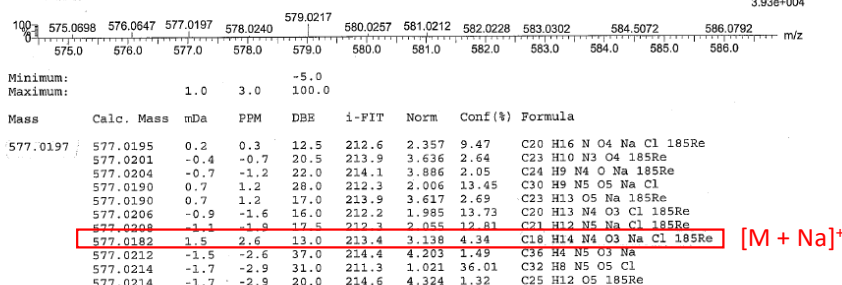

Cone voltage = 30 V XEVO G2 QTOF 08-Jun-2021 14:18:01  
 CVB5-155 81 (0.503) AM2 (Ar,20000.0,0.00,0.00); Cm (80:85-59:63x2.000) 1: TOF MS ES+  
 3.99e+005

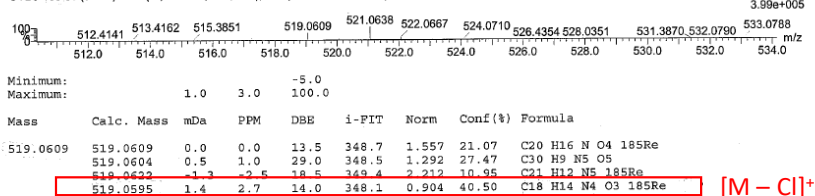

**Figure S10. HRMS data for Re-T-Tol.**

**Elemental Composition Report**

**Single Mass Analysis**

Tolerance = 3.0 PPM / DBE: min = -1.5, max = 50.0  
 Element prediction: Off  
 Number of isotope peaks used for i-FIT = 3

Monoisotopic Mass, Odd and Even Electron Ions  
 2910 formula(e) evaluated with 16 results within limits (up to 50 closest results for each mass)  
 Elements Used:  
 C: 0-80 H: 0-100 N: 0-8 O: 0-5 Na: 0-1 Cl: 0-1 185Re: 0-1

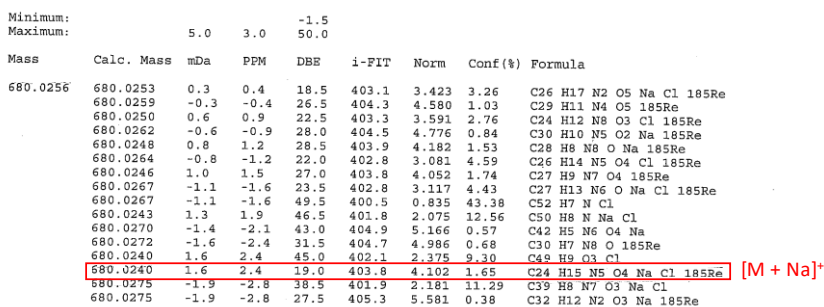

Cone voltage = 30 V XEVO G2 QTOF 30-Nov-2021 11:37:54  
 CVB5-196-2 98 (0.808) AM2 (Ar,20000.0,0.00,0.00); Cm (92:103-65:73x2.000) 1: TOF MS ES+  
 3.83e+006

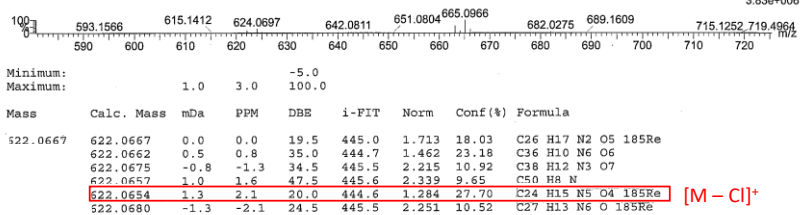

**Figure S11. HRMS data for Re-T-BOP.**

## Elemental Composition Report

### Single Mass Analysis

Tolerance = 3.0 PPM / DBE: min = -5.0, max = 70.0

Element prediction: Off

Number of isotope peaks used for i-FIT = 3

Monoisotopic Mass, Odd and Even Electron Ions

1550 formula(e) evaluated with 10 results within limits (up to 50 closest results for each mass)

Elements Used:

C: 0-100 H: 0-100 N: 0-10 O: 0-5 Cl: 0-1 187Re: 0-1

Cone voltage =15V Xevo G2 QTOF #YCA210  
CVB6-90 83 (0.529) AM2 (Ar,20000.0,0.00,0.00); Cm (74:90-48:62x2.000)

02-Feb-2023 10:57:48  
2: TOF MS ES+

4.04e+005

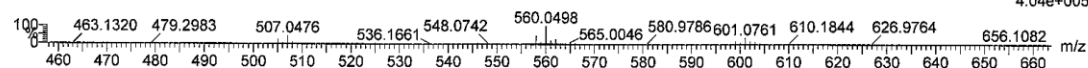

Minimum: -5.0  
Maximum: 1.0 3.0 70.0

| Mass     | Calc. Mass | mDa  | PPM  | DBE  | i-FIT | Norm   | Conf (%) | Formula                |
|----------|------------|------|------|------|-------|--------|----------|------------------------|
| 560.0498 | 560.0497   | 0.1  | 0.2  | 27.0 | 309.4 | 2.927  | 5.35     | C26 H9 N10 O4 Cl       |
|          | 560.0499   | -0.1 | -0.2 | 12.0 | 306.7 | 0.252  | 77.71    | C17 H16 N5 O3 Cl 187Re |
|          | 560.0500   | -0.2 | -0.4 | 43.5 | 321.6 | 15.163 | 0.00     | C45 H6 N               |
|          | 560.0494   | 0.4  | 0.7  | 16.5 | 319.8 | 13.369 | 0.00     | C20 H13 N4 O4 187Re    |
|          | 560.0492   | 0.6  | 1.1  | 31.5 | 320.2 | 13.735 | 0.00     | C29 H6 N9 O5           |
|          | 560.0508   | -1.0 | -1.8 | 21.5 | 320.1 | 13.680 | 0.00     | C21 H9 N8 187Re        |
|          | 560.0508   | -1.0 | -1.8 | 16.0 | 320.2 | 13.759 | 0.00     | C22 H15 N O5 187Re     |
|          | 560.0510   | -1.2 | -2.1 | 26.5 | 311.0 | 4.509  | 1.10     | C28 H11 N7 O5 Cl       |
|          | 560.0486   | 1.2  | 2.1  | 12.5 | 309.2 | 2.735  | 6.49     | C15 H14 N8 O2 Cl 187Re |
|          | 560.0513   | -1.5 | -2.7 | 11.5 | 308.8 | 2.370  | 9.35     | C19 H18 N2 O4 Cl 187Re |

[M + NH<sub>4</sub>]<sup>+</sup>

## Elemental Composition Report

### Single Mass Analysis

Tolerance = 3.0 PPM / DBE: min = -5.0, max = 70.0

Element prediction: Off

Number of isotope peaks used for i-FIT = 3

Monoisotopic Mass, Odd and Even Electron Ions

1214 formula(e) evaluated with 7 results within limits (up to 50 closest results for each mass)

Elements Used:

C: 0-100 H: 0-100 N: 0-10 O: 0-10 187Re: 0-1

Cone voltage =15V Xevo G2 QTOF #YCA210  
CVB6-90 83 (0.529) AM2 (Ar,20000.0,0.00,0.00); Cm (74:90-48:62x2.000)

02-Feb-2023 10:57:48  
2: TOF MS ES+

4.04e+005

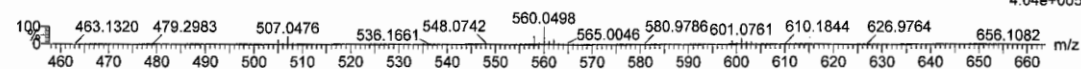

Minimum: -5.0  
Maximum: 1.0 3.0 70.0

| Mass     | Calc. Mass | mDa  | PPM  | DBE  | i-FIT | Norm  | Conf (%) | Formula             |
|----------|------------|------|------|------|-------|-------|----------|---------------------|
| 507.0476 | 507.0478   | -0.2 | -0.4 | 28.5 | 276.9 | 6.257 | 0.19     | C28 H7 N6 O5        |
|          | 507.0480   | -0.4 | -0.8 | 13.5 | 273.6 | 2.965 | 5.16     | C19 H14 N O4 187Re  |
|          | 507.0472   | 0.4  | 0.8  | 1.5  | 278.5 | 7.865 | 0.04     | C3 H14 N9 O9 187Re  |
|          | 507.0467   | 0.9  | 1.8  | 14.0 | 270.7 | 0.077 | 92.62    | C17 H12 N4 O3 187Re |
|          | 507.0485   | -0.9 | -1.8 | 1.0  | 274.7 | 4.076 | 1.70     | C5 H16 N6 O10 187Re |
|          | 507.0465   | 1.1  | 2.2  | 23.5 | 277.3 | 6.643 | 0.13     | C27 H11 N2 O9       |
|          | 507.0464   | 1.2  | 2.4  | 29.0 | 277.0 | 6.418 | 0.16     | C26 H5 N9 O4        |

[M - Cl]<sup>+</sup>

Figure S12. HRMS data for Re-Tol.

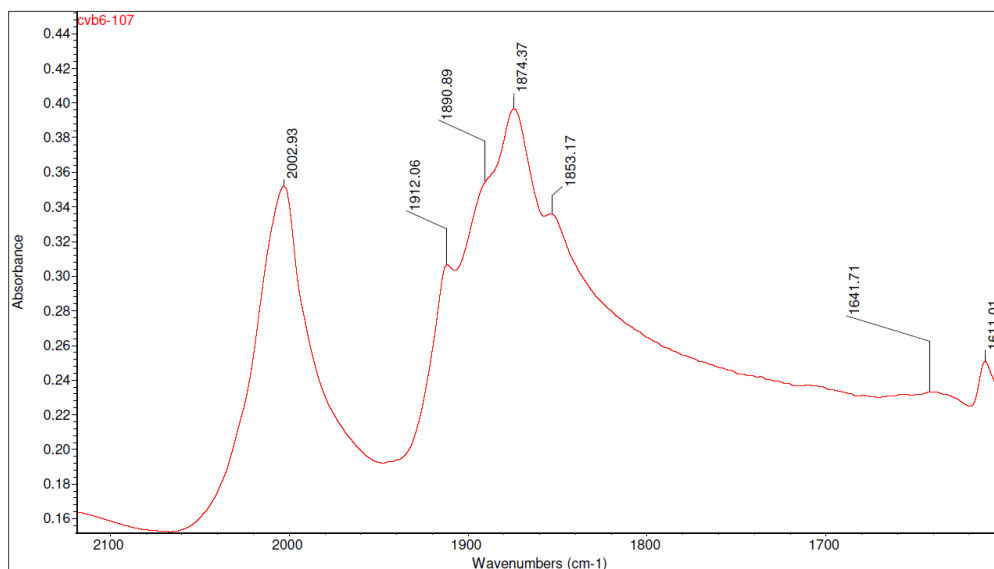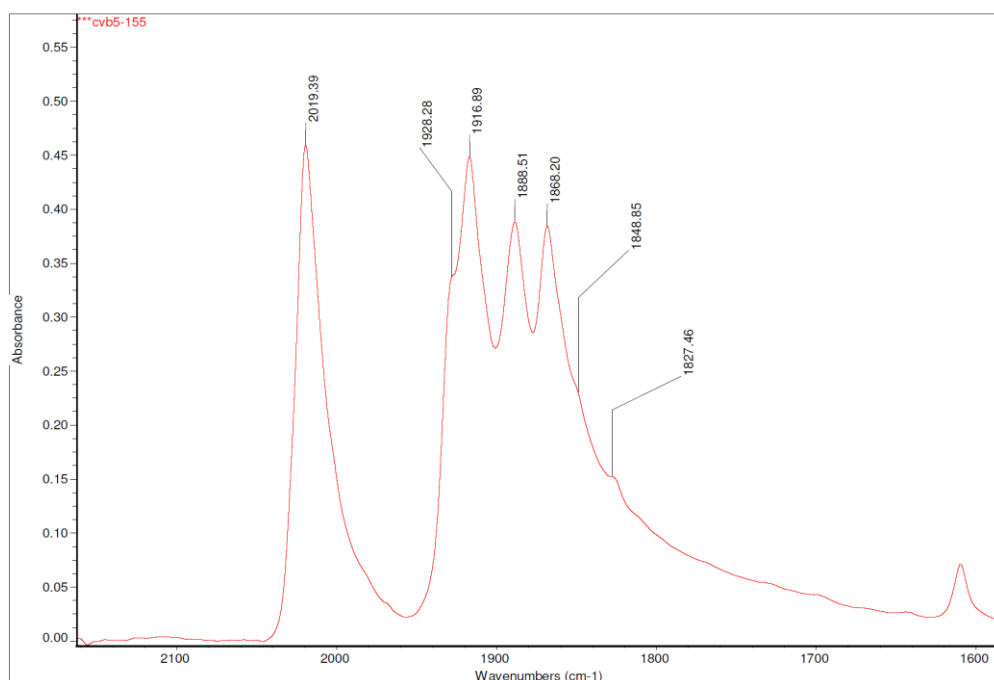

**Figure S13.** ATR FTIR spectra of the microcrystalline powder of **Re-T-Phe** (top) and **Re-T-Tol** (bottom).

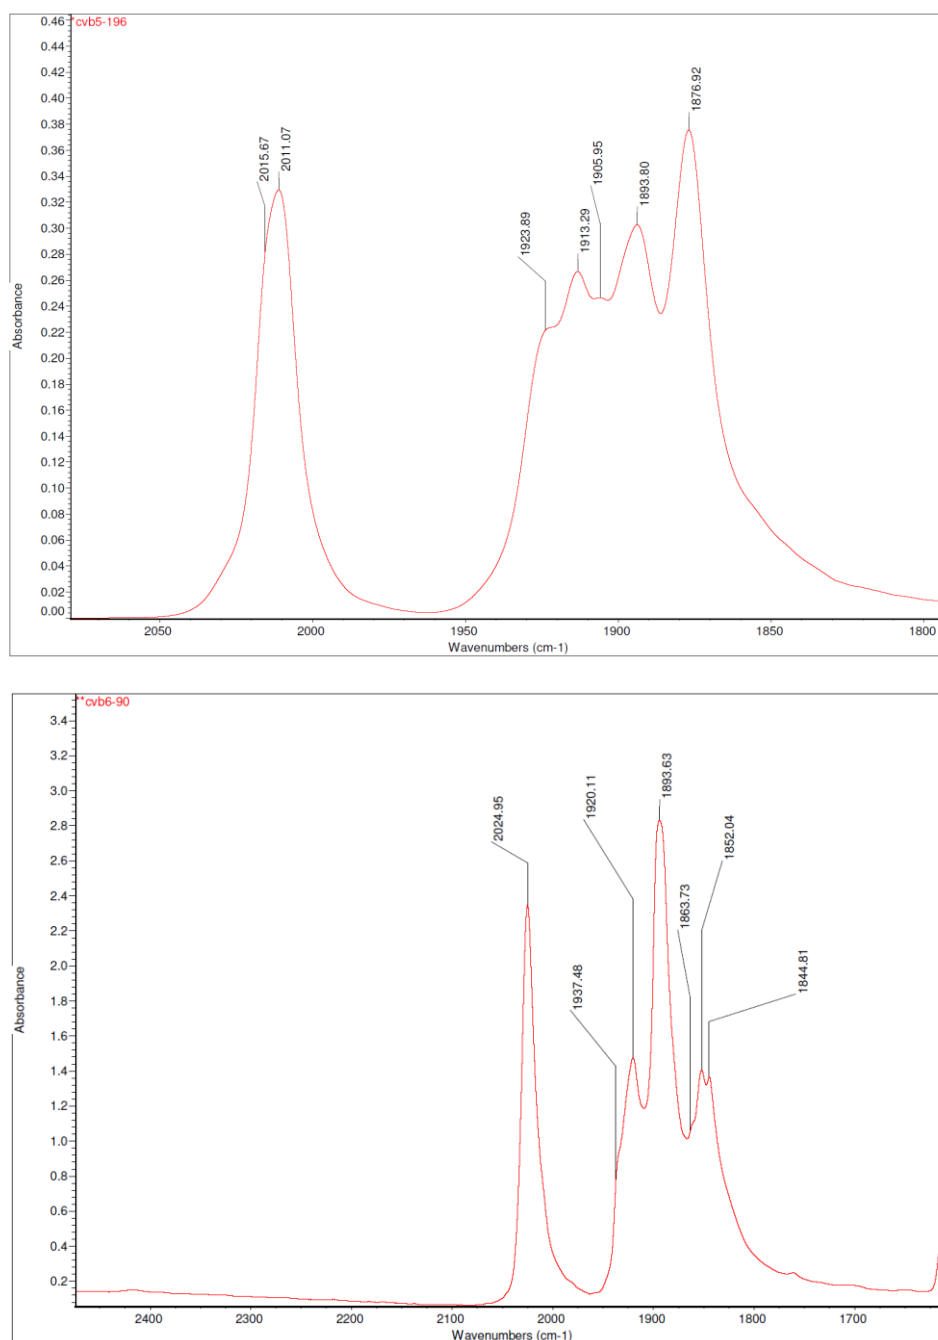

**Figure S14.** ATR FTIR spectrum of microcrystalline powders of **Re-T-BOP** (top) and **Re-Tol** (bottom)

**Table S1.** FTIR data for all complexes as microcrystalline powders (ATR) and in CH<sub>2</sub>Cl<sub>2</sub> solution.

| Complex         | $\nu_{\text{C=O}}$ (ATR) (cm <sup>-1</sup> ) | $\nu_{\text{C=O}}$ (CH <sub>2</sub> Cl <sub>2</sub> ) (cm <sup>-1</sup> ) | $\langle \nu_{\text{C=O}}(\text{CH}_2\text{Cl}_2) \rangle$ (cm <sup>-1</sup> ) |
|-----------------|----------------------------------------------|---------------------------------------------------------------------------|--------------------------------------------------------------------------------|
| <b>Re-T-Phe</b> | 2003, 1912, 1891, 1874, 1853                 | 2016, 1915, 1885                                                          | 1939                                                                           |
| <b>Re-T-Tol</b> | 2019, 1917, 1888, 1868                       | 2016, 1916, 1884                                                          | 1939                                                                           |
| <b>Re-T-BOP</b> | 2011, 1913, 1894, 1877                       | 2016, 1916, 1887                                                          | 1940                                                                           |
| <b>Re-Phe</b>   | 2024, 1930, 1894, 1879, 1848 <sup>a</sup>    | 2028, 1927, 1900                                                          | 1952                                                                           |
| <b>Re-Tol</b>   | 2025, 1920, 1894, 1852, 1845                 | 2028, 1927, 1899                                                          | 1951                                                                           |
| <b>Re-BOP</b>   | 2030, 1920, 1903 <sup>b</sup>                | 2028, 1943 <sup>c</sup> , 1921, 1889                                      | 1946                                                                           |

<sup>a</sup> From Poirot *et al. Dalton Trans.* 2021, **50**, 13686–13698.

<sup>b</sup> From Wang *et al. Dalton Trans.* 2018, **47**, 8087–8099.

<sup>c</sup> not considered for calculation.

## Crystallographic data

|                                                  | <b>Re-T-Phe</b>                                                    | <b>Re-T-Tol</b>                                                    | <b>Re-Phe</b>                                                      | <b>Re-Tol</b>                                                      |
|--------------------------------------------------|--------------------------------------------------------------------|--------------------------------------------------------------------|--------------------------------------------------------------------|--------------------------------------------------------------------|
| Empirical formula                                | C <sub>17</sub> H <sub>12</sub> N <sub>4</sub> O <sub>3</sub> ClRe | C <sub>18</sub> H <sub>14</sub> ClN <sub>4</sub> O <sub>3</sub> Re | C <sub>16</sub> H <sub>10</sub> N <sub>4</sub> O <sub>3</sub> ClRe | C <sub>17</sub> H <sub>12</sub> N <sub>4</sub> O <sub>3</sub> ClRe |
| Formula weight                                   | 541.97                                                             | 555.98                                                             | 527.93                                                             | 541.97                                                             |
| Crystal system                                   | Monoclinic                                                         | Monoclinic                                                         | Orthorhombic                                                       | Monoclinic                                                         |
| Space group                                      | P <sub>n</sub>                                                     | P2 <sub>1/c</sub>                                                  | P b c a                                                            | P2 <sub>1/c</sub>                                                  |
| Unit cell dimensions                             |                                                                    |                                                                    |                                                                    |                                                                    |
| <i>a</i> (Å)                                     | 7.4855(4)                                                          | 13.0933(5)                                                         | 13.1442(10)                                                        | 17.1110(11)                                                        |
| <i>b</i> (Å)                                     | 8.5760(4)                                                          | 8.7846(4)                                                          | 6.8213(5)                                                          | 10.9130(8)                                                         |
| <i>c</i> (Å)                                     | 13.7433(7)                                                         | 15.9309(7)                                                         | 36.375(3)                                                          | 9.7176(7)                                                          |
| $\alpha$ (°)                                     | 90                                                                 | 90                                                                 | 90                                                                 | 90                                                                 |
| $\beta$ (°)                                      | 104.060 (1)                                                        | 92.1447(17)                                                        | 90                                                                 | 99.738(3)                                                          |
| $\gamma$ (°)                                     | 90                                                                 | 90                                                                 | 90                                                                 | 90                                                                 |
| Volume (Å <sup>3</sup> )                         | 855.83(7)                                                          | 1831.08(14)                                                        | 3261.4(4)                                                          | 1788.4(2)                                                          |
| Z                                                | 2                                                                  | 4                                                                  | 8                                                                  | 4                                                                  |
| Density (calculated)<br>(Mg/m <sup>3</sup> )     | 2.103                                                              | 2.017                                                              | 2.150                                                              | 2.013                                                              |
| Crystal size (mm <sup>3</sup> )                  | 0.160 × 0.120 × 0.060                                              | 0.160 × 0.140 × 0.120                                              | 0.200 × 0.040 × 0.040                                              | 0.200 × 0.080 × 0.060                                              |
| Reflections collected                            | 27075                                                              | 57189                                                              | 115433                                                             | 71992                                                              |
| Independent reflections                          | 5797 [R(int) = 0.0299]                                             | 4531 [R(int) = 0.0281]                                             | 6553 [R(int) = 0.0554]                                             | 5983 [R(int) = 0.0762]                                             |
| Restraints/parameters                            | 2 / 237                                                            | 0 / 246                                                            | 0 / 226                                                            | 0 / 236                                                            |
| Final R1 index                                   | 0.0166                                                             | 0.0145                                                             | 0.0213                                                             | 0.0250                                                             |
| I > 2σ(I)                                        |                                                                    |                                                                    |                                                                    |                                                                    |
| wR2 (all data)                                   | 0.0377                                                             | 0.0319                                                             | 0.0435                                                             | 0.0524                                                             |
| Largest diff. peak and hole (e Å <sup>-3</sup> ) | 1.422 and -1.178                                                   | 0.595 and -0.931                                                   | 0.844 and -1.325                                                   | 1.015 and -1.002                                                   |
| CCDC                                             | 2327668                                                            | 2327669                                                            | 2327670                                                            | 2327671                                                            |

**Table S2.** Selected crystallographic data of pyridyl-triazolylidene-based complexes **Re-T-Phe**, **Re-T-Tol** and **Re-T-BOP**, and pyridyl-triazole-based complexes **Re-Phe** and **Re-Tol**.

**Table S3.** Selected bond lengths (Å) for triazolylidene-based complexes **Re-T-Phe**, **Re-T-Tol** and **Re-T-BOP**, and for the pyta-based complexes **Re-Phe** and **Re-Tol**. The atoms were numbered like on the molecular views. For the sake of comparison, each line corresponds to the same bond in each complex. For molecular views, the displacement ellipsoids are drawn at the 50% probability level.

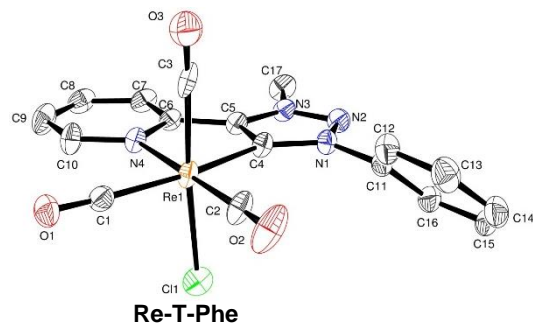

| Bond        | Re-T-Phe   | Bond        | Re-T-Tol   | Bond        | Re-Phe     | Re-Tol    |
|-------------|------------|-------------|------------|-------------|------------|-----------|
| Re(1)-C(1)  | 1.941(4)   | Re(1)-C(3)  | 1.958(2)   | Re(1)-C(1)  | 1.918(2)   | 1.921(3)  |
| Re(1)-C(2)  | 1.913(4)   | Re(1)-C(2)  | 1.911(2)   | Re(1)-C(2)  | 1.927(2)   | 1.916(3)  |
| Re(1)-C(3)  | 1.994(4)   | Re(1)-C(1)  | 1.897(2)   | Re(1)-C(3)  | 1.906(2)   | 1.932(3)  |
| Re(1)-C(4)  | 2.160 (3)  | Re(1)-C(4)  | 2.117(2)   | Re(1)-N(1)  | 2.1589(17) | 2.152(2)  |
| Re(1)-N(4)  | 2.234 (3)  | Re(1)-N(4)  | 2.2341(17) | Re(1)-N(4)  | 2.2055(19) | 2.195(2)  |
| Re(1)-Cl(1) | 2.4811(12) | Re(1)-Cl(1) | 2.5260(5)  | Re(1)-Cl(1) | 2.4953(5)  | 2.4738(8) |
| O(1)-C(1)   | 1.144(4)   | O(3)-C(3)   | 1.145(3)   | O(1)-C(1)   | 1.151(3)   | 1.149(4)  |
| O(2)-C(2)   | 1.149(5)   | O(2)-C(2)   | 1.151(3)   | O(2)-C(2)   | 1.144(3)   | 1.146(4)  |
| O(3)-C(3)   | 1.081(5)   | O(1)-C(1)   | 1.156(3)   | O(3)-C(3)   | 1.147(3)   | 1.110(4)  |

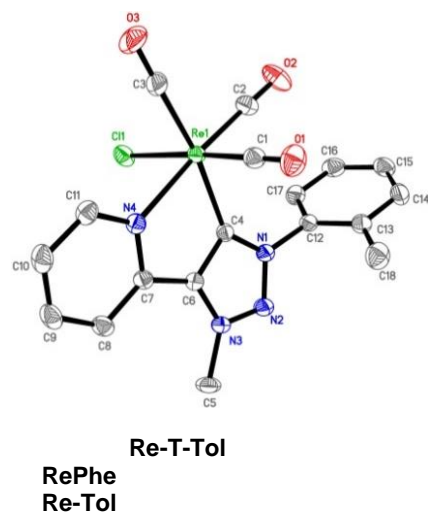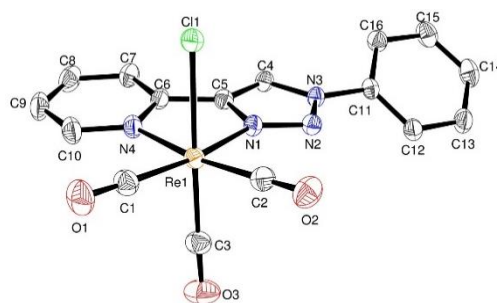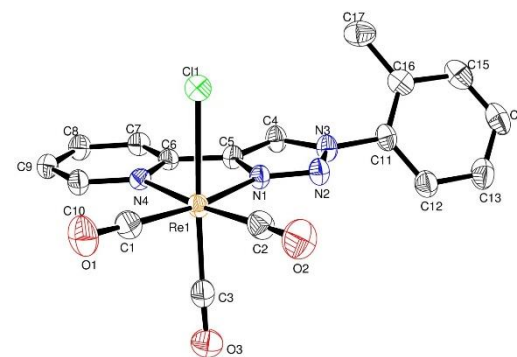

**Table S4.** Selected angles (°) for triazolylidene-based complexes **Re-T-Phe**, **Re-T-Tol** and **Re-T-BOP**, and for the pyta-based complexes **Re-Phe** and **Re-Tol**. For the sake of comparison, each line corresponds to the same bond in each complex. The atoms were numbered like on the molecular views.

| Angle            | Re-T-Phe   | Angle            | Re-T-Tol  | Angle            | Re-Phe    | Re-Tol     |
|------------------|------------|------------------|-----------|------------------|-----------|------------|
| C(1)-Re(1)-C(2)  | 87.85(16)  | C(2)-Re(1)-C(3)  | 89.54(10) | C(1)-Re(1)-C(2)  | 90.34(10) | 88.08(13)  |
| C(1)-Re(1)-C(3)  | 91.04(15)  | C(1)-Re(1)-C(3)  | 91.76(9)  | C(1)-Re(1)-C(3)  | 90.56(10) | 91.46(13)  |
| C(2)-Re(1)-C(3)  | 88.38(16)  | C(1)-Re(1)-C(2)  | 88.42(9)  | C(2)-Re(1)-C(3)  | 89.48(10) | 88.47(13)  |
| C(1)-Re(1)-C(4)  | 167.30(15) | C(3)-Re(1)-C(4)  | 171.19(8) | C(1)-Re(1)-N(1)  | 171.03(9) | 170.94(11) |
| C(2)-Re(1)-C(4)  | 104.78(15) | C(2)-Re(1)-C(4)  | 98.69(8)  | C(2)-Re(1)-N(1)  | 98.14(8)  | 99.97(11)  |
| C(3)-Re(1)-C(4)  | 90.61(14)  | C(1)-Re(1)-C(4)  | 91.62(8)  | C(3)-Re(1)-N(1)  | 92.40(8)  | 92.87(11)  |
| C(1)-Re(1)-N(4)  | 92.80(13)  | C(3)-Re(1)-N(4)  | 96.92(8)  | C(1)-Re(1)-N(4)  | 96.63(8)  | 97.47(11)  |
| C(2)-Re(1)-N(4)  | 179.11(13) | C(2)-Re(1)-N(4)  | 172.88(8) | C(2)-Re(1)-N(4)  | 171.87(8) | 173.79(11) |
| C(3)-Re(1)-N(4)  | 92.22(13)  | C(1)-Re(1)-N(4)  | 94.35(8)  | C(3)-Re(1)-N(4)  | 94.61(9)  | 94.13(10)  |
| C(4)-Re(1)-N(4)  | 74.56(12)  | C(4)-Re(1)-N(4)  | 74.71(7)  | N(1)-Re(1)-N(4)  | 74.70(7)  | 74.29(8)   |
| C(1)-Re(1)-Cl(1) | 94.16(12)  | C(3)-Re(1)-Cl(1) | 89.29(7)  | C(1)-Re(1)-Cl(1) | 92.75(7)  | 92.92(9)   |
| C(2)-Re(1)-Cl(1) | 91.84(13)  | C(2)-Re(1)-Cl(1) | 95.39(7)  | C(2)-Re(1)-Cl(1) | 91.91(7)  | 92.39(10)  |
| C(3)-Re(1)-Cl(1) | 174.80(10) | C(1)-Re(1)-Cl(1) | 176.06(6) | C(3)-Re(1)-Cl(1) | 176.40(7) | 175.55(9)  |
| C(4)-Re(1)-Cl(1) | 84.31(10)  | C(4)-Re(1)-Cl(1) | 86.81(5)  | N(1)-Re(1)-Cl(1) | 84.11(5)  | 82.68(7)   |
| N(4)-Re(1)-Cl(1) | 87.49(9)   | N(4)-Re(1)-Cl(1) | 81.75(4)  | N(4)-Re(1)-Cl(1) | 83.60(5)  | 84.59(6)   |
| O(1)-C(1)-Re(1)  | 174.2(4)   | O(3)-(C3)-Re(1)  | 178.5(3)  | O(1)-C(1)-Re(1)  | 177.8(2)  | 177.3(3)   |
| O(2)-C(2)-Re(1)  | 177.7(3)   | O(2)-C(2)-Re(1)  | 177.7(3)  | O(2)-C(2)-Re(1)  | 177.9(2)  | 175.4(3)   |
| O(3)-C(3)-Re(1)  | 177.3(3)   | O(1)-C(1)-Re(1)  | 177.9(3)  | O(3)-C(3)-Re(1)  | 178.4(2)  | 174.2(4)   |



**Table S5.** Octahedral distortion parameters<sup>a</sup> for complexes **Re-Phe**, **Re-Tol**, **Re-T-Phe** and **Re-T-Tol**.

| Complex         | Octahedral distortion parameters |              |              |
|-----------------|----------------------------------|--------------|--------------|
|                 | $\zeta$ (Å)                      | $\Sigma$ (°) | $\Theta$ (°) |
| <b>Re-Phe</b>   | 1.11                             | 55.5         | 151          |
| <b>Re-Tol</b>   | 1.05                             | 63.1         | 168          |
| <b>Re-T-Phe</b> | 1.03                             | 54.9         | 186          |
| <b>Re-T-Tol</b> | 1.11                             | 58.2         | 170          |

<sup>a</sup> Octahedral distortion parameters are composed of three parameters: one bond-length distortion parameter  $\zeta$  and two bond-angle distortion parameters  $\Sigma$  and  $\Theta$ .  $\zeta$  is the average of the sum of the deviation of 6 unique metal–ligand bond lengths around the central metal atom ( $d_i$ ) from the average value ( $d_{\text{mean}}$ ).  $\Sigma$  can be defined as the sum of the deviation of the 12 *cis* L–Re–L angles  $\phi_i$  from 90°.  $\Sigma$  is a general measure of the deviation of a metal ion from an ideal octahedral geometry.  $\Theta$  can be defined as the sum of the deviation of the 24 torsional angles between the ligand atoms on opposite triangular faces of the octahedron viewed along the pseudo-threefold axis ( $\theta_i$ ) from 60°.  $\Theta$  represents the distortion of the  $\text{MX}_6$  geometry from perfectly octahedral ( $\text{O}_h$ ) to trigonal prismatic ( $\text{D}_{3h}$ ). Distortion parameters  $\zeta$ ,  $\Sigma$  and  $\Theta$  were calculated using the OctaDist software [R. Ketkaew, Y. Tantirungrotechai, P. Harding, G. Chastanet, P. Guionneau, M. Marchivie, D. J. Harding, *Dalton Trans.*, **2021**, 50, 1086–1096]. All values lie in the expected range observed for distorted quasi-octahedral Re(I) complexes. In fact, a perfectly octahedral complex would give  $\zeta = \Sigma = \Theta = 0$ .

**Table S6.** Short contacts detected in structures of **Re-Phe**, **Re-Tol**, **Re-T-Phe** and **Re-T-Tol**.

| D—H...A                     | D—H (Å) | H...A (Å) | D...A (Å) | D—H...A (°) | Symmetry codes    |
|-----------------------------|---------|-----------|-----------|-------------|-------------------|
| <b>Re-Phe</b>               |         |           |           |             |                   |
| C4—H4...C11 <sup>#1</sup>   | 0.95    | 2.47      | 3.377(2)  | 159         | 3/2-x, 1/2+y, z   |
| C9—H9...C11 <sup>#2</sup>   | 0.95    | 2.65      | 3.577(3)  | 164         | 1-x, 1-y, 1-z     |
| <b>Re-Tol</b>               |         |           |           |             |                   |
| C4—H4...C11 <sup>#3</sup>   | 0.95    | 2.61      | 3.487(3)  | 154         | x, 3/2-y, -1/2+z  |
| C7—H7...C11 <sup>#3</sup>   | 0.95    | 2.79      | 3.713(3)  | 163         | x, 3/2-y, -1/2+z  |
| C10—H10...O3 <sup>#4</sup>  | 0.95    | 2.57      | 3.460(4)  | 157         | 2-x, 2-y, 2-z     |
| C12—H12...O2 <sup>#5</sup>  | 0.95    | 2.47      | 3.389(4)  | 164         | x, 5/2-y, -1/2+z  |
| <b>Re-T-Phe</b>             |         |           |           |             |                   |
| C13—H13...O1 <sup>#6</sup>  | 0.95    | 2.52      | 3.330(6)  | 143         | 1/2+x, -y, -1/2+z |
| <b>Re-T-Tol</b>             |         |           |           |             |                   |
| C10—H10...C11 <sup>#7</sup> | 0.95    | 2.74      | 3.570(2)  | 146         | x, 1/2-y, 1/2+z   |

**Table S7.** Geometrical parameters for C—H... $\pi$  interactions detected in **Re-Phe**, **Re-T-Phe** and **Re-T-Tol**.

| X—H(i)...Cg(i)               | H...Cg (Å) | X...Cg (Å) | X—H...Cg (°) | H-Perp | Gamma |
|------------------------------|------------|------------|--------------|--------|-------|
| <b>Re-Phe</b>                |            |            |              |        |       |
| C4—H4...Cg2 <sup>#1</sup>    | 2.81       | 3.203(2)   | 106          | -2.75  | 11.26 |
| C12—H12...Cg4 <sup>#1</sup>  | 2.97       | 3.478(2)   | 115          | -2.97  | 1.32  |
| <b>Re-T-Phe</b>              |            |            |              |        |       |
| C17—H17B...Cg4 <sup>#2</sup> | 2.65       | 3.447(5)   | 138          | -2.62  | 8.34  |
| <b>Re-T-Tol</b>              |            |            |              |        |       |
| C5—H5B...Cg3 <sup>#3</sup>   | 2.74       | 3.593(3)   | 146          | -2.73  | 4.54  |

Cg(i) = center of gravity of ring i; X...Cg = distance of X to Cg; X—H...Cg = X—H—Cg angle; H-Perp = perpendicular distance of H to ring plane J;  $\gamma$  = angle between Cg—H vector and ring J normal. For **Re-Phe**, Cg2 and Cg4 are the centroids of the rings (N1/N2/N3/C4/C5) and (C11–C16), respectively. For **Re-T-Phe**, Cg4 is the centroid of the ring (C11–C16). For **Re-T-Tol**, Cg3 is the centroid of the ring (N4/C7–C11). Symmetry codes: #1: 3/2-x, 1/2+y, z; #2: 1/2+x, 1-y, 1/2+z; #3: 2-x, 1-y, 1-z.

**Table S8.** Geometrical parameters for  $\pi\cdots\pi$  interactions detected in **Re-Tol**, **Re-T-Phe** and **Re-T-Tol**.

| Cg(i)⋯Cg(j)           | Cg⋯Cg (Å)  | $\alpha$ (°) | $\beta$ (°) | $\gamma$ (°) | Cgi_Perp   | Cgj_Perp   | Slippage |
|-----------------------|------------|--------------|-------------|--------------|------------|------------|----------|
| <b>Re-Tol</b>         |            |              |             |              |            |            |          |
| Cg2⋯Cg3 <sup>#1</sup> | 3.7792(17) | 5.48(15)     | 22.1        | 17.1         | 3.6118(11) | 3.5011(11) | 1.423    |
| <b>Re-T-Phe</b>       |            |              |             |              |            |            |          |
| Cg3⋯Cg4 <sup>#3</sup> | 3.648(3)   | 4.8(2)       | 25.0        | 20.3         | 3.4216(18) | 3.3054(19) | 1.543    |
| <b>Re-T-Tol</b>       |            |              |             |              |            |            |          |
| Cg3⋯Cg4 <sup>#5</sup> | 3.6854(14) | 4.49(11)     | 19.4        | 23.8         | 3.3710(9)  | 3.4763(10) | 1.224    |

Cg(i) = plane number i;  $\alpha$  = dihedral angle between planes i and j;  $\beta$  = angle Cg(i)→Cg(j) or Cg(i)→Me vector and normal to plane i;  $\gamma$  = angle Cg(i)→Cg(j) vector and normal to plane j; Cg–Cg = distance between ring centroids; Cg(i)\_Perp = perpendicular distance of Cg(i) on ring j; Cg(j)\_Perp = perpendicular distance of Cg(j) on ring i; Slippage = distance between Cg(i) and perpendicular projection of Cg(j) on ring i. For **Re-Tol**, Cg2 and Cg3 are the centroids of the rings (N1/N2/N3/C4/C5) and (N4/C6–C10), respectively. For **Re-T-Phe**, Cg3 and Cg4 are the centroids of the rings (N4/C6–C10) and (C11–C16), respectively. For **Re-T-Tol**, Cg3 and Cg4 are the centroids of the rings (N4/C7–C11) and (C12–C17), respectively. Symmetry codes: #1:  $x, 3/2-y, -1/2+z$ ; #2:  $x, 3/2-y, 1/2+z$ ; #3:  $-1/2+x, 1-y, 1/2+z$ ; #4:  $1/2+x, 1-y, -1/2+z$ ; #5:  $x, 3/2-y, 1/2+z$ ; #6:  $x, 3/2-y, -1/2+z$ .

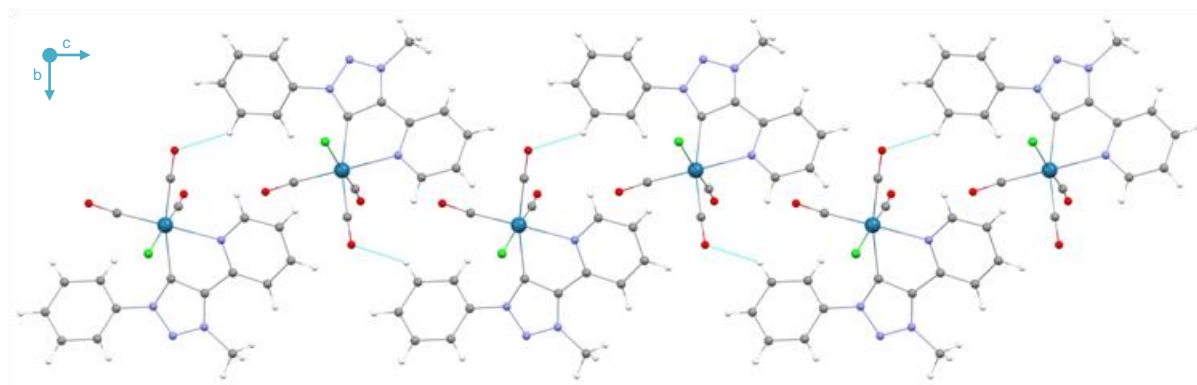**Figure S15.** One-dimensional chain of **Re-T-Phe** showing connection of molecules through the intermolecular C–H⋯O interactions along the *c* axis. Intermolecular C13–H13<sub>(Phe)</sub>⋯O1<sub>(CO)</sub> hydrogen bonding takes place between one CH group of the phenyl ring and the oxygen atom of the equatorial carbonyl group.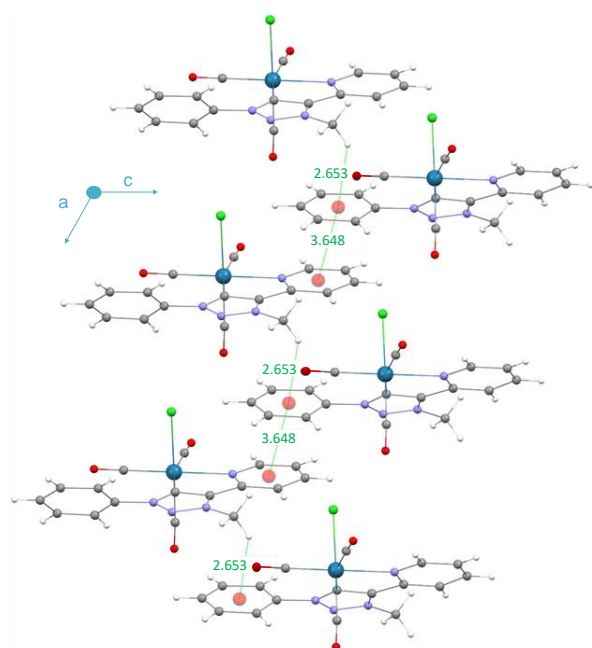**Figure S16.** C–H⋯ $\pi$  and  $\pi$ – $\pi$  interactions in complexes **Re-T-Phe**, with distances in Å.

Intermolecular C17–H17<sub>(trz)</sub>⋯ $\pi$ <sub>(Phe)</sub> interactions take place between the methyl group of the triazolylidene and the centroid Cg4 of the C11–C16 aromatic ring (C17–H17B⋯centroid Cg4 distances of 2.653 Å). Intermolecular  $\pi$ <sub>(py)</sub>– $\pi$ <sub>(Phe)</sub> stacking interactions take place between the coordinated N4C6–C10 pyridine ring and the C11–C16 phenyl ring (centroid Cg3⋯centroid Cg4 distances of 3.648 Å).

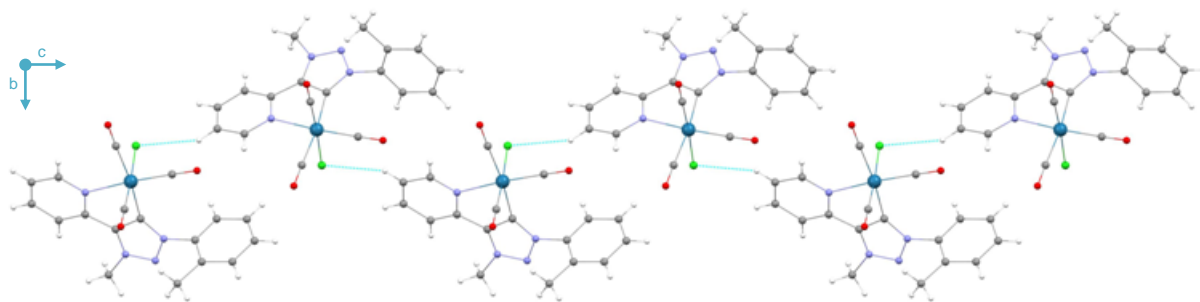

**Figure S17.** One-dimensional chain of **Re-T-Tol** showing connection of molecules through the intermolecular C–H...Cl interactions along the *c* axis. Adjacent molecules are linked through intermolecular C10–H10(py)...Cl1 hydrogen bonding between the CH group of the coordinated pyridine ring and the chloride ligand.

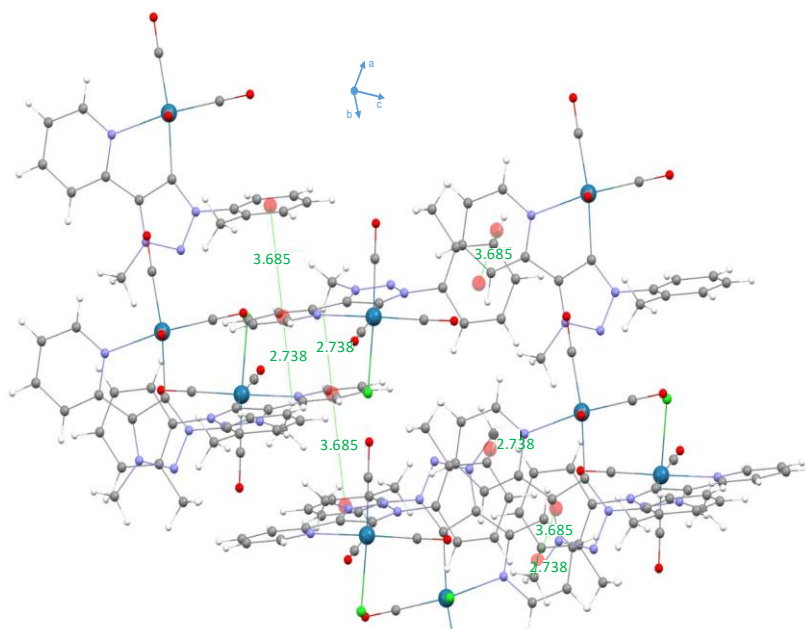

**Figure S18.** C–H... $\pi$  and  $\pi$ – $\pi$  interactions in complex **Re-T-Tol**, with distances in Å. Intermolecular C5–H5B<sub>(trz)</sub>... $\pi$ (py) interactions take place between the methyl group of the triazolylidene and the centroid Cg3 of the N4C7–C11 pyridine ring (C5–H5B...centroid Cg3 distances of 2.738 Å), and the intermolecular  $\pi$ (py)– $\pi$ (tol) stacking interactions occur between the coordinated pyridine ring N4C7–C11 and the tolyl ring C12–C17 (centroid Cg3...centroid Cg4 distances of 3.685 Å).

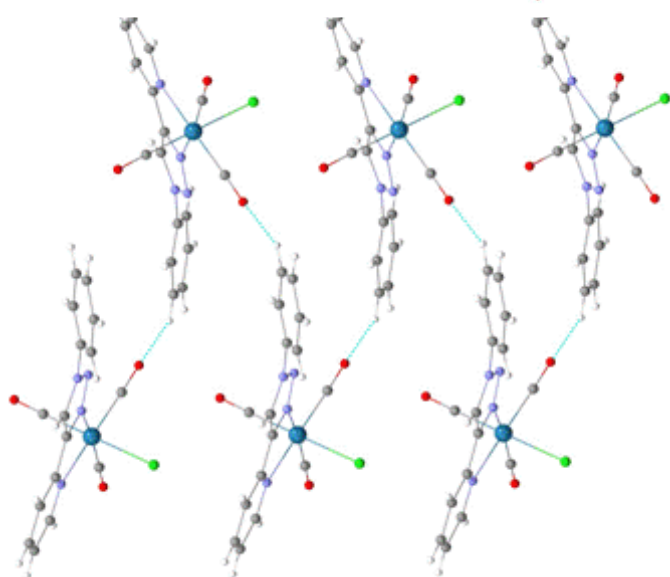

**Figure S19.** One-dimensional zig-zag chain of **Re-Phe** showing connection of molecules through the intermolecular C13–H13<sub>(phe)</sub>...O2(CO) interactions along the *b* axis.

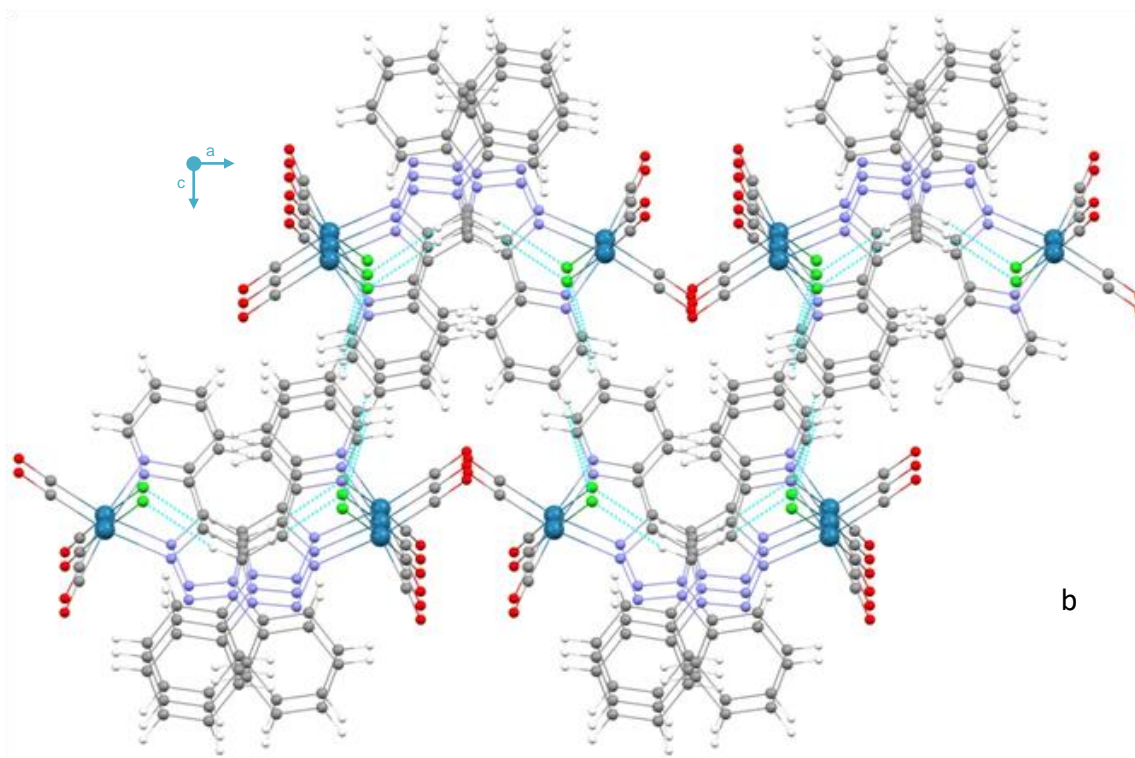

**Figure S20.** Two dimensional network of **Re-Phe** showing connection of molecules through the intermolecular C–H $\cdots$ Cl interactions in the *ac* plane. The bifurcated hydrogen bond takes place between the chloride ligand and the C–H group of the 1,2,3-triazole ring (C4–H4<sub>(trz)</sub> $\cdots$ Cl1) as well as with the C–H group of the pyridine ring (C9–H9<sub>(py)</sub> $\cdots$ Cl1) of neighboring molecules.

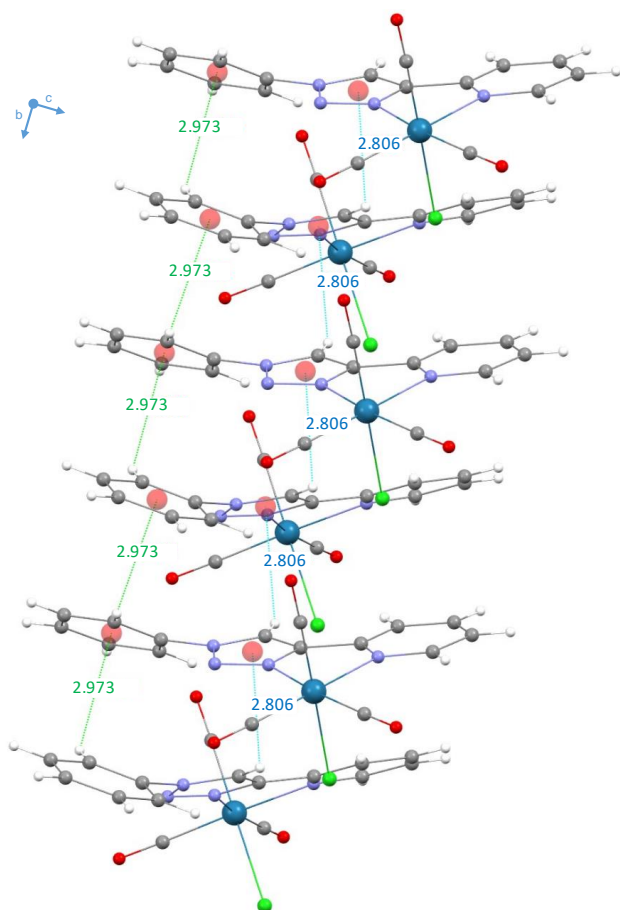

**Figure S21.** C–H $\cdots$  $\pi$  interactions in **Re-Phe**, with distances in Å. C4–H4<sub>(trz)</sub> $\cdots$  $\pi$ <sub>(trz)</sub> and C12–H12<sub>(Phe)</sub> $\cdots$  $\pi$ <sub>(Phe)</sub> interactions involve respectively the H4 and the Cg2 centroid (N1/N2/N3/C4/C5), with H4 $\cdots$ Cg2 distance of 2.806Å, as well as the H12 and the Cg4 centroid (C11–C16), with H12 $\cdots$ Cg4 distance of 2.973Å, respectively.

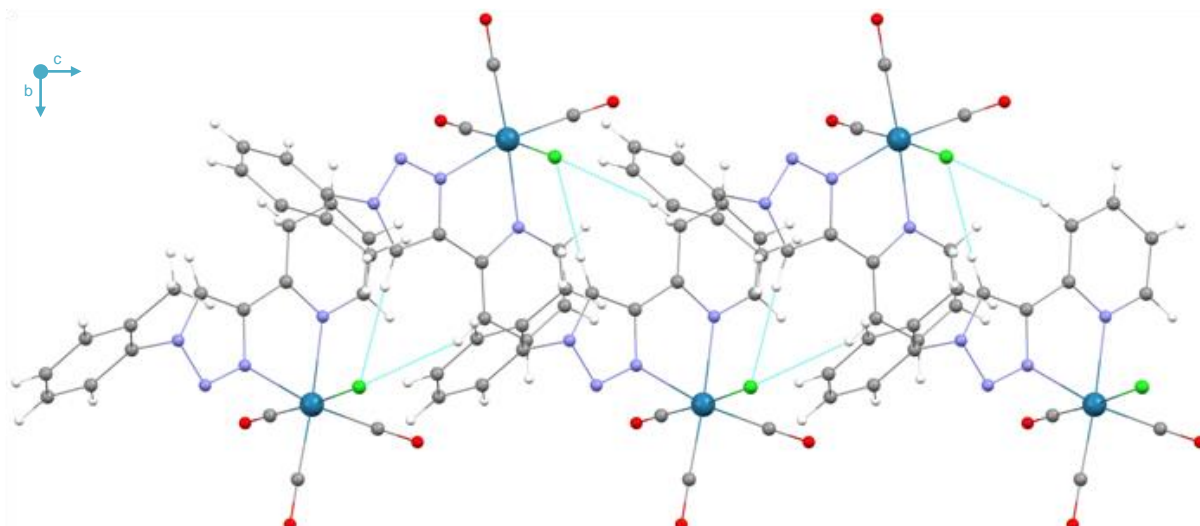

**Figure S22.** One-dimensional chain of **Re-Tol** showing the connection of molecules through the intermolecular C–H...Cl interactions along the *c* axis. The three-centred hydrogen bonding involves C4–H4<sub>(trz)</sub>...Cl1 and C7–H7<sub>(py)</sub>...Cl1.

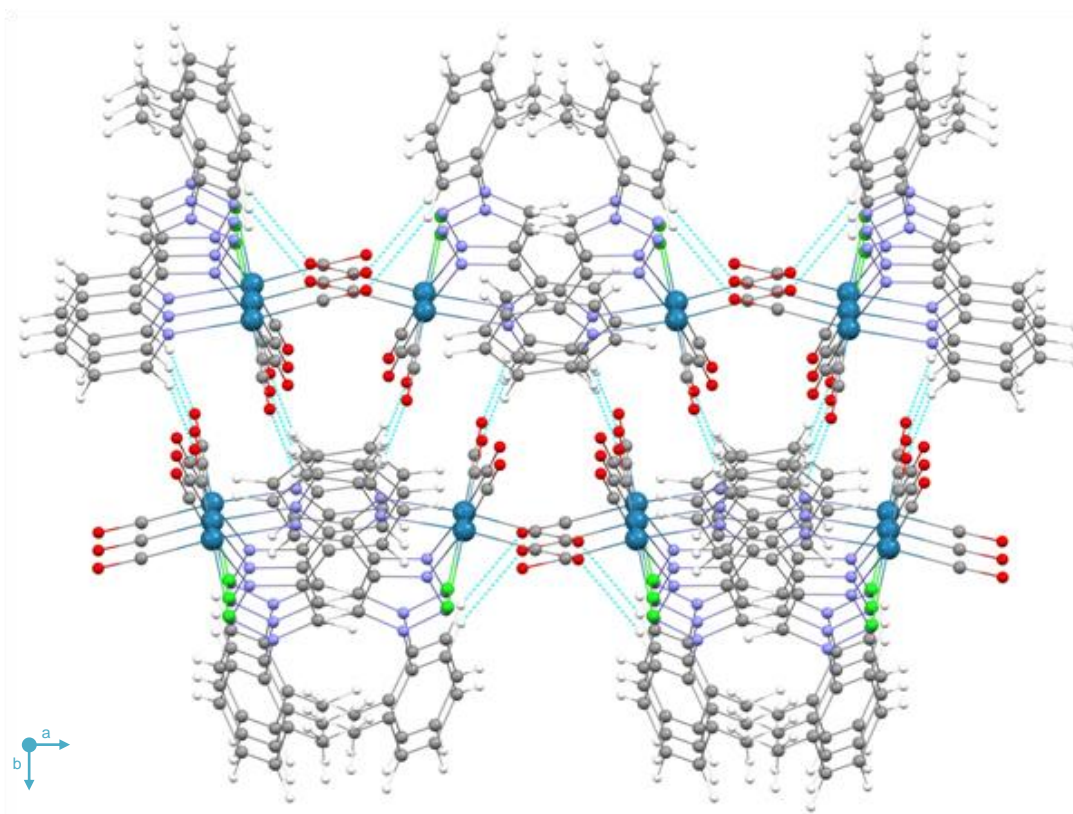

**Figure S23.** Two dimensional network of **Re-Tol** showing the connection of molecules through the intermolecular C–H...O interactions in the *ab* plane. The C12–H12(tol)...O2(CO) contacts involve the CH groups of the tolyl ring and the equatorial carbonyl groups, and the C10–H10(py)...O3(CO) contacts involve the CH groups of the pyridine ring and the apical carbonyl groups.

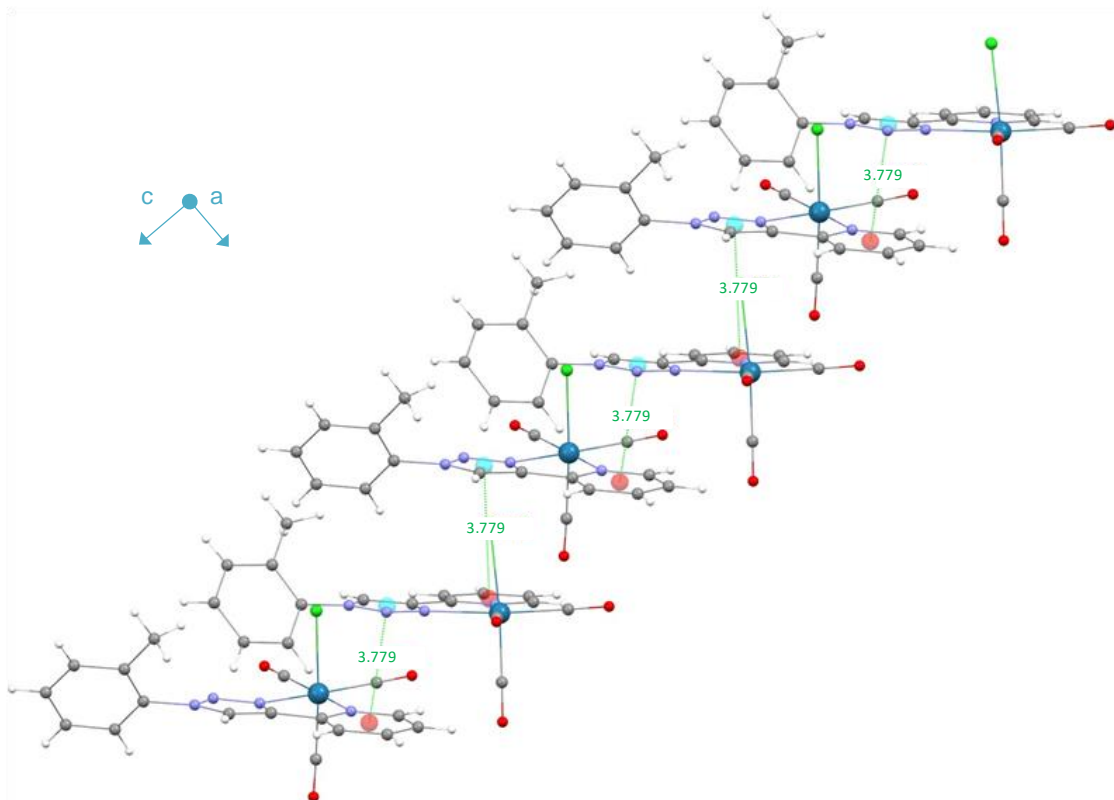

**Figure S24.**  $\pi_{(\text{tz})} \cdots \pi_{(\text{py})}$  interactions in **Re-Tol** (with distances in Å) taking place between the Cg2 centroid (N1/N2/N3/C4/C5) and the Cg3 centroid (N4/C6–C10), with Cg2 $\cdots$ Cg3 distance of 3.779Å.

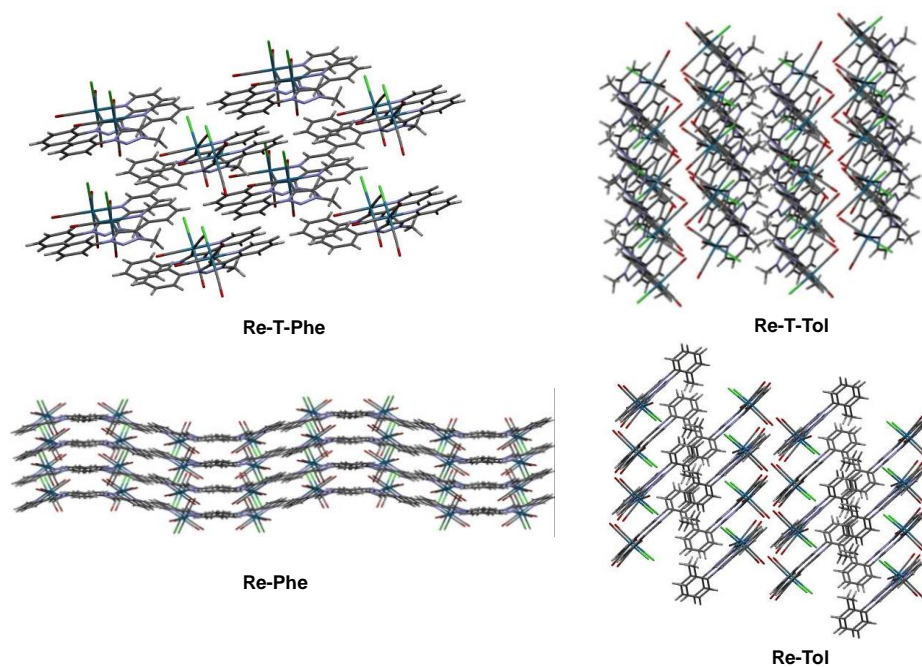

**Figure S25.** Crystal packing ( $2 \times 2 \times 2$ ) of **Re-T-Phe**, **Re-T-Tol**, **Re-Phe** and **Re-Tol**, showing the presence of layers for **Re-T-Tol**, **Re-Phe** and **Re-Tol**.

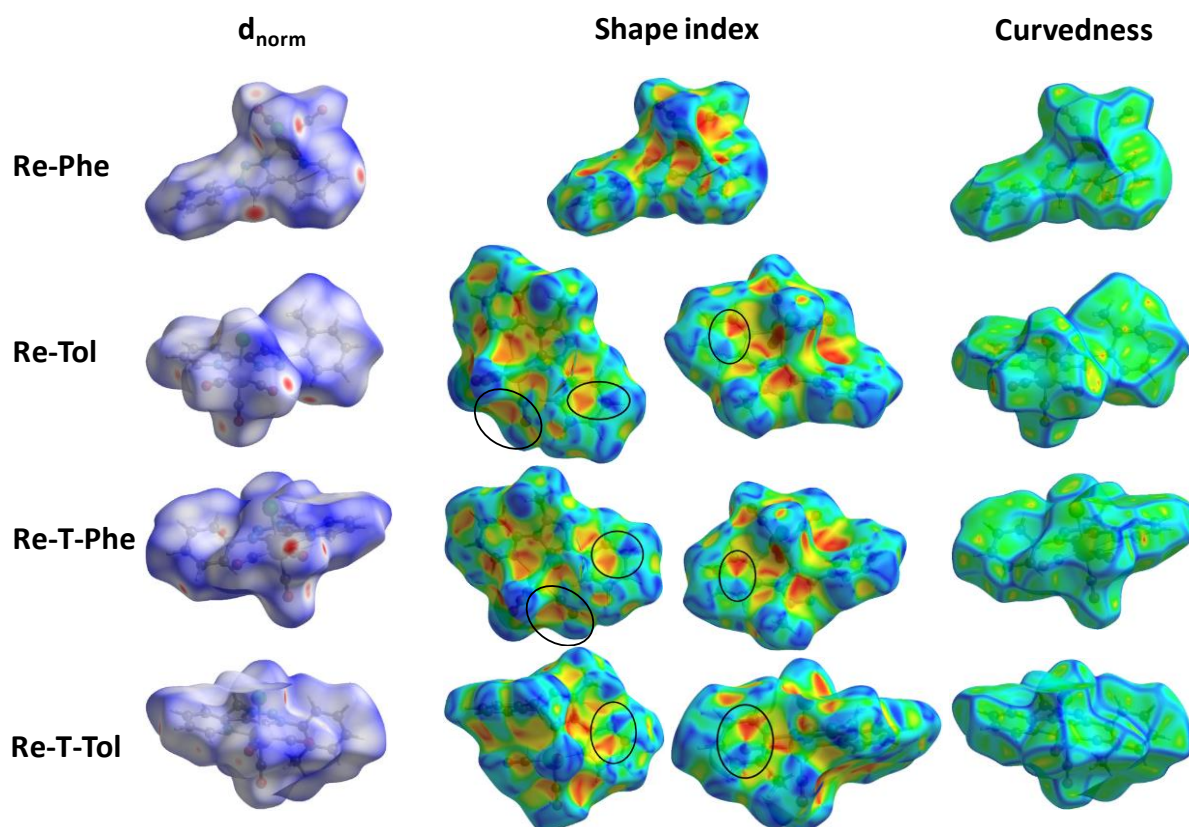

**Figure S26.** Hirshfeld surfaces plotted over the normalized contact distance ( $d_{\text{norm}}$ ), shape index, and curvedness of **Re-Phe**, **Re-Tol**, **Re-T-Phe**, and **Re-T-Tol** (from top to bottom). The adjacent red and blue triangles that reveal  $\pi \cdots \pi$  stacking interactions are highlighted by black circles.

Regarding the  $d_{\text{norm}}$  map, the intensity of the  $d_{\text{norm}}$  point provides a simple visual information about important regions of intermolecular interaction through color mapping. Intermolecular contacts shorter than the sum of the van der Waals radii ( $d_{\text{norm}} < 0$ ) of the interacting atoms are denoted as red spots on the surfaces, whereas longer than the sum of the van der Waals radii ( $d_{\text{norm}} > 0$ ) of the interacting atoms are represented by blue regions. The van der Waals contacts ( $d_{\text{norm}} = 0$ ) are coloured white.

Regarding the explanation of the colors on the shape-index map, the convex blue regions symbolize hydrogen-donor groups and the concave red regions symbolize hydrogen-acceptor groups.

For **Re-Phe**, the HS is generated between  $-0.3555$  a.u. (red spot) and  $1.1732$  a.u. (blue colour); the shape index plot and curvedness plot are generated from  $-0.9973$  to  $0.9962$  a.u. and  $-3.7269$  to  $0.3550$  a.u., respectively

For **Re-Tol**, the colour scale on the HS ranges from  $-0.2502$  a.u. (red spot) and  $1.5401$  a.u. (blue colour). The shape index and curvedness plots are mapped in the colour range between  $-0.9952$  a.u. to  $0.9972$  a.u. and  $-3.3807$  a.u. to  $0.1747$  a.u., respectively.

For **Re-T-Phe**, the HS was generated over a colour scale ranging from  $-0.1444$  (red spot) to  $1.0626$  (blue colour). The shape index and curvedness plots are mapped in the colour range between  $-0.9921$  a.u. to  $0.9973$  a.u. and  $-3.5133$  a.u. to  $0.2804$  a.u., respectively.

For **Re-T-Tol**, the colour scale on the HS ranges from  $-0.1461$  a.u. (red spot) and  $1.4366$  a.u. (blue colour). The shape index and curvedness plots are mapped in the colour range between  $-0.9954$  a.u. to  $0.9963$  a.u. and  $-3.9176$  a.u. to  $0.2727$  a.u., respectively.

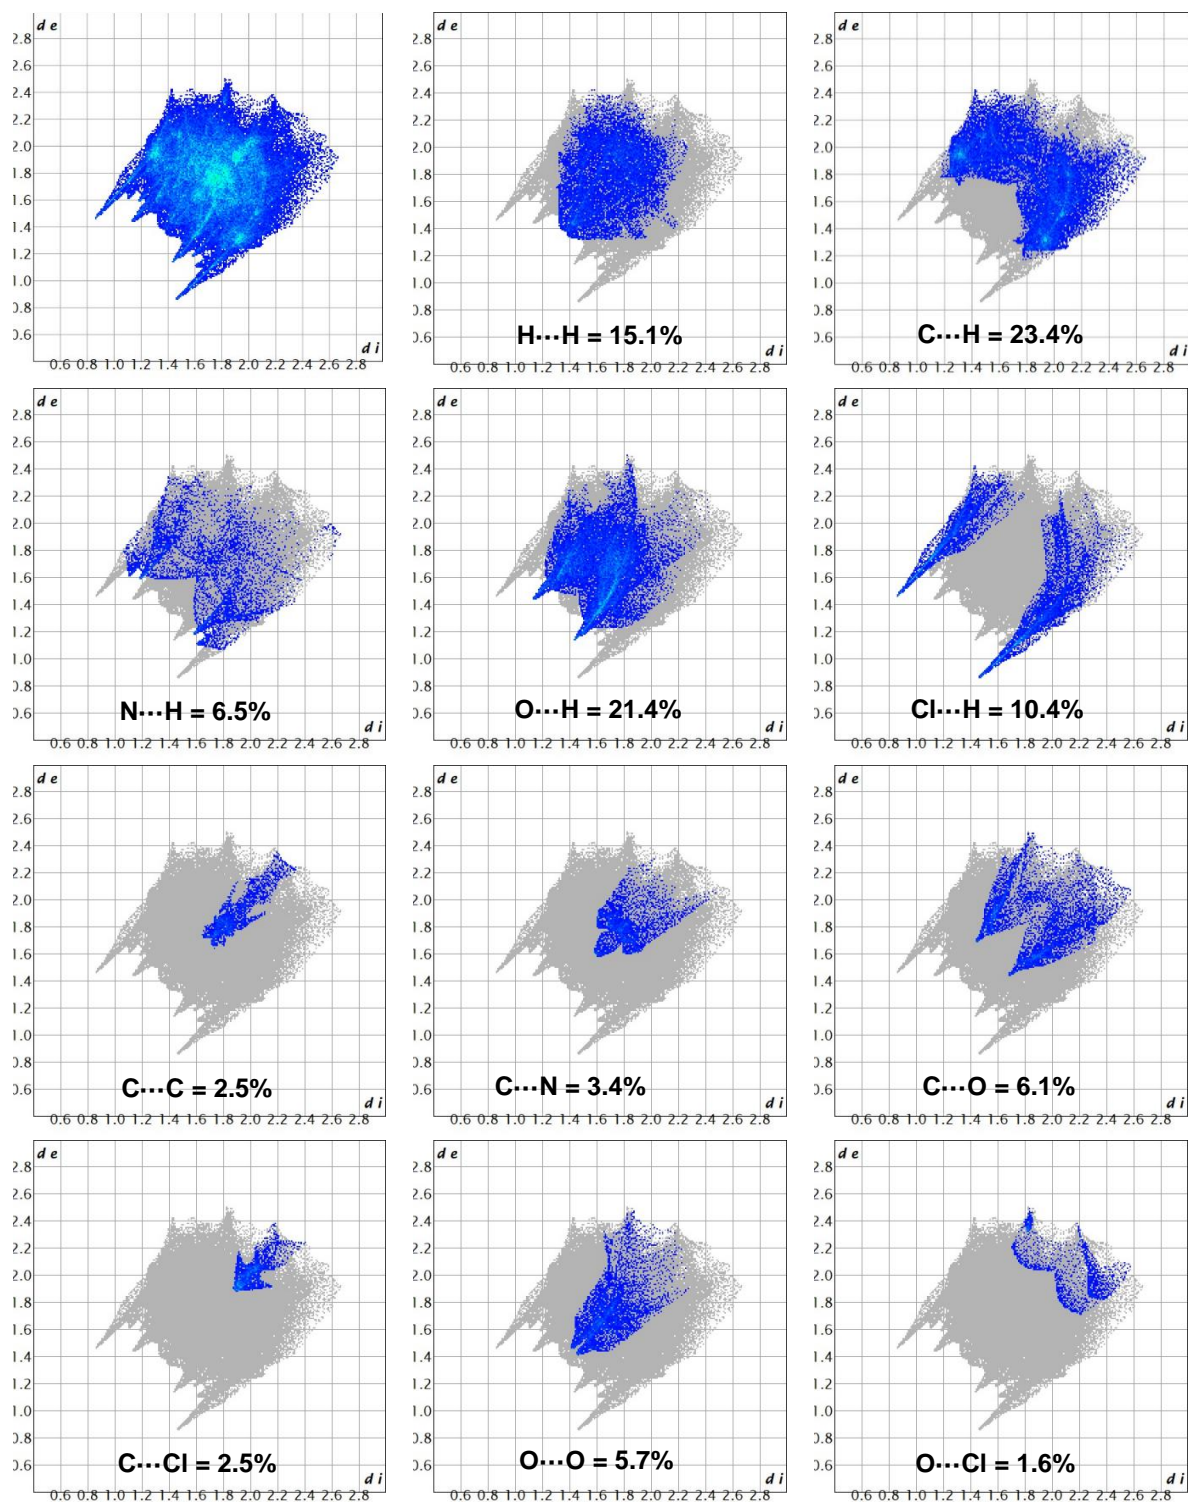

**Figure S27.** Two-dimensional fingerprint plots for overall interactions and individual interactions in crystal packing of **Re-Phe** (Volume = 399.78 Å<sup>3</sup>; Area = 364.93 Å<sup>2</sup>).



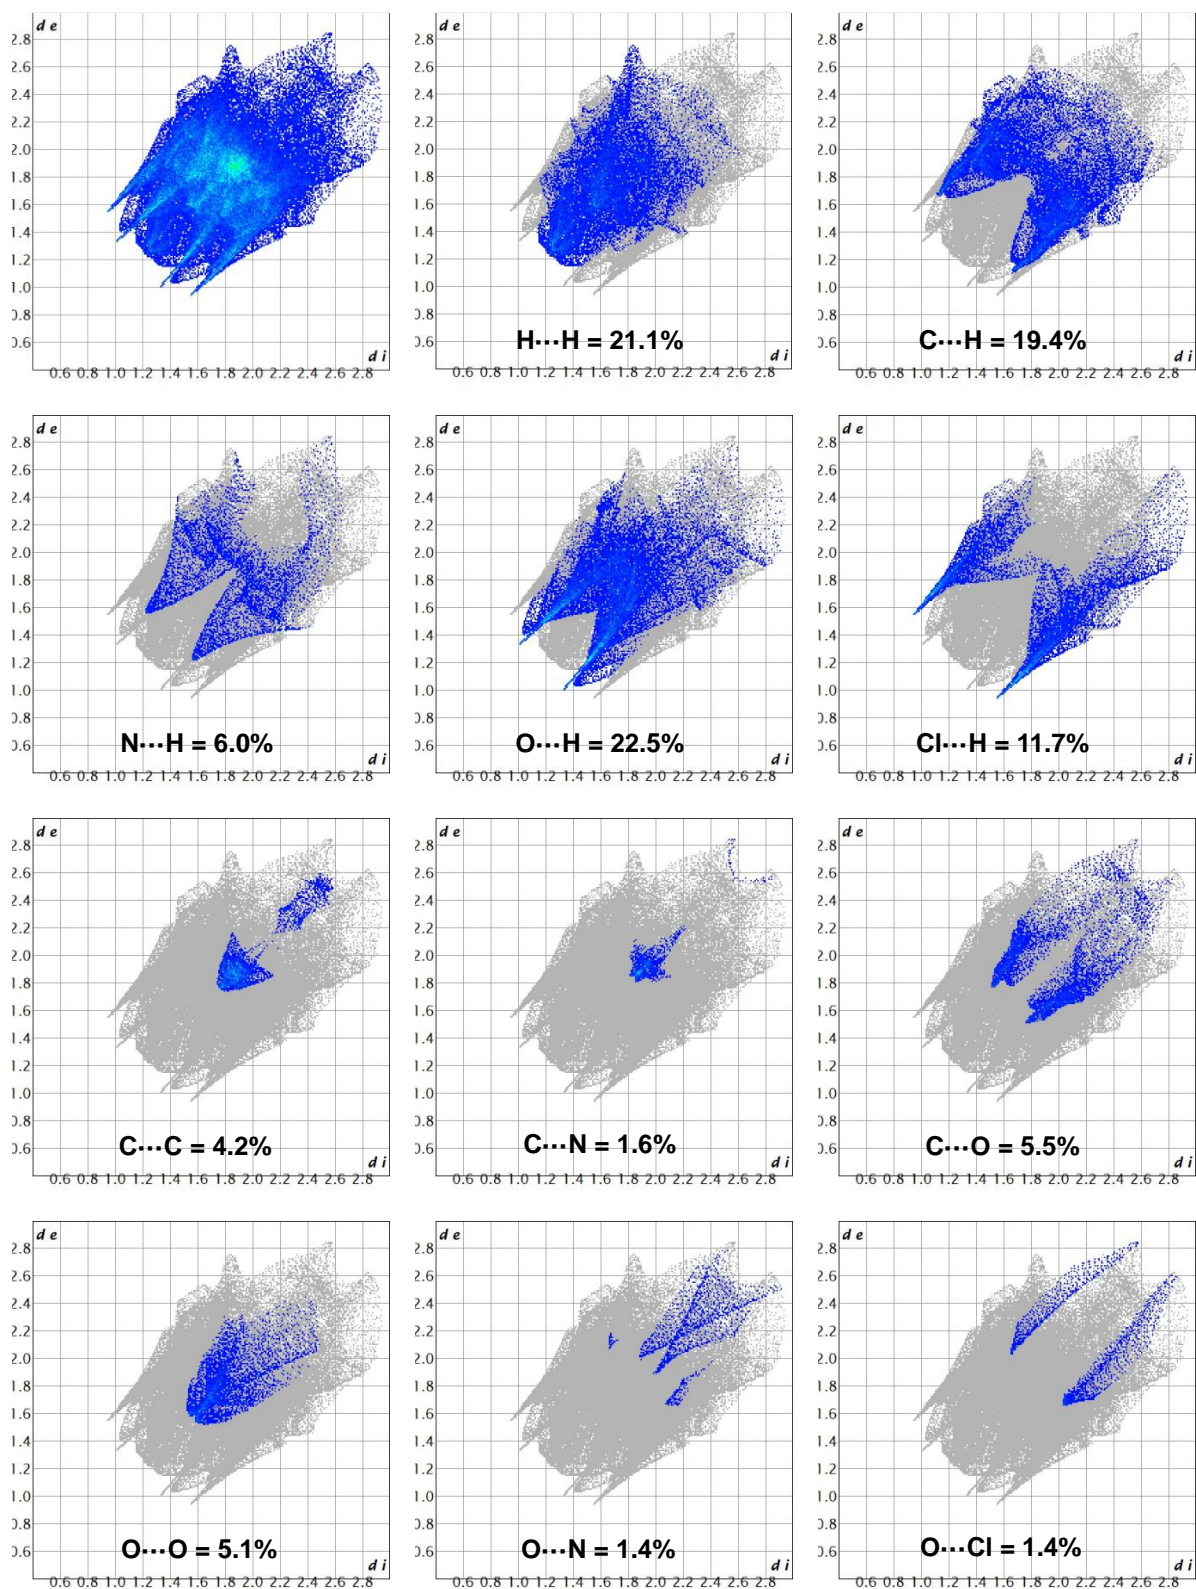

**Figure S28.** Two-dimensional fingerprint plots for overall interactions and individual interactions in crystal packing of **Re-Tol** (Volume = 439.11 Å<sup>3</sup>; Area = 380.12 Å<sup>2</sup>).

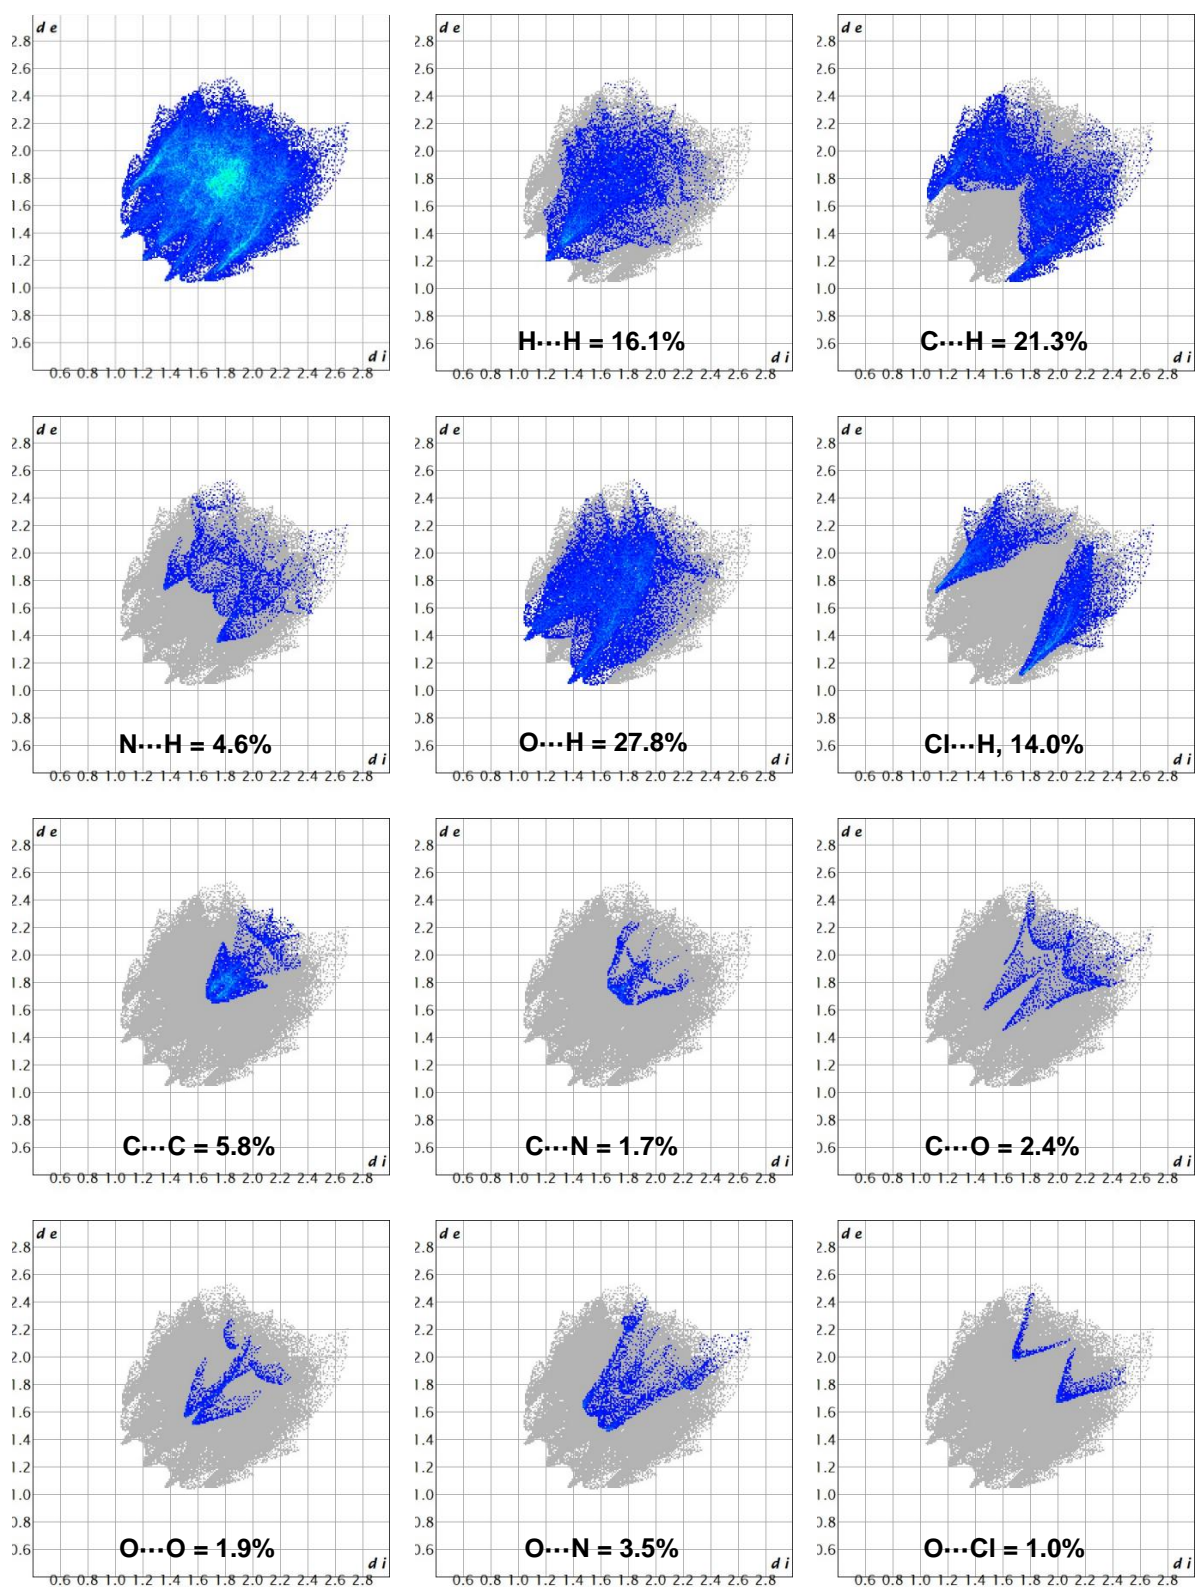

**Figure S29.** Two-dimensional fingerprint plots for overall interactions and individual interactions in crystal packing of **Re-T-Phe** (Volume = 420.65 Å<sup>3</sup>; Area = 365.33 Å<sup>2</sup>).

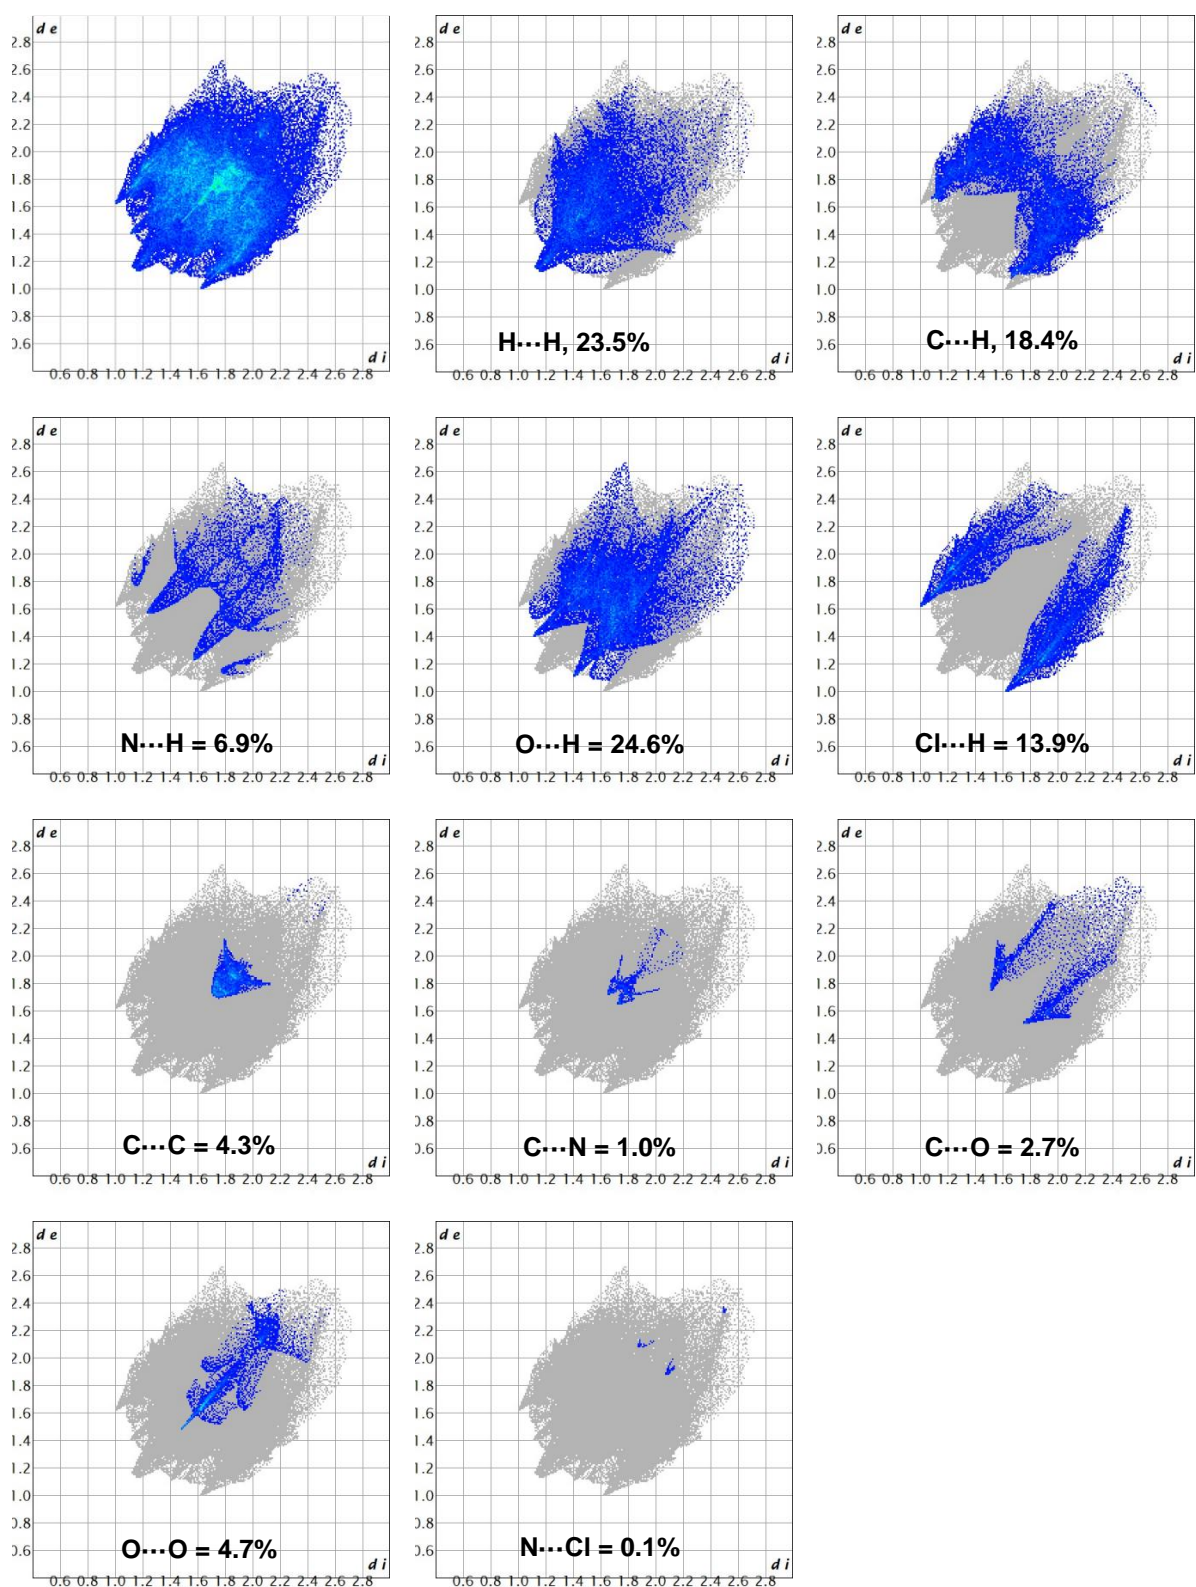

**Figure S30.** Two-dimensional fingerprint plots for overall interactions and individual interactions in crystal packing of **Re-T-Tol** (Volume = 450.50 Å<sup>3</sup>; Area = 378.63 Å<sup>2</sup>).

## Calculations

**Table S9.** Selected calculated bond lengths [Å] and angles [°] in the ground state ( $S_0$ ), first singlet excited state ( $S_1$ ), and first triplet excited state ( $T_1$ ) for **Re-Tol**, together with the experimental data.

| Bond lengths | Exp.      | Optimized |       |                 |       |       | Bond angles      | Exp.       | Optimized |        |                 |        |        |
|--------------|-----------|-----------|-------|-----------------|-------|-------|------------------|------------|-----------|--------|-----------------|--------|--------|
|              |           | gas phase |       | dichloromethane |       |       |                  |            | gas phase |        | dichloromethane |        |        |
|              |           | $S_0$     | $T_1$ | $S_0$           | $S_1$ | $T_1$ |                  |            | $S_0$     | $T_1$  | $S_0$           | $S_1$  | $T_1$  |
| Re(1)-C(1)   | 1.921(3)  | 1.914     | 1.931 | 1.914           | 1.956 | 1.928 | C(2)-Re(1)-C(1)  | 88.08(13)  | 89.79     | 91.84  | 89.56           | 85.25  | 91.17  |
| Re(1)-C(2)   | 1.916(3)  | 1.918     | 1.986 | 1.912           | 1.950 | 1.990 | C(2)-Re(1)-C(3)  | 88.47(13)  | 90.84     | 88.21  | 90.42           | 93.46  | 89.96  |
| Re(1)-C(3)   | 1.932(3)  | 1.904     | 1.952 | 1.897           | 1.955 | 1.949 | C(1)-Re(1)-C(3)  | 91.46(13)  | 91.03     | 90.24  | 90.53           | 90.25  | 88.27  |
| Re(1)-N(1)   | 2.152(2)  | 2.154     | 2.129 | 2.153           | 2.105 | 2.130 | C(2)-Re(1)-N(1)  | 99.97(11)  | 97.68     | 94.76  | 97.56           | 98.18  | 94.94  |
| Re(1)-N(4)   | 2.195(2)  | 2.208     | 2.093 | 2.211           | 2.148 | 2.078 | C(1)-Re(1)-N(1)  | 170.94(11) | 170.13    | 171.27 | 171.60          | 176.43 | 172.10 |
| Re(1)-Cl(1)  | 2.4738(8) | 2.497     | 2.419 | 2.524           | 2.419 | 2.456 | C(3)-Re(1)-N(1)  | 92.87(11)  | 95.29     | 95.67  | 93.86           | 90.53  | 95.22  |
|              |           |           |       |                 |       |       | C(2)-Re(1)-N(4)  | 173.79(11) | 170.94    | 170.57 | 171.27          | 173.99 | 171.16 |
| C(1)-O(1)    | 1.149(4)  | 1.158     | 1.153 | 1.159           | 1.150 | 1.154 | C(1)-Re(1)-N(4)  | 97.47(11)  | 97.55     | 97.16  | 98.13           | 100.30 | 97.36  |
| C(2)-O(2)    | 1.146(4)  | 1.163     | 1.147 | 1.159           | 1.148 | 1.147 | C(3)-Re(1)-N(4)  | 94.13(10)  | 94.32     | 88.94  | 93.62           | 88.84  | 89.41  |
| C(3)-O(3)    | 1.110(4)  | 1.155     | 1.151 | 1.163           | 1.151 | 1.149 | N(1)-Re(1)-N(4)  | 74.29(8)   | 74.45     | 76.58  | 74.46           | 76.24  | 76.78  |
|              |           |           |       |                 |       |       | C(2)-Re(1)-Cl(1) | 92.39(10)  | 92.14     | 87.09  | 92.31           | 91.55  | 87.34  |
|              |           |           |       |                 |       |       | C(1)-Re(1)-Cl(1) | 92.92(9)   | 92.24     | 90.39  | 91.91           | 90.54  | 90.77  |
|              |           |           |       |                 |       |       | C(3)-Re(1)-Cl(1) | 175.55(9)  | 175.58    | 175.28 | 176.35          | 174.97 | 175.56 |
|              |           |           |       |                 |       |       | N(1)-Re(1)-Cl(1) | 82.68(7)   | 81.08     | 84.26  | 83.35           | 88.38  | 84.53  |
|              |           |           |       |                 |       |       | N(4)-Re(1)-Cl(1) | 84.59(6)   | 82.31     | 95.63  | 83.39           | 86.13  | 94.84  |
|              |           |           |       |                 |       |       | O(1)-C(1)-Re(1)  | 177.3(3)   | 178.48    | 179.24 | 179.47          | 178.54 | 179.30 |
|              |           |           |       |                 |       |       | O(2)-C(2)-Re(1)  | 175.4(3)   | 178.77    | 178.38 | 178.93          | 179.83 | 178.54 |
|              |           |           |       |                 |       |       | O(3)-C(3)-Re(1)  | 174.2(4)   | 179.62    | 178.78 | 179.87          | 179.23 | 179.10 |

**Table S10.** Selected calculated bond lengths [ $\text{\AA}$ ] and angles [ $^\circ$ ] in the ground state ( $S_0$ ), first singlet excited state ( $S_1$ ), and first triplet excited state ( $T_1$ ) for **Re-T-Tol**, together with the experimental data.

| Bond lengths | Exp.       | Optimized |       |                 |       |       | Bond angles      | Exp.      | Optimized |        |                 |        |        |
|--------------|------------|-----------|-------|-----------------|-------|-------|------------------|-----------|-----------|--------|-----------------|--------|--------|
|              |            | gas phase |       | dichloromethane |       |       |                  |           | gas phase |        | dichloromethane |        |        |
|              |            | $S_0$     | $T_1$ | $S_0$           | $S_1$ | $T_1$ |                  |           | $S_0$     | $T_1$  | $S_0$           | $S_1$  | $T_1$  |
| Re(1)-C(1)   | 1.897(2)   | 1.901     | 1.944 | 1.893           | 1.948 | 1.934 | C(1)-Re(1)-C(2)  | 88.42(9)  | 89.92     | 90.97  | 90.18           | 91.75  | 90.88  |
| Re(1)-C(2)   | 1.911(2)   | 1.912     | 1.929 | 1.907           | 1.934 | 1.922 | C(1)-Re(1)-C(3)  | 91.76(9)  | 92.29     | 89.40  | 91.59           | 90.99  | 89.99  |
| Re(1)-C(3)   | 1.958(2)   | 1.948     | 2.012 | 1.948           | 1.996 | 2.014 | C(2)-Re(1)-C(3)  | 89.54(10) | 89.57     | 89.66  | 90.14           | 86.10  | 89.35  |
| Re(1)-C(4)   | 2.117(2)   | 2.120     | 2.069 | 2.124           | 2.113 | 2.056 | C(1)-Re(1)-C(4)  | 91.62(8)  | 94.88     | 85.03  | 93.88           | 85.68  | 87.14  |
| Re(1)-N(4)   | 2.2341(17) | 2.238     | 2.199 | 2.240           | 2.177 | 2.198 | C(2)-Re(1)-C(4)  | 98.69(8)  | 100.30    | 99.41  | 98.79           | 100.72 | 98.66  |
| Re(1)-Cl(1)  | 2.5260(5)  | 2.519     | 2.425 | 2.546           | 2.420 | 2.475 | C(3)-Re(1)-C(4)  | 171.19(8) | 167.79    | 169.42 | 169.50          | 172.48 | 171.53 |
|              |            |           |       |                 |       |       | C(1)-Re(1)-N(4)  | 94.35(8)  | 93.05     | 92.767 | 93.39           | 90.55  | 92.28  |
| O(1)-C(1)    | 1.156(3)   | 1.165     | 1.154 | 1.166           | 1.150 | 1.154 | C(2)-Re(1)-N(4)  | 172.88(8) | 174.38    | 174.22 | 172.70          | 176.11 | 174.33 |
| O(2)-C(2)    | 1.151(3)   | 1.158     | 1.153 | 1.161           | 1.154 | 1.156 | C(3)-Re(1)-N(4)  | 96.92(8)  | 95.08     | 94.78  | 96.12           | 97.01  | 95.35  |
| O(3)-C(3)    | 1.145(3)   | 1.157     | 1.147 | 1.159           | 1.149 | 1.147 | C(4)-Re(1)-N(4)  | 74.71(7)  | 74.71     | 76.55  | 74.63           | 76.32  | 76.82  |
|              |            |           |       |                 |       |       | C(1)-Re(1)-Cl(1) | 176.06(6) | 175.58    | 176.47 | 176.67          | 175.42 | 175.81 |
|              |            |           |       |                 |       |       | C(2)-Re(1)-Cl(1) | 95.39(7)  | 93.32     | 91.13  | 92.88           | 91.27  | 91.86  |
|              |            |           |       |                 |       |       | C(3)-Re(1)-Cl(1) | 89.29(7)  | 90.74     | 87.78  | 89.74           | 92.65  | 86.88  |
|              |            |           |       |                 |       |       | C(4)-Re(1)-Cl(1) | 86.81(5)  | 81.60     | 97.42  | 84.34           | 90.38  | 95.57  |
|              |            |           |       |                 |       |       | N(4)-Re(1)-Cl(1) | 81.75(4)  | 83.48     | 85.36  | 83.43           | 86.25  | 85.26  |
|              |            |           |       |                 |       |       | O(1)-C(1)-Re(1)  | 179.2(2)  | 179.14    | 179.40 | 179.85          | 179.00 | 179.85 |
|              |            |           |       |                 |       |       | O(2)-C(2)-Re(1)  | 178.7(2)  | 179.33    | 178.54 | 179.76          | 178.56 | 178.85 |
|              |            |           |       |                 |       |       | O(3)-C(3)-Re(1)  | 178.5(2)  | 178.75    | 178.25 | 179.87          | 177.16 | 178.33 |

**Table S11.** Selected calculated bond lengths [ $\text{\AA}$ ] and angles [ $^\circ$ ] in the ground state ( $S_0$ ), first singlet excited state ( $S_1$ ), and first triplet excited ( $T_1$ ) state for **Re-T-BOP**.

| Bond lengths | Optimized |       |                 |       |       | Bond angles      | Optimized |        |                 |        |        |
|--------------|-----------|-------|-----------------|-------|-------|------------------|-----------|--------|-----------------|--------|--------|
|              | gas phase |       | dichloromethane |       |       |                  | gas phase |        | dichloromethane |        |        |
|              | $S_0$     | $T_1$ | $S_0$           | $S_1$ | $T_1$ |                  | $S_0$     | $T_1$  | $S_0$           | $S_1$  | $T_1$  |
| Re(1)-C(1)   | 1.900     | 1.942 | 1.893           | 1.948 | 1.936 | C(1)-Re(1)-C(2)  | 90.97     | 92.32  | 90.81           | 94.08  | 90.55  |
| Re(1)-C(2)   | 1.913     | 1.930 | 1.908           | 1.934 | 1.922 | C(1)-Re(1)-C(3)  | 92.34     | 89.25  | 91.65           | 89.81  | 89.88  |
| Re(1)-C(3)   | 1.949     | 2.013 | 1.946           | 1.995 | 2.014 | C(2)-Re(1)-C(3)  | 89.79     | 90.29  | 89.67           | 86.11  | 88.62  |
| Re(1)-C(4)   | 2.121     | 2.070 | 2.130           | 2.115 | 2.061 | C(1)-Re(1)-C(4)  | 95.85     | 86.23  | 94.18           | 86.95  | 86.43  |
| Re(1)-N(4)   | 2.231     | 2.197 | 2.236           | 2.175 | 2.197 | C(2)-Re(1)-C(4)  | 99.50     | 98.52  | 99.57           | 99.79  | 99.87  |
| Re(1)-Cl(1)  | 2.516     | 2.424 | 2.547           | 2.421 | 2.470 | C(3)-Re(1)-C(4)  | 167.48    | 170.25 | 168.99          | 173.45 | 170.76 |
|              |           |       |                 |       |       | C(1)-Re(1)-N(4)  | 95.47     | 94.38  | 94.44           | 90.23  | 91.90  |
| O(1)-C(1)    | 1.166     | 1.154 | 1.166           | 1.150 | 1.153 | C(2)-Re(1)-N(4)  | 171.83    | 171.54 | 172.52          | 174.17 | 175.69 |
| O(2)-C(2)    | 1.157     | 1.152 | 1.161           | 1.154 | 1.157 | C(3)-Re(1)-N(4)  | 94.95     | 94.97  | 95.50           | 97.84  | 94.92  |
| O(3)-C(3)    | 1.156     | 1.147 | 1.159           | 1.149 | 1.147 | C(4)-Re(1)-N(4)  | 74.88     | 76.79  | 74.76           | 76.50  | 76.75  |
|              |           |       |                 |       |       | C(1)-Re(1)-Cl(1) | 176.42    | 175.88 | 177.10          | 175.20 | 176.31 |
|              |           |       |                 |       |       | C(2)-Re(1)-Cl(1) | 91.79     | 89.51  | 91.64           | 90.36  | 91.94  |
|              |           |       |                 |       |       | C(3)-Re(1)-Cl(1) | 89.95     | 87.05  | 89.91           | 92.35  | 87.45  |
|              |           |       |                 |       |       | C(4)-Re(1)-Cl(1) | 81.44     | 97.15  | 83.89           | 90.48  | 95.83  |
|              |           |       |                 |       |       | N(4)-Re(1)-Cl(1) | 81.58     | 84.15  | 82.98           | 85.22  | 85.79  |
|              |           |       |                 |       |       | O(1)-C(1)-Re(1)  | 179.14    | 179.27 | 179.74          | 178.86 | 179.75 |
|              |           |       |                 |       |       | O(2)-C(2)-Re(1)  | 179.10    | 178.00 | 178.79          | 178.41 | 178.10 |
|              |           |       |                 |       |       | O(3)-C(3)-Re(1)  | 178.82    | 178.19 | 179.93          | 177.09 | 178.39 |

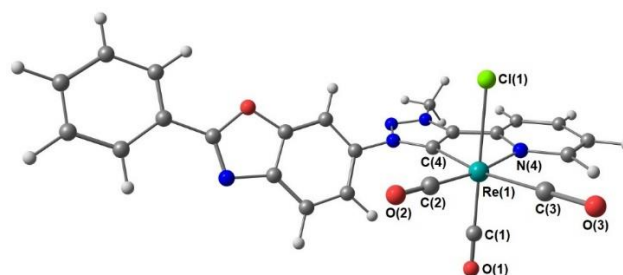

**Figure S31.** DFT-optimized structure of **Re-T-BOP**.

**Table S12.** Dihedral angle values between the triazole or triazolylidene ring and R calculated using the density functional theory (DFT) method at the PBE1PBE/LANL2DZ/6-311+G\*\* level for the ground state  $S_0$ , the first singlet excited state  $S_1$ , and the first triplet excited state  $T_1$  of **Re-Tol**, **Re-T-Tol** and **Re-T-BOP**, and obtained from crystallographic data.

| Complex         | SXRD  | Gas phase |       | DCM   |       |       |
|-----------------|-------|-----------|-------|-------|-------|-------|
|                 |       | $S_0$     | $T_1$ | $S_0$ | $S_1$ | $T_1$ |
| <b>Re-Tol</b>   | 56.25 | 57.20     | 56.95 | 62.15 | 61.97 | 62.83 |
| <b>Re-T-Tol</b> | 81.86 | 66.61     | 66.45 | 88.53 | 71.89 | 72.33 |
| <b>Re-T-BOP</b> | –     | 48.38     | 57.71 | 54.76 | 61.15 | 82.66 |

**Table S13.** The frontier molecular orbital compositions (%) and energy levels for **Re-Tol** (in gas phase).

| Orbital                     |      | Energy (eV) | MO Contribution (%) |    |    |      |    | Main bond type                      |
|-----------------------------|------|-------------|---------------------|----|----|------|----|-------------------------------------|
|                             |      |             | Re                  | CO | Cl | pyta | R  |                                     |
| 100                         | L+5  | -0.49       | 28                  | 10 | 0  | 70   | -6 | p(Re)+ $\pi^*$ (CO)/ $\pi^*$ (pyta) |
| 99                          | L+4  | -0.80       | 2                   | 3  | 0  | 42   | 53 | $\pi^*$ (R)/ $\pi^*$ (pyta)         |
| 98                          | L+3  | -1.05       | 0                   | 0  | 0  | 5    | 95 | $\pi^*$ (R)                         |
| 97                          | L+2  | -1.60       | 0                   | 1  | 0  | 68   | 29 | $\pi^*$ (pyta)/ $\pi^*$ (R)         |
| 96                          | L+1  | -1.86       | 0                   | 1  | 0  | 85   | 13 | $\pi^*$ (pyta)                      |
| 95                          | L    | -2.36       | 2                   | 2  | 1  | 93   | 1  | $\pi^*$ (pyta)                      |
| HOMO–LUMO gap (E = 3.69 eV) |      |             |                     |    |    |      |    |                                     |
| 94                          | H    | -6.05       | 47                  | 21 | 31 | 2    | 0  | d(Re)+ $\pi$ (CO)/ $\pi$ (Cl)       |
| 93                          | H-1  | -6.16       | 45                  | 19 | 34 | 2    | 0  | d(Re)+ $\pi$ (CO)/ $\pi$ (Cl)       |
| 92                          | H-2  | -6.73       | 70                  | 29 | 1  | 0    | 0  | d(Re)+ $\pi$ (CO)                   |
| 91                          | H-3  | -7.43       | 18                  | 6  | 51 | 15   | 9  | $\pi$ (Cl)/ $\pi$ (pyta)            |
| 90                          | H-4  | -7.51       | 26                  | 7  | 59 | 8    | 1  | $\pi$ (Cl)/d(Re)+ $\pi$ (CO)        |
| 89                          | H-5  | -7.85       | 5                   | 2  | 7  | 16   | 71 | $\pi$ (R)/ $\pi$ (pyta)             |
| 88                          | H-6  | -7.94       | 2                   | 1  | 3  | 58   | 37 | $\pi$ (pyta)/ $\pi$ (R)             |
| 87                          | H-7  | -8.13       | 8                   | 13 | 66 | 7    | 6  | $\pi$ (Cl)                          |
| 86                          | H-8  | -8.28       | 2                   | 1  | 8  | 20   | 70 | $\pi$ (R)/ $\pi$ (pyta)             |
| 85                          | H-9  | -9.57       | 2                   | 2  | 2  | 93   | 1  | $\pi$ (pyta)                        |
| 84                          | H-10 | -9.62       | 0                   | 4  | 0  | 94   | 2  | $\pi$ (pyta)                        |

pyta: pyridyl-triazole; R= tolyl ring

**Table S14.** The frontier molecular orbital compositions (%) and energy levels for **Re-Tol** (in dichloromethane).

| Orbital                     |      | Energy (eV) | MO Contribution (%) |    |    |      |    | Main bond type                   |
|-----------------------------|------|-------------|---------------------|----|----|------|----|----------------------------------|
|                             |      |             | Re                  | CO | Cl | pyta | R  |                                  |
| 100                         | L+5  | -0.68       | 35                  | 52 | 0  | 4    | 11 | p(Re)+ $\pi^*$ (CO)/ $\pi^*$ (R) |
| 99                          | L+4  | -0.75       | 2                   | 3  | 0  | 6    | 90 | $\pi^*$ (R)                      |
| 98                          | L+3  | -0.84       | 33                  | 59 | 0  | 6    | 4  | p(Re)+ $\pi^*$ (CO)              |
| 97                          | L+2  | -1.37       | 1                   | 4  | 0  | 82   | 13 | $\pi^*$ (pyta)                   |
| 96                          | L+1  | -1.60       | 1                   | 2  | 0  | 82   | 15 | $\pi^*$ (pyta)                   |
| 95                          | L    | -2.21       | 4                   | 5  | 0  | 90   | 1  | $\pi^*$ (pyta)                   |
| HOMO–LUMO gap (E = 4.43 eV) |      |             |                     |    |    |      |    |                                  |
| 94                          | H    | -6.64       | 53                  | 24 | 20 | 3    | 1  | d(Re)+ $\pi$ (CO)/ $\pi$ (Cl)    |
| 93                          | H-1  | -6.74       | 51                  | 22 | 22 | 3    | 1  | d(Re)+ $\pi$ (CO)/ $\pi$ (Cl)    |
| 92                          | H-2  | -7.19       | 69                  | 30 | 1  | 0    | 0  | d(Re)+ $\pi$ (CO)                |
| 91                          | H-3  | -7.56       | 0                   | 0  | 2  | 24   | 73 | $\pi$ (R)/ $\pi$ (pyta)          |
| 90                          | H-4  | -7.69       | 0                   | 0  | 3  | 49   | 48 | $\pi$ (pyta)/ $\pi$ (R)          |
| 89                          | H-5  | -7.90       | 0                   | 0  | 3  | 32   | 65 | $\pi$ (R)/ $\pi$ (pyta)          |
| 88                          | H-6  | -8.18       | 14                  | 4  | 66 | 15   | 1  | $\pi$ (Cl)/ $\pi$ (pyta)         |
| 87                          | H-7  | -8.24       | 16                  | 5  | 66 | 7    | 6  | $\pi$ (Cl)                       |
| 86                          | H-8  | -8.87       | 8                   | 14 | 69 | 10   | 0  | $\pi$ (Cl)                       |
| 85                          | H-9  | -9.44       | 5                   | 3  | 10 | 81   | 1  | $\pi$ (pyta)                     |
| 84                          | H-10 | -9.46       | 1                   | 1  | 2  | 95   | 2  | $\pi$ (pyta)                     |

pyta: pyridyl-triazole; R= tolyl ring

**Table S15.** The frontier molecular orbital compositions (%) and energy levels for **Re-T-Tol** (in gas phase).

| Orbital                     |      | Energy (eV) | MO Contribution (%) |    |    |       |    | Main bond type          |
|-----------------------------|------|-------------|---------------------|----|----|-------|----|-------------------------|
|                             |      |             | Re                  | CO | Cl | pytrz | R  |                         |
| 104                         | L+5  | -0.48       | 2                   | 4  | 0  | 21    | 73 | $\pi^*(R)/\pi^*(pytrz)$ |
| 103                         | L+4  | -0.56       | 6                   | 5  | -1 | 23    | 68 | $\pi^*(R)/\pi^*(pytrz)$ |
| 102                         | L+3  | -0.63       | 12                  | 5  | 1  | 35    | 48 | $\pi^*(R)/\pi^*(pytrz)$ |
| 101                         | L+2  | -1.27       | 6                   | 4  | 0  | 77    | 13 | $\pi^*(pytrz)/\pi^*(R)$ |
| 100                         | L+1  | -1.84       | 2                   | 2  | 0  | 96    | 1  | $\pi^*(pytrz)$          |
| 99                          | L    | -2.50       | 1                   | 1  | 0  | 97    | 1  | $\pi^*(pytrz)$          |
| HOMO-LUMO gap (E = 3.37 eV) |      |             |                     |    |    |       |    |                         |
| 98                          | H    | -5.87       | 49                  | 22 | 26 | 3     | 1  | $d(Re)+\pi(CO)/\pi(Cl)$ |
| 97                          | H-1  | -5.99       | 47                  | 19 | 31 | 2     | 0  | $d(Re)+\pi(CO)/\pi(Cl)$ |
| 96                          | H-2  | -6.45       | 70                  | 28 | 0  | 0     | 3  | $d(Re)+\pi(CO)$         |
| 95                          | H-3  | -7.07       | 11                  | 5  | 51 | 32    | 2  | $\pi(Cl)/\pi(pytrz)$    |
| 94                          | H-4  | -7.36       | 2                   | 0  | 6  | 1     | 90 | $\pi(R)$                |
| 93                          | H-5  | -7.42       | 22                  | 6  | 58 | 6     | 9  | $\pi(Cl)/d(Re)+\pi(CO)$ |
| 92                          | H-6  | -7.59       | 0                   | 1  | 0  | 10    | 89 | $\pi(R)$                |
| 91                          | H-7  | -7.92       | 13                  | 9  | 45 | 31    | 2  | $\pi(Cl)/\pi(pytrz)$    |
| 90                          | H-8  | -8.14       | 7                   | 8  | 39 | 42    | 4  | $\pi(pytrz)/\pi(Cl)$    |
| 89                          | H-9  | -9.15       | 7                   | 14 | 2  | 75    | 2  | $\pi(pytrz)$            |
| 88                          | H-10 | -9.44       | 4                   | 3  | 3  | 90    | 0  | $\pi(pytrz)$            |

pytrz: pyridyl-triazolylidene; R= tolyl ring

**Table S16.** The frontier molecular orbital compositions (%) and energy levels for **Re-T-Tol** (in dichloromethane).

| Orbital                     |      | Energy (eV) | MO Contribution (%) |    |    |       |    | Main bond type                 |
|-----------------------------|------|-------------|---------------------|----|----|-------|----|--------------------------------|
|                             |      |             | Re                  | CO | Cl | pytrz | R  |                                |
| 104                         | L+5  | -0.54       | 7                   | 9  | 0  | 5     | 79 | $\pi^*(R)$                     |
| 103                         | L+4  | -0.68       | 26                  | 43 | 0  | 17    | 14 | $p(Re)+\pi^*(CO)/\pi^*(pytrz)$ |
| 102                         | L+3  | -0.82       | 1                   | 2  | 0  | 4     | 93 | $\pi^*(R)$                     |
| 101                         | L+2  | -1.16       | 16                  | 16 | -1 | 71    | 0  | $\pi^*(pytrz)/p(Re)+\pi^*(CO)$ |
| 100                         | L+1  | -1.63       | 5                   | 5  | 0  | 92    | 0  | $\pi^*(pytrz)$                 |
| 99                          | L    | -2.29       | 2                   | 2  | 0  | 95    | 1  | $\pi^*(pytrz)$                 |
| HOMO-LUMO gap (E = 4.12 eV) |      |             |                     |    |    |       |    |                                |
| 98                          | H    | -6.41       | 51                  | 23 | 15 | 11    | 0  | $d(Re)+\pi(CO)/\pi(Cl)$        |
| 97                          | H-1  | -6.56       | 53                  | 23 | 20 | 4     | 0  | $d(Re)+\pi(CO)/\pi(Cl)$        |
| 96                          | H-2  | -6.91       | 69                  | 29 | 0  | 0     | 1  | $d(Re)+\pi(CO)$                |
| 95                          | H-3  | -7.45       | 1                   | 1  | 29 | 65    | 4  | $\pi(pytrz)/\pi(Cl)$           |
| 94                          | H-4  | -7.47       | 0                   | 0  | 1  | 3     | 96 | $\pi(R)$                       |
| 93                          | H-5  | -7.79       | 0                   | 0  | 1  | 3     | 96 | $\pi(R)$                       |
| 92                          | H-6  | -8.06       | 14                  | 3  | 71 | 12    | 0  | $\pi(Cl)$                      |
| 91                          | H-7  | -8.16       | 12                  | 7  | 40 | 41    | 1  | $\pi(Cl)/\pi(pytrz)$           |
| 90                          | H-8  | -8.74       | 9                   | 12 | 72 | 6     | 0  | $\pi(Cl)$                      |
| 89                          | H-9  | -9.16       | 4                   | 8  | 1  | 86    | 1  | $\pi(pytrz)$                   |
| 88                          | H-10 | -9.37       | 9                   | 7  | 9  | 76    | 0  | $\pi(pytrz)$                   |

pytrz: pyridyl-triazolylidene; R= tolyl ring



**Table S17.** The frontier molecular orbital compositions (%) and energy levels for **Re-T-BOP** (in gas phase).

| Orbital                              |      | Energy (eV) | MO Contribution (%) |    |    |       |     | Main bond type                                     |
|--------------------------------------|------|-------------|---------------------|----|----|-------|-----|----------------------------------------------------|
|                                      |      |             | Re                  | CO | Cl | pytrz | PBO |                                                    |
| 130                                  | L+5  | -0.59       | 4                   | 0  | 0  | 12    | 83  | $\pi^*(\text{PBO})$                                |
| 129                                  | L+4  | -0.64       | 6                   | 3  | 0  | 9     | 83  | $\pi^*(\text{PBO})$                                |
| 128                                  | L+3  | -1.24       | 7                   | 5  | 0  | 69    | 21  | $\pi^*(\text{pytrz})/\pi^*(\text{PBO})$            |
| 127                                  | L+2  | -1.76       | 0                   | 1  | 0  | 74    | 25  | $\pi^*(\text{pytrz})/\pi^*(\text{PBO})$            |
| 126                                  | L+1  | -2.01       | 1                   | 2  | 0  | 32    | 64  | $\pi^*(\text{PBO})/\pi^*(\text{pytrz})$            |
| 125                                  | L    | -2.51       | 1                   | 1  | 0  | 94    | 4   | $\pi^*(\text{pytrz})$                              |
| HOMO-LUMO gap ( <b>E = 3.35 eV</b> ) |      |             |                     |    |    |       |     |                                                    |
| 124                                  | H    | -5.86       | 48                  | 21 | 29 | 1     | 2   | $d(\text{Re})+\pi(\text{CO})/\pi(\text{Cl})$       |
| 123                                  | H-1  | -6.00       | 46                  | 19 | 33 | 2     | 1   | $d(\text{Re})+\pi(\text{CO})/\pi(\text{Cl})$       |
| 122                                  | H-2  | -6.47       | 69                  | 28 | 0  | 0     | 4   | $d(\text{Re})+\pi(\text{CO})$                      |
| 121                                  | H-3  | -6.77       | 1                   | 1  | 7  | 5     | 86  | $\pi(\text{PBO})$                                  |
| 120                                  | H-4  | -7.05       | 11                  | 5  | 44 | 30    | 10  | $\pi(\text{Cl})/\pi(\text{pytrz})$                 |
| 119                                  | H-5  | -7.33       | 24                  | 7  | 62 | 6     | 0   | $\pi(\text{Cl})/d(\text{Re})+\pi(\text{CO})$       |
| 118                                  | H-6  | -7.58       | 0                   | 0  | 0  | 0     | 99  | $\pi(\text{PBO})$                                  |
| 117                                  | H-7  | -7.71       | 0                   | 0  | 0  | 0     | 100 | $\pi(\text{PBO})$                                  |
| 116                                  | H-8  | -7.90       | 13                  | 10 | 46 | 30    | 2   | $\pi(\text{Cl})/\pi(\text{pytrz})$                 |
| 115                                  | H-9  | -8.07       | 5                   | 6  | 30 | 32    | 26  | $\pi(\text{Cl})/\pi(\text{pytrz})/\pi(\text{PBO})$ |
| 114                                  | H-10 | -8.28       | 3                   | 2  | 9  | 17    | 69  | $\pi(\text{PBO})/\pi(\text{pytrz})$                |

pytrz: pyridyl-triazolylidene; PBO = phenylbenzoxazole

**Table S18.** The frontier molecular orbital compositions (%) and energy levels for **Re-T-BOP** (in dichloromethane).

| Orbital                              |      | Energy (eV) | MO Contribution (%) |    |    |       |     | Main bond type                                     |
|--------------------------------------|------|-------------|---------------------|----|----|-------|-----|----------------------------------------------------|
|                                      |      |             | Re                  | CO | Cl | pytrz | PBO |                                                    |
| 130                                  | L+5  | -0.63       | 12                  | 13 | 0  | 3     | 72  | $\pi^*(\text{PBO})$                                |
| 129                                  | L+4  | -0.74       | 13                  | 28 | 0  | 8     | 51  | $\pi^*(\text{PBO})/p(\text{Re})+\pi^*(\text{CO})$  |
| 128                                  | L+3  | -1.22       | 12                  | 13 | -1 | 68    | 9   | $\pi^*(\text{pytrz})$                              |
| 127                                  | L+2  | -1.63       | 4                   | 4  | 0  | 78    | 14  | $\pi^*(\text{pytrz})$                              |
| 126                                  | L+1  | -2.03       | 1                   | 2  | 0  | 14    | 83  | $\pi^*(\text{PBO})$                                |
| 125                                  | L    | -2.31       | 2                   | 2  | 0  | 93    | 3   | $\pi^*(\text{pytrz})$                              |
| HOMO-LUMO gap ( <b>E = 4.11 eV</b> ) |      |             |                     |    |    |       |     |                                                    |
| 124                                  | H    | -6.42       | 51                  | 23 | 15 | 9     | 2   | $d(\text{Re})+\pi(\text{CO})/\pi(\text{Cl})$       |
| 123                                  | H-1  | -6.58       | 53                  | 23 | 19 | 4     | 1   | $d(\text{Re})+\pi(\text{CO})/\pi(\text{Cl})$       |
| 122                                  | H-2  | -6.86       | 13                  | 5  | 1  | 3     | 78  | $\pi(\text{PBO})$                                  |
| 121                                  | H-3  | -6.94       | 56                  | 24 | 1  | 0     | 18  | $d(\text{Re})+\pi(\text{CO})/\pi(\text{PBO})$      |
| 120                                  | H-4  | -7.46       | 1                   | 1  | 31 | 67    | 1   | $\pi(\text{pytrz})/\pi(\text{Cl})$                 |
| 119                                  | H-5  | -7.64       | 0                   | 0  | 0  | 0     | 99  | $\pi(\text{PBO})$                                  |
| 118                                  | H-6  | -7.73       | 0                   | 0  | 0  | 0     | 99  | $\pi(\text{PBO})$                                  |
| 117                                  | H-7  | -8.05       | 13                  | 4  | 70 | 12    | 1   | $\pi(\text{Cl})$                                   |
| 116                                  | H-8  | -8.12       | 7                   | 4  | 28 | 27    | 34  | $\pi(\text{PBO})/\pi(\text{Cl})/\pi(\text{pytrz})$ |
| 115                                  | H-9  | -8.34       | 6                   | 3  | 15 | 14    | 62  | $\pi(\text{PBO})$                                  |
| 114                                  | H-10 | -8.77       | 9                   | 12 | 71 | 6     | 2   | $\pi(\text{Cl})$                                   |

pytrz: pyridyl-triazolylidene; PBO = phenylbenzoxazole

**Table S19.** The main electronic transitions for **Re-Tol**, calculated with TDDFT method at the PBE1PBE/LANL2DZ level (in gas phase).

| Electronic transition    | Contribution | Assignment                                                                                             |           | $E_{\text{calc}}$<br>/eV | $\lambda_{\text{calc}}$<br>/nm | $f$    |  |
|--------------------------|--------------|--------------------------------------------------------------------------------------------------------|-----------|--------------------------|--------------------------------|--------|--|
| $S_0 \rightarrow S_1$    | H→L          | $d(\text{Re})+\pi(\text{CO})/\pi(\text{Cl}) \rightarrow \pi^*(\text{pyta})$                            | MLCT/LLCT | 2.73                     | 454.8                          | 0.0038 |  |
| $S_0 \rightarrow S_2$    | H-1→L        | $d(\text{Re})+\pi(\text{CO})/\pi(\text{Cl}) \rightarrow \pi^*(\text{pyta})$                            | MLCT/LLCT | 2.92                     | 425.2                          | 0.0431 |  |
| $S_0 \rightarrow S_7$    | H-1→L+2      | $d(\text{Re})+\pi(\text{CO})/\pi(\text{Cl}) \rightarrow \pi^*(\text{pyta})/\pi^*(\text{R})$            | MLCT/LLCT | 3.72                     | 333.3                          | 0.0217 |  |
| $S_0 \rightarrow S_{10}$ | H-4→L        | $\pi(\text{Cl})/d(\text{Re})+\pi(\text{CO}) \rightarrow \pi^*(\text{pyta})$                            | LLCT/MLCT | 4.22                     | 293.7                          | 0.0307 |  |
| $S_0 \rightarrow S_{11}$ | H-2→L+2      | $d(\text{Re})+\pi(\text{CO}) \rightarrow \pi^*(\text{pyta})/\pi^*(\text{R})$                           | MLCT/LLCT | 4.24                     | 292.5                          | 0.0260 |  |
| $S_0 \rightarrow S_{18}$ | H-1→L+4      | $d(\text{Re})+\pi(\text{CO})/\pi(\text{Cl}) \rightarrow \pi^*(\text{R})/\pi^*(\text{pyta})$            | MLCT/LLCT | 4.67                     | 265.8                          | 0.0312 |  |
|                          | H-6→L        | $\pi(\text{pytrz})/\pi(\text{R}) \rightarrow \pi^*(\text{pyta})$                                       | ILCT      |                          |                                |        |  |
| $S_0 \rightarrow S_{20}$ | H-3→L+1      | $\pi(\text{Cl})/\pi(\text{pytrz}) \rightarrow \pi^*(\text{pyta})$                                      | LLCT/ILCT | 4.75                     | 261.1                          | 0.1575 |  |
| $S_0 \rightarrow S_{22}$ | H-4→L+1      | $\pi(\text{Cl})/d(\text{Re})+\pi(\text{CO}) \rightarrow \pi^*(\text{pyta})$                            | LLCT/MLCT | 4.87                     | 254.5                          | 0.0752 |  |
|                          | H-5→L        | $\pi(\text{R})/\pi(\text{pytrz}) \rightarrow \pi^*(\text{pyta})$                                       | ILCT      |                          |                                |        |  |
| $S_0 \rightarrow S_{23}$ | H-7→L        | $\pi(\text{Cl}) \rightarrow \pi^*(\text{pyta})$                                                        | LLCT      | 4.91                     | 252.6                          | 0.0297 |  |
| $S_0 \rightarrow S_{26}$ | H-3→L+2      | $\pi(\text{Cl})/\pi(\text{pyta}) \rightarrow \pi^*(\text{pyta})/\pi^*(\text{R})$                       | LLCT/ILCT | 4.98                     | 248.7                          | 0.1056 |  |
| $S_0 \rightarrow S_{29}$ | H-5→L+1      | $\pi(\text{R})/\pi(\text{pyta}) \rightarrow \pi^*(\text{pyta})$                                        | ILCT      | 5.10                     | 243.0                          | 0.0629 |  |
|                          | H-5→L+2      | $\pi(\text{R})/\pi(\text{pyta}) \rightarrow \pi^*(\text{pyta})/\pi^*(\text{R})$                        | ILCT      |                          |                                |        |  |
| $S_0 \rightarrow S_{30}$ | H-4→L+2      | $\pi(\text{Cl})/d(\text{Re})+\pi(\text{CO}) \rightarrow \pi^*(\text{pyta})/\pi^*(\text{R})$            | LLCT/MLCT | 5.13                     | 241.8                          | 0.2121 |  |
| $S_0 \rightarrow S_{35}$ | H-8→L        | $\pi(\text{R})/\pi(\text{pyta}) \rightarrow \pi^*(\text{pyta})$                                        | ILCT      | 5.36                     | 231.1                          | 0.1096 |  |
| $S_0 \rightarrow S_{37}$ | H-7→L+1      | $\pi(\text{Cl}) \rightarrow \pi^*(\text{pyta})$                                                        | LLCT      | 5.46                     | 227.3                          | 0.0214 |  |
| $S_0 \rightarrow S_{38}$ | H→L+8        | $d(\text{Re})+\pi(\text{CO})/\pi(\text{Cl}) \rightarrow \pi^*(\text{pyta})$                            | MLCT/LLCT | 5.49                     | 226.0                          | 0.0212 |  |
| $S_0 \rightarrow S_{43}$ | H-5→L+2      | $\pi(\text{R})/\pi(\text{pyta}) \rightarrow \pi^*(\text{pyta})/\pi^*(\text{R})$                        | ILCT      | 5.60                     | 221.6                          | 0.0217 |  |
| $S_0 \rightarrow S_{45}$ | H-6→L+2      | $\pi(\text{pyta})/\pi(\text{R}) \rightarrow \pi^*(\text{pyta})/\pi^*(\text{R})$                        | ILCT      | 5.69                     | 218.0                          | 0.0442 |  |
| $S_0 \rightarrow S_{71}$ | H-1→L+12     | $d(\text{Re})+\pi(\text{CO})/\pi(\text{Cl}) \rightarrow p(\text{Re})+\pi^*(\text{CO})/\pi^*(\text{R})$ | MLCT/LLCT | 6.17                     | 201.0                          | 0.0314 |  |

MLCT: metal-to-ligand charge transfer; LMCT: ligand-to-metal charge transfer; LLCT: ligand-to-ligand charge transfer; ILCT: intraligand charge transfer. pyta: pyridyl-triazole; R= tolyl ring

**Table S20.** The main electronic transitions for **Re-Tol**, calculated with TDDFT method at the PBE1PBE/LANL2DZ level (in dichloromethane).

| Electronic transition    | Contribution | Assignment                                                                                 |           | $E_{\text{calc}}$<br>/eV | $\lambda_{\text{calc}}$<br>/nm | $f$    | $\lambda_{\text{exp}}$<br>/nm |
|--------------------------|--------------|--------------------------------------------------------------------------------------------|-----------|--------------------------|--------------------------------|--------|-------------------------------|
| $S_0 \rightarrow S_1$    | H→L          | $d(\text{Re})+\pi(\text{CO})/\pi(\text{Cl}) \rightarrow \pi^*(\text{pya})$                 | MLCT/LLCT | 3.43                     | 361.7                          | 0.0043 |                               |
| $S_0 \rightarrow S_2$    | H-1→L        | $d(\text{Re})+\pi(\text{CO})/\pi(\text{Cl}) \rightarrow \pi^*(\text{pya})$                 | MLCT/LLCT | 3.60                     | 344.5                          | 0.0914 | 344                           |
| $S_0 \rightarrow S_{11}$ | H-3→L        | $\pi(\text{R})/\pi(\text{pyta}) \rightarrow \pi^*(\text{pyta})$                            | ILCT      | 4.62                     | 268.3                          | 0.3443 | 276                           |
| $S_0 \rightarrow S_{17}$ | H-5→L        | $\pi(\text{R})/\pi(\text{pyta}) \rightarrow \pi^*(\text{pyta})$                            | ILCT      | 4.98                     | 248.8                          | 0.0891 |                               |
|                          | H-6→L        | $\pi(\text{Cl})/\pi(\text{pyta}) \rightarrow \pi^*(\text{pyta})$                           | LLCT/ILCT |                          |                                |        |                               |
| $S_0 \rightarrow S_{19}$ | H-2→L+3      | $d(\text{Re})+\pi(\text{CO}) \rightarrow p(\text{Re})+\pi^*(\text{CO})$                    | MLCT/ILCT | 5.08                     | 244.2                          | 0.0772 |                               |
| $S_0 \rightarrow S_{22}$ | H-4→L+1      | $\pi(\text{pyta})/\pi(\text{R}) \rightarrow \pi^*(\text{pyta})$                            | ILCT      | 5.24                     | 236.7                          | 0.2726 | 240                           |
| $S_0 \rightarrow S_{26}$ | H-1→L+4      | $d(\text{Re})+\pi(\text{CO})/\pi(\text{Cl}) \rightarrow \pi^*(\text{R})$                   | MLCT/LLCT | 5.44                     | 228.1                          | 0.0552 |                               |
|                          | H-5→L+1      | $\pi(\text{R})/\pi(\text{pyta}) \rightarrow \pi^*(\text{pyta})$                            | ILCT      |                          |                                |        |                               |
| $S_0 \rightarrow S_{40}$ | H-5→L+2      | $\pi(\text{R})/\pi(\text{pyta}) \rightarrow \pi^*(\text{pyta})$                            | ILCT      | 5.88                     | 211.0                          | 0.0645 |                               |
| $S_0 \rightarrow S_{50}$ | H-3→L+5      | $\pi(\text{R})/\pi(\text{pyta}) \rightarrow p(\text{Re})+\pi^*(\text{CO})/\pi^*(\text{R})$ | LLCT/ILCT | 6.15                     | 201.8                          | 0.0635 |                               |
|                          | H-4→L+5      | $\pi(\text{pyta})/\pi(\text{R}) \rightarrow p(\text{Re})+\pi^*(\text{CO})/\pi^*(\text{R})$ | LLCT/ILCT |                          |                                |        |                               |

MLCT: metal-to-ligand charge transfer; LMCT: ligand-to-metal charge transfer; LLCT: ligand-to-ligand charge transfer; ILCT: intraligand charge transfer. pyta: pyridyl-triazole; R= tolyl ring.

**Table S21.** The main electronic transitions for **Re-T-Tol** calculated with TDDFT method at the PBE1PBE/LANL2DZ level (in gas phase).

| Electronic transition    | Contribution | Assignment                                                                                                 |           | $E_{\text{calc}}$<br>/eV | $\lambda_{\text{calc}}$<br>/nm | $f$    |
|--------------------------|--------------|------------------------------------------------------------------------------------------------------------|-----------|--------------------------|--------------------------------|--------|
| $S_0 \rightarrow S_1$    | H→L          | $d(\text{Re})+\pi(\text{CO})/\pi(\text{Cl}) \rightarrow \pi^*(\text{pytrz})$                               | MLCT/LLCT | 2.46                     | 504.0                          | 0.0014 |
| $S_0 \rightarrow S_2$    | H-1→L        | $d(\text{Re})+\pi(\text{CO})/\pi(\text{Cl}) \rightarrow \pi^*(\text{pytrz})$                               | MLCT/LLCT | 2.64                     | 470.4                          | 0.0286 |
| $S_0 \rightarrow S_8$    | H-3→L        | $\pi(\text{Cl})/\pi(\text{pytrz}) \rightarrow \pi^*(\text{pytrz})$                                         | LLCT/ILCT | 3.74                     | 331.8                          | 0.0488 |
| $S_0 \rightarrow S_{10}$ | H-5→L        | $\pi(\text{Cl})/d(\text{Re})+\pi(\text{CO}) \rightarrow \pi^*(\text{pytrz})$                               | LLCT/MLCT | 4.02                     | 308.3                          | 0.0313 |
| $S_0 \rightarrow S_{18}$ | H-7→L        | $\pi(\text{Cl})/\pi(\text{pytrz}) \rightarrow \pi^*(\text{pytrz})$                                         | LLCT/ILCT | 4.60                     | 269.8                          | 0.0763 |
| $S_0 \rightarrow S_{27}$ | H-1→L+5      | $d(\text{Re})+\pi(\text{CO})/\pi(\text{Cl}) \rightarrow \pi^*(\text{R})/\pi^*(\text{pytrz})$               | MLCT/LLCT | 4.86                     | 255.2                          | 0.1034 |
|                          | H-8→L        | $\pi(\text{pytrz})/\pi(\text{Cl}) \rightarrow \pi^*(\text{pytrz})$                                         | ILCT/LLCT |                          |                                |        |
| $S_0 \rightarrow S_{29}$ | H-3→L+2      | $\pi(\text{Cl})/\pi(\text{pytrz}) \rightarrow \pi^*(\text{pytrz})/\pi^*(\text{R})$                         | LLCT/ILCT | 4.92                     | 252.1                          | 0.0380 |
| $S_0 \rightarrow S_{30}$ | H-1→L+7      | $d(\text{Re})+\pi(\text{CO})/\pi(\text{Cl}) \rightarrow p(\text{Re})+\pi^*(\text{CO})/\pi^*(\text{pytrz})$ | MLCT/LLCT | 4.95                     | 250.7                          | 0.0457 |
| $S_0 \rightarrow S_{31}$ | H-2→L+4      | $d(\text{Re})+\pi(\text{CO}) \rightarrow \pi^*(\text{R})/\pi^*(\text{pytrz})$                              | MLCT/LLCT | 5.08                     | 243.9                          | 0.0411 |
|                          | H-6→L+1      | $\pi(\text{R}) \rightarrow \pi^*(\text{pytrz})$                                                            | ILCT      |                          |                                |        |
| $S_0 \rightarrow S_{33}$ | H-5→L+2      | $\pi(\text{Cl})/d(\text{Re})+\pi(\text{CO}) \rightarrow \pi^*(\text{pytrz})/\pi^*(\text{R})$               | LLCT/MLCT | 5.20                     | 238.7                          | 0.0556 |
| $S_0 \rightarrow S_{46}$ | H-9→L        | $\pi(\text{pytrz}) \rightarrow \pi^*(\text{pytrz})$                                                        | ILCT      | 5.48                     | 226.2                          | 0.0690 |
| $S_0 \rightarrow S_{55}$ | H-7→L+2      | $\pi(\text{Cl})/\pi(\text{pytrz}) \rightarrow \pi^*(\text{pytrz})/\pi^*(\text{R})$                         | LLCT/ILCT | 5.78                     | 214.6                          | 0.0304 |
|                          | H-3→L+4      | $\pi(\text{Cl})/\pi(\text{pytrz}) \rightarrow \pi^*(\text{R})/\pi^*(\text{pytrz})$                         | LLCT/ILCT |                          |                                |        |
| $S_0 \rightarrow S_{78}$ | H-10→L       | $\pi(\text{pytrz}) \rightarrow \pi^*(\text{pytrz})$                                                        | ILCT      | 6.20                     | 200.0                          | 0.0325 |
|                          | H-8→L+2      | $\pi(\text{pytrz})/\pi(\text{Cl}) \rightarrow \pi^*(\text{pytrz})/\pi^*(\text{R})$                         | ILCT/LLCT |                          |                                |        |

MLCT: metal-to-ligand charge transfer; LMCT: ligand-to-metal charge transfer; LLCT: ligand-to-ligand charge transfer; ILCT: intraligand charge transfer. pytrz: pyridyl-triazolylidene; R= tolyl ring.

**Table S22.** The main electronic transitions for **Re-T-Tol** calculated with TDDFT method at the PBE1PBE/LANL2DZ level (in dichloromethane).

| Electronic transition    | Contribution | Assignment                                                                                             |           | $E_{\text{calc}}$<br>/eV | $\lambda_{\text{calc}}$<br>/nm | $f$    | $\lambda_{\text{exp}}$<br>/nm |
|--------------------------|--------------|--------------------------------------------------------------------------------------------------------|-----------|--------------------------|--------------------------------|--------|-------------------------------|
| $S_0 \rightarrow S_1$    | H→L          | $d(\text{Re})+\pi(\text{CO})/\pi(\text{Cl}) \rightarrow \pi^*(\text{pytrz})$                           | MLCT/LLCT | 3.19                     | 389.2                          | 0.0071 |                               |
| $S_0 \rightarrow S_2$    | H-1→L        | $d(\text{Re})+\pi(\text{CO})/\pi(\text{Cl}) \rightarrow \pi^*(\text{pytrz})$                           | MLCT/LLCT | 3.39                     | 366.2                          | 0.0747 | 354                           |
| $S_0 \rightarrow S_9$    | H-3→L        | $\pi(\text{pytrz})/\pi(\text{Cl}) \rightarrow \pi^*(\text{pytrz})$                                     | ILCT/LLCT | 4.35                     | 285.1                          | 0.1271 | 290                           |
| $S_0 \rightarrow S_{21}$ | H-2→L+4      | $d(\text{Re})+\pi(\text{CO}) \rightarrow p(\text{Re})+\pi^*(\text{CO})/\pi^*(\text{pytrz})$            | MLCT/LLCT | 5.06                     | 244.9                          | 0.1992 | 240                           |
| $S_0 \rightarrow S_{28}$ | H-3→L+2      | $\pi(\text{pytrz})/\pi(\text{Cl}) \rightarrow \pi^*(\text{pytrz})/p(\text{Re})+\pi^*(\text{CO})$       | ILCT/LLCT | 5.37                     | 231.1                          | 0.0446 |                               |
|                          | H-2→L+3      | $d(\text{Re})+\pi(\text{CO}) \rightarrow \pi^*(\text{R})$                                              | MLCT/LLCT |                          |                                |        |                               |
| $S_0 \rightarrow S_{48}$ | H-7→L+2      | $\pi(\text{Cl})/\pi(\text{pytrz}) \rightarrow \pi^*(\text{pytrz})/p(\text{Re})+\pi^*(\text{CO})$       | LLCT/ILCT | 5.97                     | 207.8                          | 0.0413 |                               |
|                          | H→L+18       | $d(\text{Re})+\pi(\text{CO})/\pi(\text{Cl}) \rightarrow p(\text{Re})+\pi^*(\text{CO})/\pi^*(\text{R})$ | MLCT/LLCT |                          |                                |        |                               |
| $S_0 \rightarrow S_{60}$ | H-10→L       | $\pi(\text{pytrz}) \rightarrow \pi^*(\text{pytrz})$                                                    | ILCT      | 6.23                     | 199.0                          | 0.0563 |                               |
|                          | H-7→L+2      | $\pi(\text{Cl})/\pi(\text{pytrz}) \rightarrow \pi^*(\text{pytrz})/p(\text{Re})+\pi^*(\text{CO})$       | LLCT/ILCT |                          |                                |        |                               |

MLCT: metal-to-ligand charge transfer; LMCT: ligand-to-metal charge transfer; LLCT: ligand-to-ligand charge transfer; ILCT: intraligand charge transfer. pytrz: pyridyl-triazolylidene; R= tolyl ring.

**Table S23.** The main electronic transitions for **Re-T-BOP** calculated with TDDFT method at the PBE1PBE/LANL2DZ level (in gas phase).

| Electronic transition     | Contribution | Assignment                                                                                               |           | $E_{\text{calc}}$<br>/eV | $\lambda_{\text{calc}}$<br>/nm | $f$    |  |
|---------------------------|--------------|----------------------------------------------------------------------------------------------------------|-----------|--------------------------|--------------------------------|--------|--|
| $S_0 \rightarrow S_1$     | H→L          | $d(\text{Re})+\pi(\text{CO})/\pi(\text{Cl}) \rightarrow \pi^*(\text{pytrz})$                             | MLCT/LLCT | 2.45                     | 506.0                          | 0.0014 |  |
| $S_0 \rightarrow S_2$     | H-1→L        | $d(\text{Re})+\pi(\text{CO})/\pi(\text{Cl}) \rightarrow \pi^*(\text{pytrz})$                             | MLCT/LLCT | 2.64                     | 469.1                          | 0.0327 |  |
| $S_0 \rightarrow S_8$     | H-3→L        | $\pi(\text{PBO}) \rightarrow \pi^*(\text{pytrz})$                                                        | ILCT      | 3.60                     | 344.8                          | 0.1891 |  |
| $S_0 \rightarrow S_{13}$  | H-5→L        | $\pi(\text{Cl})/d(\text{Re})+\pi(\text{CO}) \rightarrow \pi^*(\text{pytrz})$                             | LLCT/MLCT | 3.93                     | 315.4                          | 0.0277 |  |
| $S_0 \rightarrow S_{15}$  | H-3→L+1      | $\pi(\text{PBO}) \rightarrow \pi^*(\text{PBO})/\pi^*(\text{pytrz})$                                      | ILCT      | 4.15                     | 298.6                          | 0.7859 |  |
| $S_0 \rightarrow S_{17}$  | H-2→L+3      | $d(\text{Re})+\pi(\text{CO}) \rightarrow \pi^*(\text{pytrz})/\pi^*(\text{PBO})$                          | MLCT/LLCT | 4.30                     | 288.5                          | 0.0264 |  |
| $S_0 \rightarrow S_{20}$  | H-6→L        | $\pi(\text{PBO}) \rightarrow \pi^*(\text{pytrz})$                                                        | ILCT      | 4.39                     | 282.2                          | 0.0255 |  |
|                           | H-1→L+7      | $d(\text{Re})+\pi(\text{CO})/\pi(\text{Cl}) \rightarrow p(\text{Re})+\pi^*(\text{CO})/\pi^*(\text{PBO})$ | MLCT/LLCT |                          |                                |        |  |
| $S_0 \rightarrow S_{23}$  | H-8→L        | $\pi(\text{Cl})/\pi(\text{pytrz}) \rightarrow \pi^*(\text{pytrz})$                                       | LLCT/ILCT | 4.55                     | 272.8                          | 0.0265 |  |
| $S_0 \rightarrow S_{25}$  | H-4→L+2      | $\pi(\text{Cl})/\pi(\text{pytrz}) \rightarrow \pi^*(\text{pytrz})/\pi^*(\text{PBO})$                     | LLCT/ILCT | 4.62                     | 268.4                          | 0.1517 |  |
| $S_0 \rightarrow S_{31}$  | H-6→L+1      | $\pi(\text{PBO}) \rightarrow \pi^*(\text{PBO})/\pi^*(\text{pytrz})$                                      | ILCT      | 4.80                     | 258.2                          | 0.0407 |  |
| $S_0 \rightarrow S_{33}$  | H-5→L+2      | $\pi(\text{Cl})/d(\text{Re})+\pi(\text{CO}) \rightarrow \pi^*(\text{pytrz})/\pi^*(\text{PBO})$           | LLCT/MLCT | 4.89                     | 253.5                          | 0.0523 |  |
| $S_0 \rightarrow S_{38}$  | H-2→L+7      | $d(\text{Re})+\pi(\text{CO}) \rightarrow p(\text{Re})+\pi^*(\text{CO})/\pi^*(\text{PBO})$                | MLCT/LLCT | 4.94                     | 250.9                          | 0.0347 |  |
| $S_0 \rightarrow S_{41}$  | H-4→L+3      | $\pi(\text{Cl})/\pi(\text{pytrz}) \rightarrow \pi^*(\text{pytrz})/\pi^*(\text{PBO})$                     | LLCT/ILCT | 5.08                     | 243.9                          | 0.0836 |  |
| $S_0 \rightarrow S_{55}$  | H-3→L+4      | $\pi(\text{PBO}) \rightarrow \pi^*(\text{PBO})$                                                          | ILCT      | 5.42                     | 228.7                          | 0.0271 |  |
| $S_0 \rightarrow S_{58}$  | H-8→L+2      | $\pi(\text{Cl})/\pi(\text{pytrz}) \rightarrow \pi^*(\text{pytrz})/\pi^*(\text{PBO})$                     | LLCT/ILCT | 5.47                     | 226.6                          | 0.0249 |  |
| $S_0 \rightarrow S_{69}$  | H-6→L+3      | $\pi(\text{PBO}) \rightarrow \pi^*(\text{pytrz})/\pi^*(\text{PBO})$                                      | ILCT      | 5.68                     | 218.3                          | 0.0530 |  |
| $S_0 \rightarrow S_{71}$  | H-6→L+3      | $\pi(\text{PBO}) \rightarrow \pi^*(\text{pytrz})/\pi^*(\text{PBO})$                                      | ILCT      | 5.71                     | 217.0                          | 0.0260 |  |
|                           | H-10→L+1     | $\pi(\text{PBO})/\pi(\text{pytrz}) \rightarrow \pi^*(\text{PBO})/\pi^*(\text{pytrz})$                    | ILCT      |                          |                                |        |  |
| $S_0 \rightarrow S_{103}$ | H-9→L+3      | $\pi(\text{Cl})/\pi(\text{pytrz})/\pi(\text{PBO}) \rightarrow \pi^*(\text{pytrz})/\pi^*(\text{PBO})$     | LLCT/ILCT | 6.19                     | 200.1                          | 0.0298 |  |
|                           | H-12→L+1     | $\pi(\text{pytrz}) \rightarrow \pi^*(\text{PBO})/\pi^*(\text{pytrz})$                                    | ILCT      |                          |                                |        |  |

MLCT: metal-to-ligand charge transfer; LMCT: ligand-to-metal charge transfer; LLCT: ligand-to-ligand charge transfer; ILCT: intraligand charge transfer. pytrz: pyridyl-triazolylidene; PBO= phenylbenzoxazole.

**Table S24.** The main electronic transitions for **Re-T-BOP** calculated with TDDFT method at the PBE1PBE/LANL2DZ level (in dichloromethane).

| Electronic transition    | Contribution | Assignment                                                                                      |                | $E_{\text{calc}}$<br>/eV | $\lambda_{\text{calc}}$<br>/nm | $f$    | $\lambda_{\text{exp}}$<br>/nm |
|--------------------------|--------------|-------------------------------------------------------------------------------------------------|----------------|--------------------------|--------------------------------|--------|-------------------------------|
| $S_0 \rightarrow S_1$    | H→L          | $d(\text{Re})+\pi(\text{CO})/\pi(\text{Cl}) \rightarrow \pi^*(\text{pytrz})$                    | MLCT/LLCT      | 3.19                     | 389.3                          | 0.0095 |                               |
| $S_0 \rightarrow S_2$    | H-1→L        | $d(\text{Re})+\pi(\text{CO})/\pi(\text{Cl}) \rightarrow \pi^*(\text{pytrz})$                    | MLCT/LLCT      | 3.40                     | 364.8                          | 0.0864 | 360                           |
| $S_0 \rightarrow S_4$    | H→L+1        | $d(\text{Re})+\pi(\text{CO})/\pi(\text{Cl}) \rightarrow \pi^*(\text{PBO})$                      | MLCT/LLCT      | 3.70                     | 335.2                          | 0.0988 |                               |
| $S_0 \rightarrow S_6$    | H-2→L        | $\pi(\text{PBO}) \rightarrow \pi^*(\text{pytrz})$                                               | ILCT           | 4.00                     | 309.9                          | 0.1966 | 302                           |
| $S_0 \rightarrow S_8$    | H-2→L+1      | $\pi(\text{PBO}) \rightarrow \pi^*(\text{PBO})$                                                 | ILCT           | 4.11                     | 301.4                          | 0.1449 |                               |
| $S_0 \rightarrow S_9$    | H→L+3        | $d(\text{Re})+\pi(\text{CO})/\pi(\text{Cl}) \rightarrow \pi^*(\text{pytrz})$                    | MLCT/LLCT      | 4.16                     | 298.2                          | 0.5334 |                               |
| $S_0 \rightarrow S_{10}$ | H-3→L+1      | $d(\text{Re})+\pi(\text{CO})/\pi(\text{PBO}) \rightarrow \pi^*(\text{PBO})$                     | MLCT/LLCT/ILCT | 4.17                     | 297.5                          | 0.4342 |                               |
|                          | H→L+3        | $d(\text{Re})+\pi(\text{CO})/\pi(\text{Cl}) \rightarrow \pi^*(\text{pytrz})$                    | MLCT/LLCT      |                          |                                |        |                               |
| $S_0 \rightarrow S_{13}$ | H-4→L        | $\pi(\text{pytrz})/\pi(\text{Cl}) \rightarrow \pi^*(\text{pytrz})$                              | LLCT/ILCT      | 4.36                     | 284.1                          | 0.0713 |                               |
| $S_0 \rightarrow S_{19}$ | H-5→L        | $\pi(\text{PBO}) \rightarrow \pi^*(\text{pytrz})$                                               | ILCT           | 4.69                     | 264.3                          | 0.0604 |                               |
| $S_0 \rightarrow S_{29}$ | H-4→L+2      | $\pi(\text{pytrz})/\pi(\text{Cl}) \rightarrow \pi^*(\text{pytrz})$                              | ILCT/LLCT      | 5.12                     | 242.4                          | 0.1542 |                               |
| $S_0 \rightarrow S_{34}$ | H-4→L+3      | $\pi(\text{pytrz})/\pi(\text{Cl}) \rightarrow \pi^*(\text{pytrz})$                              | ILCT/LLCT      | 5.33                     | 232.8                          | 0.0419 | 238                           |
| $S_0 \rightarrow S_{50}$ | H-7→L+2      | $\pi(\text{Cl}) \rightarrow \pi^*(\text{pytrz})$                                                | LLCT           | 5.66                     | 219.2                          | 0.0573 |                               |
| $S_0 \rightarrow S_{60}$ | H-2→L+7      | $\pi(\text{PBO}) \rightarrow \pi^*(\text{PBO})/p(\text{Re})+\pi^*(\text{CO})$                   | ILCT/LLCT      | 5.84                     | 212.2                          | 0.0364 |                               |
| $S_0 \rightarrow S_{72}$ | H-10→L+1     | $\pi(\text{Cl}) \rightarrow \pi^*(\text{PBO})$                                                  | LLCT           | 6.10                     | 203.3                          | 0.0340 |                               |
| $S_0 \rightarrow S_{80}$ | H-3→L+8      | $d(\text{Re})+\pi(\text{CO})/\pi(\text{PBO}) \rightarrow \pi^*(\text{PBO})/\pi^*(\text{pytrz})$ | MLCT/LLCT/ILCT | 6.20                     | 200.1                          | 0.0509 |                               |

MLCT: metal-to-ligand charge transfer; LMCT: ligand-to-metal charge transfer; LLCT: ligand-to-ligand charge transfer; ILCT: intraligand charge transfer. pytrz: pyridyl-triazolylidene; PBO= phenylbenzoxazole.

**Table S25.** The frontier molecular orbital compositions (%) and energy levels for complex **Re-BOP** (in dichloromethane). Selected data published in Wang *et al.*, *Dalton Trans.* 2018, **47**, 8087–8099.

| Orbital                     | Energy (eV) | MO Contribution (%) |    |    |                |                | Main bond type |                                                |
|-----------------------------|-------------|---------------------|----|----|----------------|----------------|----------------|------------------------------------------------|
|                             |             | Re                  | CO | Cl | P <sub>1</sub> | P <sub>2</sub> |                |                                                |
| 126                         | LUMO+5      | -0.74               | 2  | 2  | 0              | 3              | 92             | $\pi^*(\text{PBO})$                            |
| 125                         | LUMO+4      | -0.83               | 35 | 59 | 0              | 5              | 2              | $p(\text{Re}) + \pi^*(\text{CO})$              |
| 124                         | LUMO+3      | -1.35               | 1  | 3  | 0              | 71             | 25             | $\pi^*(\text{pyta}) + \pi^*(\text{PBO})$       |
| 123                         | LUMO+2      | -1.55               | 0  | 1  | 0              | 78             | 21             | $\pi^*(\text{pyta}) + \pi^*(\text{PBO})$       |
| 122                         | LUMO+1      | -2.16               | 1  | 2  | 0              | 25             | 73             | $\pi^*(\text{PBO}) + \pi^*(\text{pyta})$       |
| 121                         | LUMO        | -2.23               | 3  | 4  | 0              | 88             | 5              | $\pi^*(\text{pyta})$                           |
| HOMO–LUMO gap (E = 4.38 eV) |             |                     |    |    |                |                |                |                                                |
| 120                         | HOMO        | -6.61               | 48 | 22 | 18             | 4              | 7              | $d(\text{Re}) + \pi(\text{CO}) + p(\text{Cl})$ |
| 119                         | HOMO–1      | -6.71               | 47 | 20 | 20             | 4              | 8              | $d(\text{Re}) + \pi(\text{CO}) + p(\text{Cl})$ |
| 118                         | HOMO–2      | -6.92               | 9  | 3  | 8              | 5              | 75             | $\pi(\text{PBO})$                              |
| 117                         | HOMO–3      | -7.19               | 69 | 30 | 1              | 0              | 0              | $d(\text{Re}) + \pi(\text{CO})$                |
| 116                         | HOMO–4      | -7.68               | 0  | 0  | 0              | 9              | 90             | $\pi(\text{PBO})$                              |
| 115                         | HOMO–5      | -7.72               | 0  | 0  | 2              | 60             | 38             | $\pi(\text{pyta}) + \pi(\text{PBO})$           |

pyta: pyridyl-triazole; PBO = phenylbenzoxazole.

**Table 26.** The main electronic transitions for complex **Re-BOP**, calculated with TDDFT method at the PBE1PBE/LANL2DZ level (in dichloromethane). From Wang *et al.*, *Dalton Trans.* 2018, **47**, 8087–8099.

| Electronic transition    | Contribution              | Assignment                                                                                        | $E_{\text{calc}}$ /eV | $\lambda_{\text{calc}}$ /nm | $f$   | $\lambda_{\text{exp}}$ /nm |     |
|--------------------------|---------------------------|---------------------------------------------------------------------------------------------------|-----------------------|-----------------------------|-------|----------------------------|-----|
| $S_0 \rightarrow S_2$    | H – 1 $\rightarrow$ LUMO  | $d(\text{Re}) + \pi(\text{CO}) + p(\text{Cl}) \rightarrow \pi^*(\text{pyta})$                     | MLCT/LLCT             | 3.57                        | 347.4 | 0.0801                     |     |
| $S_0 \rightarrow S_3$    | HOMO $\rightarrow$ L + 1  | $d(\text{Re}) + \pi(\text{CO}) + p(\text{Cl}) \rightarrow \pi^*(\text{PBO}) + \pi^*(\text{pyta})$ | MLCT/LLCT             | 3.82                        | 324.4 | 0.5028                     |     |
| $S_0 \rightarrow S_5$    | H – 1 $\rightarrow$ L + 1 | $d(\text{Re}) + \pi(\text{CO}) + p(\text{Cl}) \rightarrow \pi^*(\text{PBO}) + \pi^*(\text{pyta})$ | MLCT/LLCT             | 3.92                        | 316.4 | 0.3102                     |     |
| $S_0 \rightarrow S_6$    | H – 2 $\rightarrow$ L + 1 | $\pi(\text{PBO}) \rightarrow \pi^*(\text{PBO}) + \pi^*(\text{pyta})$                              | ILCT/IL               | 4.08                        | 304.1 | 0.6416                     | 303 |
| $S_0 \rightarrow S_7$    | H – 2 $\rightarrow$ LUMO  | $\pi(\text{PBO}) \rightarrow \pi^*(\text{pyta})$                                                  | ILCT                  | 4.17                        | 297.5 | 0.0478                     |     |
| $S_0 \rightarrow S_7$    | H – 2 $\rightarrow$ L + 1 | $\pi(\text{PBO}) \rightarrow \pi^*(\text{PBO}) + \pi^*(\text{pyta})$                              | ILCT/IL               |                             |       |                            |     |
| $S_0 \rightarrow S_8$    | HOMO $\rightarrow$ L + 2  | $d(\text{Re}) + \pi(\text{CO}) + p(\text{Cl}) \rightarrow \pi^*(\text{pyta}) + \pi^*(\text{PBO})$ | MLCT/LLCT             | 4.27                        | 290.3 | 0.0177                     | 289 |
| $S_0 \rightarrow S_{17}$ | H – 5 $\rightarrow$ LUMO  | $\pi(\text{pyta}) + \pi(\text{PBO}) \rightarrow \pi^*(\text{pyta})$                               | ILCT/IL               | 4.71                        | 263.2 | 0.1093                     |     |
| $S_0 \rightarrow S_{18}$ | H – 5 $\rightarrow$ L + 1 | $\pi(\text{pyta}) + \pi(\text{PBO}) \rightarrow \pi^*(\text{PBO}) + \pi^*(\text{pyta})$           | ILCT/IL               | 4.72                        | 262.5 | 0.0882                     |     |
| $S_0 \rightarrow S_{18}$ | H – 2 $\rightarrow$ L + 2 | $\pi(\text{PBO}) \rightarrow \pi^*(\text{pyta}) + \pi^*(\text{PBO})$                              | ILCT/IL               |                             |       |                            |     |
| $S_0 \rightarrow S_{27}$ | H – 2 $\rightarrow$ L + 3 | $\pi(\text{PBO}) \rightarrow \pi^*(\text{pyta}) + \pi^*(\text{PBO})$                              | ILCT/IL               | 5.05                        | 245.6 | 0.0954                     |     |
| $S_0 \rightarrow S_{28}$ | H – 3 $\rightarrow$ L + 4 | $d(\text{Re}) + \pi(\text{CO}) \rightarrow p(\text{Re}) + \pi^*(\text{CO})$                       | MLCT/ILCT             | 5.12                        | 242.2 | 0.1173                     |     |
| $S_0 \rightarrow S_{34}$ | H – 4 $\rightarrow$ L + 2 | $\pi(\text{PBO}) \rightarrow \pi^*(\text{pyta}) + \pi^*(\text{PBO})$                              | ILCT/IL               | 5.43                        | 228.5 | 0.1500                     | 229 |
| $S_0 \rightarrow S_{34}$ | HOMO $\rightarrow$ L + 5  | $d(\text{Re}) + \pi(\text{CO}) + p(\text{Cl}) \rightarrow \pi^*(\text{PBO})$                      | MLCT/LLCT             |                             |       |                            |     |
| $S_0 \rightarrow S_{36}$ | H – 5 $\rightarrow$ L + 2 | $\pi(\text{pyta}) + \pi(\text{PBO}) \rightarrow \pi^*(\text{pyta}) + \pi^*(\text{PBO})$           | ILCT/IL               | 5.47                        | 226.6 | 0.0761                     |     |

MLCT: metal-to-ligand charge transfer; LMCT: ligand-to-metal charge transfer; LLCT: ligand-to-ligand charge transfer; ILCT: intraligand charge transfer. pyta: pyridyl-triazole; PBO = phenylbenzoxazole.

**Table S27.** Phosphorescence emission energies of **Re-Tol**, **Re-T-Tol** and **Re-T-BOP** calculated with DFT and TDDFT methods at the PBE1PBE/LANL2DZ level, in comparison with the experimental values.  $\Delta E_{T_1-S_0}$  is the energy difference between the ground singlet and triplet states.

| Complex         | DFT                  |       |      |       | Character | Major contribution | Character | TDDFT     |       |      |       |
|-----------------|----------------------|-------|------|-------|-----------|--------------------|-----------|-----------|-------|------|-------|
|                 | $\Delta E_{T_1-S_0}$ |       |      |       |           |                    |           | gas phase |       | DCM  |       |
|                 | gas phase            |       | DCM  |       |           |                    |           | eV        | nm    | eV   | nm    |
| <b>Re-Tol</b>   | 2.05                 | 604.8 | 2.39 | 518.8 | MLCT      | H $\rightarrow$ L  | MLCT/LLCT | 1.77      | 702.4 | 2.26 | 549.5 |
| <b>Re-T-Tol</b> | 1.60                 | 774.9 | 2.05 | 604.8 | MLCT      | H $\rightarrow$ L  | MLCT/LLCT | 1.36      | 914.7 | 1.89 | 655.2 |
| <b>Re-T-BOP</b> | 1.62                 | 765.3 | 2.00 | 619.9 | MLCT      | H $\rightarrow$ L  | MLCT/LLCT | 1.38      | 900.8 | 1.85 | 669.0 |

**Table S28.** Natural populations of the  $5d_{xy}$ ,  $5d_{xz}$ ,  $5d_{yz}$ ,  $5d_{x^2-y^2}$  and  $5d_z^2$  orbitals of the central atom in **Re-Tol**, **Re-T-Tol** and **Re-T-BOP**.

| Orbital        | Complex   |       |           |       |           |       |
|----------------|-----------|-------|-----------|-------|-----------|-------|
|                | Re-Tol    |       | Re-T-Tol  |       | Re-T-BOP  |       |
|                | Gas phase | DCM   | Gas phase | DCM   | Gas phase | DCM   |
| $5d_{xy}$      | 1.208     | 1.478 | 1.289     | 1.108 | 1.346     | 1.134 |
| $5d_{xz}$      | 1.397     | 1.539 | 1.287     | 1.548 | 1.444     | 1.531 |
| $5d_{yz}$      | 1.467     | 1.480 | 1.494     | 1.537 | 1.205     | 1.439 |
| $5d_{x^2-y^2}$ | 1.416     | 1.074 | 1.406     | 1.510 | 1.371     | 1.504 |
| $5d_z^2$       | 1.223     | 1.117 | 1.320     | 1.070 | 1.432     | 1.165 |

The population of  $5d$  orbitals ( $5d_{xy}$ ,  $5d_{xz}$ ,  $5d_{yz}$ ,  $5d_{x^2-y^2}$  and  $5d_z^2$ ) of the central atoms shows that in free Re (+1) state, the population of  $5d_{xy}$ ,  $5d_{xz}$  and  $5d_{yz}$  orbitals are 2.0, 2.0 and 2.0 (e) and the other two ( $5d_{x^2-y^2}$  and  $5d_z^2$ ) orbitals remain vacant. On complex formation, some decrease in populations for the  $5d_{xy}$ ,  $5d_{xz}$  and  $5d_{yz}$  orbital and some increase in the populations of  $5d_{x^2-y^2}$  and  $5d_z^2$  orbital can be observed in comparison to free Re (+1) state.

**Table S29.** Atomic charges from the Natural Population Analysis (NPA) for **Re-Tol**, **Re-BOP**, **Re-T-Tol** and **Re-T-BOP**.

| Atom        | Complex   |       |                     |           |       |           |       |  |
|-------------|-----------|-------|---------------------|-----------|-------|-----------|-------|--|
|             | Re-Tol    |       | Re-BOP <sup>a</sup> | Re-T-Tol  |       | Re-T-BOP  |       |  |
|             | Gas phase | DCM   | DCM                 | Gas phase | DCM   | Gas phase | DCM   |  |
| Re(1)       | -1.03     | -0.99 | -1.00               | -1.21     | -1.17 | -1.22     | -1.17 |  |
| C(1)        | +0.76     | +0.76 | +0.74               | +0.74     | +0.75 | +0.73     | +0.75 |  |
| C(2)        | +0.78     | +0.77 | +0.78               | +0.79     | +0.78 | +0.79     | +0.78 |  |
| C(3)        | +0.73     | +0.75 | +0.76               | +0.76     | +0.76 | +0.76     | +0.76 |  |
| N(1) / C(4) | -0.17     | -0.19 | -0.18               | +0.14     | +0.12 | +0.13     | +0.11 |  |
| N(4)        | -0.38     | -0.40 | -0.40               | -0.36     | -0.38 | -0.36     | -0.38 |  |
| Cl(1)       | -0.40     | -0.46 | -0.46               | -0.40     | -0.47 | -0.39     | -0.47 |  |
| O(1)        | -0.47     | -0.48 | -0.50               | -0.49     | -0.51 | -0.50     | -0.51 |  |
| O(2)        | -0.46     | -0.48 | -0.48               | -0.47     | -0.50 | -0.47     | -0.50 |  |
| O(3)        | -0.48     | -0.50 | -0.48               | -0.47     | -0.48 | -0.47     | -0.48 |  |

<sup>a</sup> From Wang *et al.*, *Dalton Trans.* 2018, **47**, 8087–8099.

**Table S30.** Absolute electronegativity ( $\chi$ ), absolute hardness ( $\eta$ ), electrophilicity index ( $\omega$ ), absolute softness ( $\sigma$ ) and dipole moment ( $\mu$ ) of complexes **Re-Tol**, **Re-BOP**, **Re-T-Tol** and **Re-T-BOP**.

| Parameters <sup>a</sup>       | Complex    |            |                     |            |            |            |            |            |
|-------------------------------|------------|------------|---------------------|------------|------------|------------|------------|------------|
|                               | Re-Tol     |            | Re-BOP <sup>b</sup> |            | Re-T-Tol   |            | Re-T-BOP   |            |
|                               | gas phase  | DCM        | gas phase           | DCM        | gas phase  | DCM        | gas phase  | DCM        |
| Total Energy (Hartree)        | -1192.5966 | -1192.6241 | -1551.4356          | -1551.4654 | -1231.8280 | -1231.8577 | -1590.6660 | -1590.6993 |
| $E_{\text{HOMO}}$ (eV)        | -6.05      | -6.64      | -6.02               | -6.61      | -5.87      | -6.41      | -5.86      | -6.42      |
| $E_{\text{LUMO}}$ (eV)        | -2.36      | -2.21      | -2.44               | -2.23      | -2.50      | -2.21      | -2.51      | -2.31      |
| Energy gap $\Delta E$ (eV)    | 3.69       | 4.43       | 3.58                | 4.38       | 3.37       | 4.12       | 3.35       | 4.11       |
| Ionization Potential $I$      | 6.05       | 6.64       | 6.02                | 6.61       | 5.87       | 6.41       | 5.86       | 6.42       |
| Electron Affinity $A$         | 2.36       | 2.21       | 2.21                | 2.23       | 2.50       | 2.21       | 2.51       | 2.31       |
| Electronegativity $\chi$ (eV) | 4.21       | 4.43       | 4.23                | 4.42       | 4.19       | 4.31       | 4.19       | 4.37       |
| Hardness $\eta$ (eV)          | 1.85       | 2.22       | 1.79                | 2.19       | 1.69       | 2.10       | 1.68       | 2.10       |
| Electrophilicity $\omega$     | 4.78       | 4.42       | 5.00                | 4.46       | 5.20       | 4.42       | 5.23       | 4.55       |
| Softness $\sigma$ (eV)        | 0.27       | 0.23       | 0.56                | 0.46       | 0.30       | 0.24       | 0.30       | 0.24       |
| Dipole moment $\mu$ (D)       | 12.36      | 17.36      | 11.73               | 15.25      | 11.84      | 16.17      | 11.59      | 16.08      |

<sup>a</sup> The frontier molecular orbital descriptors such as ionization potential ( $IP = -E_{\text{HOMO}}$ ), electron affinity ( $EA = -E_{\text{LUMO}}$ ), hardness ( $\eta = (I - A)/2$ ), electronegativity ( $\chi = (I + A)/2$ ), chemical potential ( $\mu = -\chi$ ), softness ( $\sigma = 1/\eta$ ), electrophilicity index ( $\omega = \mu^2/2\eta$ ) calculated according to Koopmans theorem [T. Koopmans, *Physica*, 1933, **1**, 104–113], and dipole moment calculated using the equation:  $\mu = 2.54 \times (x^2 + y^2 + z^2)^{1/2}$ .

<sup>b</sup> From Wang *et al.*, *Dalton Trans.* 2018, **47**, 8087–8099.

| Occupied orbitals                |                                                                                     | Unoccupied orbitals               |                                                                                       |
|----------------------------------|-------------------------------------------------------------------------------------|-----------------------------------|---------------------------------------------------------------------------------------|
| <b>HOMO / 94</b><br>(-6.05 eV)   | 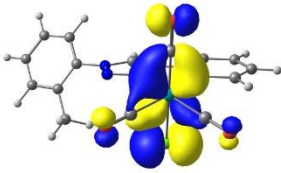   | <b>LUMO / 95</b><br>(-2.36 eV)    |    |
| <b>HOMO-1 / 93</b><br>(-6.16 eV) |    | <b>LUMO+1 / 96</b><br>(-1.86 eV)  |    |
| <b>HOMO-2 / 92</b><br>(-6.73 eV) |    | <b>LUMO+2 / 97</b><br>(-1.60 eV)  |    |
| <b>HOMO-3 / 91</b><br>(-7.43 eV) |   | <b>LUMO+3 / 98</b><br>(-1.05 eV)  |   |
| <b>HOMO-4 / 90</b><br>(-7.51 eV) |  | <b>LUMO+4 / 99</b><br>(-0.80 eV)  |  |
| <b>HOMO-5 / 89</b><br>(-7.85 eV) |  | <b>LUMO+5 / 100</b><br>(-0.49 eV) |  |

**Figure S32.** The isodensity plots of the frontier molecular orbitals of **Re-Tol** (in gas phase).

| Occupied orbitals                |                                                                                     | Unoccupied orbitals               |                                                                                       |
|----------------------------------|-------------------------------------------------------------------------------------|-----------------------------------|---------------------------------------------------------------------------------------|
| <b>HOMO / 94</b><br>(-6.64 eV)   | 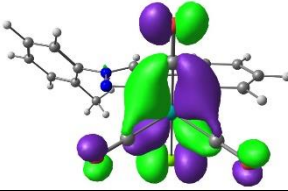   | <b>LUMO / 95</b><br>(-2.21 eV)    |    |
| <b>HOMO-1 / 93</b><br>(-6.74 eV) |    | <b>LUMO+1 / 96</b><br>(-1.60 eV)  |    |
| <b>HOMO-2 / 92</b><br>(-7.19 eV) |    | <b>LUMO+2 / 97</b><br>(-1.37 eV)  |    |
| <b>HOMO-3 / 91</b><br>(-7.56 eV) |   | <b>LUMO+3 / 98</b><br>(-0.84 eV)  |   |
| <b>HOMO-4 / 90</b><br>(-7.69 eV) |  | <b>LUMO+4 / 99</b><br>(-0.75 eV)  |  |
| <b>HOMO-5 / 89</b><br>(-7.90 eV) |  | <b>LUMO+5 / 100</b><br>(-0.68 eV) |  |

**Figure S33.** The isodensity plots of the frontier molecular orbitals of **Re-Tol** (in dichloromethane).



| Occupied orbitals                |                                                                                     | Unoccupied orbitals               |                                                                                       |
|----------------------------------|-------------------------------------------------------------------------------------|-----------------------------------|---------------------------------------------------------------------------------------|
| <b>HOMO / 98</b><br>(-5.87 eV)   | 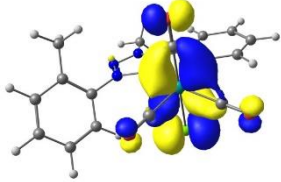   | <b>LUMO / 99</b><br>(-2.50 eV)    |    |
| <b>HOMO-1 / 97</b><br>(-5.99 eV) |    | <b>LUMO+1 / 100</b><br>(-1.84 eV) |    |
| <b>HOMO-2 / 96</b><br>(-6.45 eV) |    | <b>LUMO+2 / 101</b><br>(-1.27 eV) |    |
| <b>HOMO-3 / 95</b><br>(-7.07 eV) |   | <b>LUMO+3 / 102</b><br>(-0.63 eV) |   |
| <b>HOMO-4 / 94</b><br>(-7.36 eV) |  | <b>LUMO+4 / 103</b><br>(-0.56 eV) |  |
| <b>HOMO-5 / 93</b><br>(-7.42 eV) |  | <b>LUMO+5 / 104</b><br>(-0.48 eV) |  |

**Figure S34.** The isodensity plots of the frontier molecular orbitals of **Re-T-Tol** (in gas phase).

| Occupied orbitals                |                                                                                     | Unoccupied orbitals               |                                                                                      |
|----------------------------------|-------------------------------------------------------------------------------------|-----------------------------------|--------------------------------------------------------------------------------------|
| <b>HOMO / 98</b><br>(-6.41 eV)   | 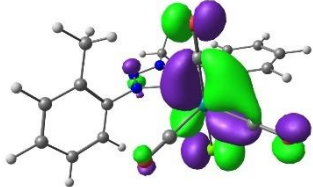   | <b>LUMO / 99</b><br>(-2.29 eV)    |    |
| <b>HOMO-1 / 97</b><br>(-6.56 eV) |    | <b>LUMO+1 / 100</b><br>(-1.63 eV) |    |
| <b>HOMO-2 / 96</b><br>(-6.91 eV) |    | <b>LUMO+2 / 101</b><br>(-1.16 eV) |    |
| <b>HOMO-3 / 95</b><br>(-7.45 eV) |   | <b>LUMO+3 / 102</b><br>(-0.82 eV) |   |
| <b>HOMO-4 / 94</b><br>(-7.47 eV) |  | <b>LUMO+4 / 103</b><br>(-0.68 eV) |  |
| <b>HOMO-5 / 93</b><br>(-7.79 eV) |  | <b>LUMO+5 / 104</b><br>(-0.54 eV) |  |

**Figure S35.** The isodensity plots of the frontier molecular orbitals of **Re-T-Tol** (in dichloromethane).

| Occupied orbitals                 |                                                                                     | Unoccupied orbitals               |                                                                                       |
|-----------------------------------|-------------------------------------------------------------------------------------|-----------------------------------|---------------------------------------------------------------------------------------|
| <b>HOMO / 124</b><br>(-5.86 eV)   | 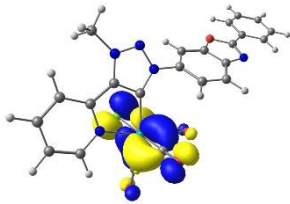   | <b>LUMO / 125</b><br>(-2.51 eV)   |    |
| <b>HOMO-1 / 123</b><br>(-6.00 eV) |    | <b>LUMO+1 / 126</b><br>(-2.01 eV) |    |
| <b>HOMO-2 / 122</b><br>(-6.47 eV) |    | <b>LUMO+2 / 127</b><br>(-1.76 eV) |    |
| <b>HOMO-3 / 121</b><br>(-6.77 eV) |   | <b>LUMO+3 / 128</b><br>(-1.24 eV) |   |
| <b>HOMO-4 / 120</b><br>(-7.05 eV) |  | <b>LUMO+4 / 129</b><br>(-0.64 eV) |  |
| <b>HOMO-5 / 119</b><br>(-7.33 eV) |  | <b>LUMO+5 / 130</b><br>(-0.59 eV) |  |

**Figure S36.** The isodensity plots of the frontier molecular orbitals of **Re-T-BOP** (in gas phase).

| Occupied orbitals                 |                                                                                     | Unoccupied orbitals               |                                                                                       |
|-----------------------------------|-------------------------------------------------------------------------------------|-----------------------------------|---------------------------------------------------------------------------------------|
| <b>HOMO / 124</b><br>(-6.42 eV)   | 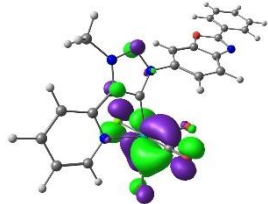   | <b>LUMO / 125</b><br>(-2.31 eV)   |    |
| <b>HOMO-1 / 123</b><br>(-6.58 eV) |    | <b>LUMO+1 / 126</b><br>(-2.03 eV) |    |
| <b>HOMO-2 / 122</b><br>(-6.86 eV) |    | <b>LUMO+2 / 127</b><br>(-1.63 eV) |    |
| <b>HOMO-3 / 121</b><br>(-6.94 eV) |   | <b>LUMO+3 / 128</b><br>(-1.22 eV) |   |
| <b>HOMO-4 / 120</b><br>(-7.46 eV) |  | <b>LUMO+4 / 129</b><br>(-0.74 eV) |  |
| <b>HOMO-5 / 119</b><br>(-7.64 eV) |  | <b>LUMO+5 / 130</b><br>(-0.63 eV) |  |

**Figure S37.** The isodensity plots of the frontier molecular orbitals of **Re-T-BOP** (in dichloromethane).

| Occupied orbitals           |                                                                                     | Unoccupied orbitals         |                                                                                      |
|-----------------------------|-------------------------------------------------------------------------------------|-----------------------------|--------------------------------------------------------------------------------------|
| <b>HOMO</b><br>(-6.61 eV)   | 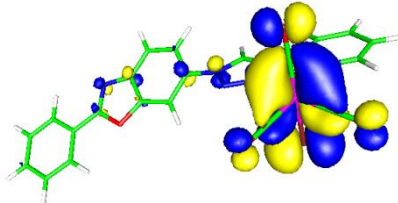   | <b>LUMO</b><br>(-2.23 eV)   |    |
| <b>HOMO-1</b><br>(-6.71 eV) |    | <b>LUMO+1</b><br>(-2.16 eV) |    |
| <b>HOMO-2</b><br>(-6.92 eV) |    | <b>LUMO+2</b><br>(-1.55 eV) |    |
| <b>HOMO-3</b><br>(-7.19 eV) |   | <b>LUMO+3</b><br>(-1.35 eV) |   |
| <b>HOMO-4</b><br>(-7.68 eV) |  | <b>LUMO+4</b><br>(-0.83 eV) |  |
| <b>HOMO-5</b><br>(-7.72 eV) |  | <b>LUMO+5</b><br>(-0.74 eV) |  |

**Figure S38.** The isodensity plots of the frontier molecular orbitals of complex **Re-BOP** (in dichloromethane).

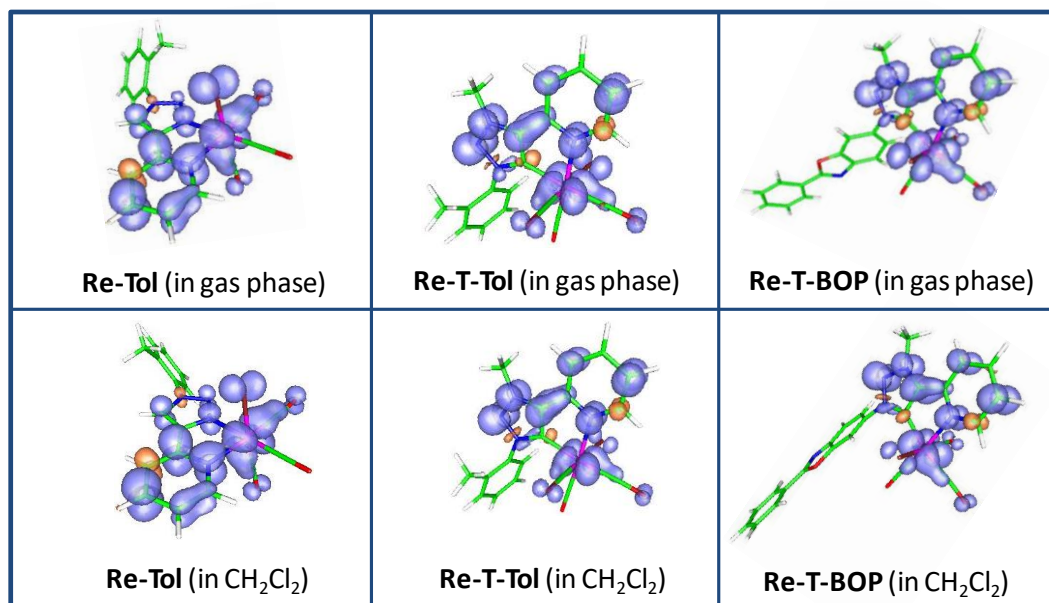

**Figure S39.** Spin density distribution for the lowest triplet state  $T_1$  of **Re-Tol**, **Re-T-Tol** and **Re-T-BOP** in gas phase and in dichloromethane, calculated based on the optimized triplet state with DFT method at the PBE1PBE/LanL2DZ level.

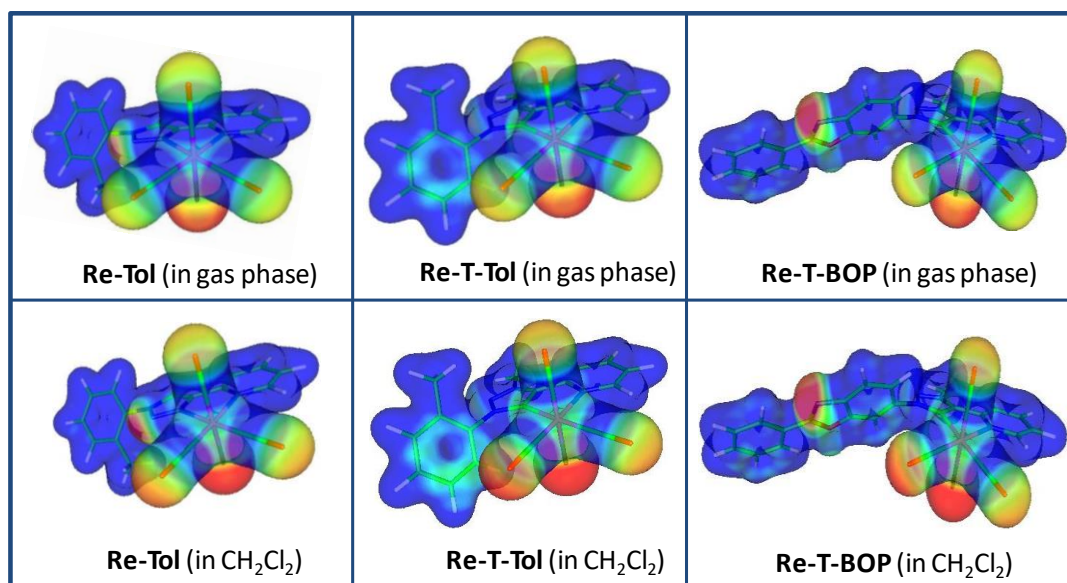

**Figure S40.** Molecular Electrostatic Potential (MEP) of **Re-Tol**, **Re-T-Tol** and **Re-T-BOP** on the  $\rho(r) = 0.02$  au isodensity surface, calculated based on the optimized ground state geometry with DFT method at the PBE1PBE/LanL2DZ level. Mapping colours range from red  $-0.05$  au to blue  $+0.05$  au.

MEP surface plot helps to understand visually the relative polarity of the molecule, as shown in Figure 9. It is also useful to explain quantitatively hydrogen bonding, reactivity and structure–activity relationship of molecules including the biomolecules and drugs. MEP helps to find the sites for electrophilic and nucleophilic attacks as well as hydrogen bonding interactions. The MEP surfaces of **Re-Tol**, **Re-T-Tol** and **Re-T-BOP** studied by PBE1PBE/LanL2DZ were generated by mapping electrostatic potential onto the molecular electron density surface. In the MEP surface map, regions are represented by different colors which corresponds to different values of the electrostatic potential. The maximum negative region which preferred site for electrophilic attack is indicated as red color, whereas the maximum positive region which preferred site for nucleophilic attack is indicated as blue color. Potential increases in the order red  $<$  orange  $<$  yellow  $<$  green  $<$  cyan  $<$  blue, where red shows the strongest repulsion and blue shows the strongest attraction. Regions having the negative potential are over the electronegative atoms while the regions having the positive potential are over the electropositive atoms.

Negative electrostatic potential regions (red colour) of complexes **Re-Tol**, **Re-T-Tol** and **Re-T-BOP** are mainly localized around the chlorine Cl, the nitrogens N of the ligand as well as carbonyl oxygens. The positive electrostatic potential regions (blue colour) are around the hydrogen atoms.

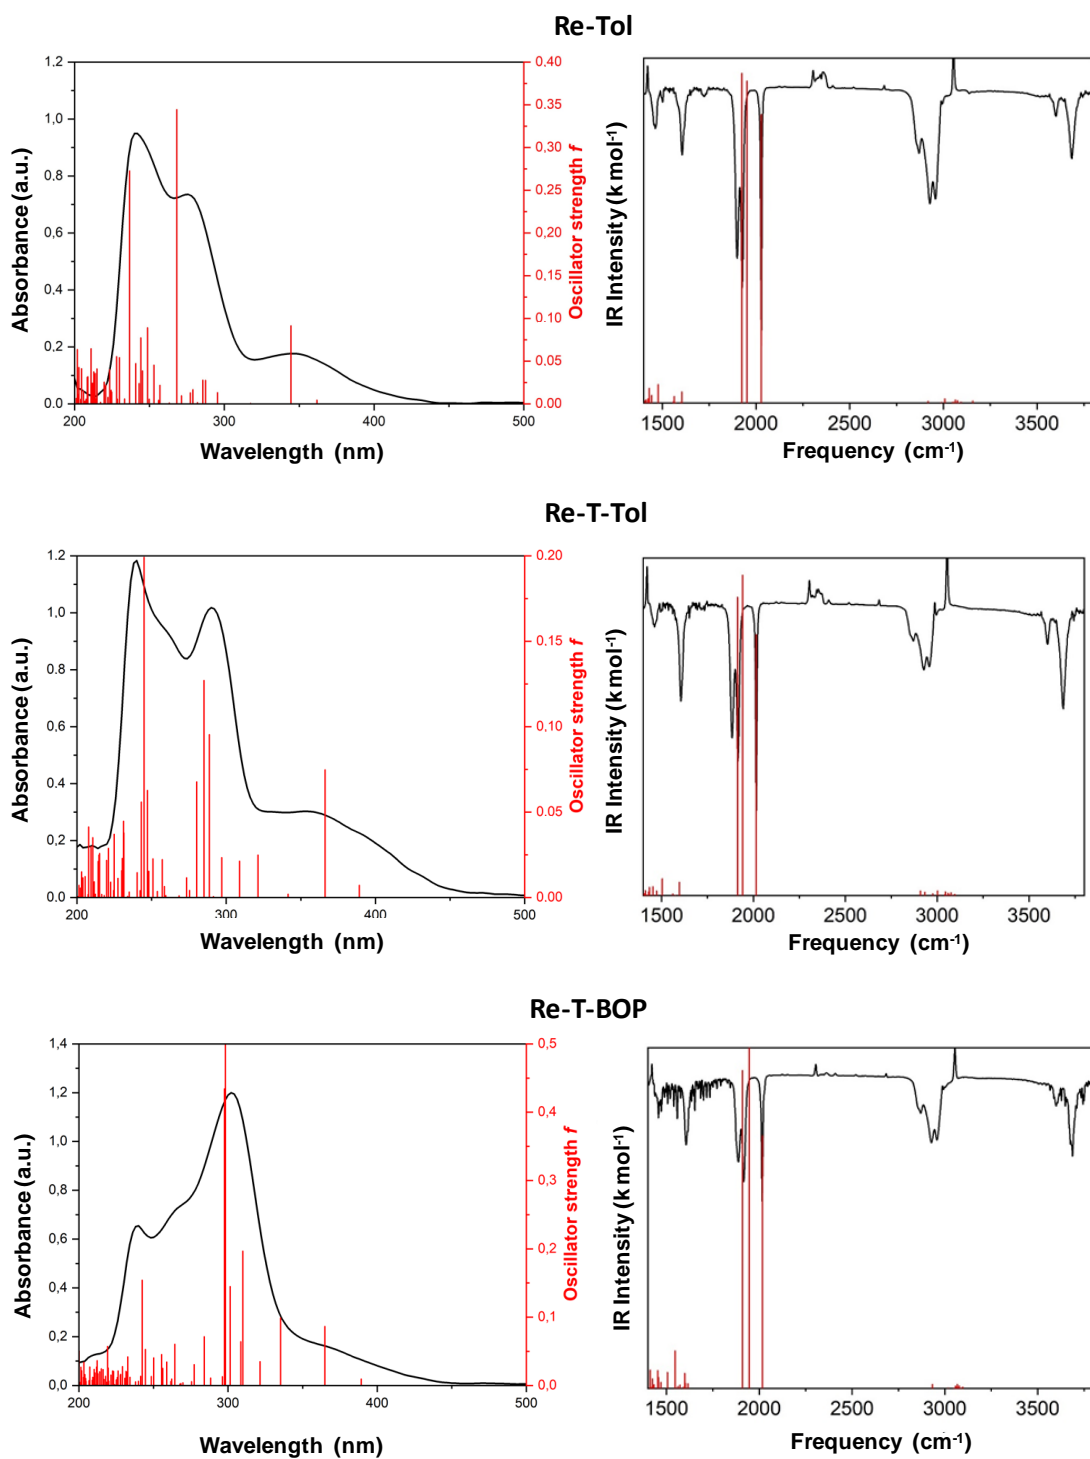

**Figure S41.** Left: The experimental (black) and simulated (red) UV-vis absorption spectra of **Re-Tol**, **Re-T-Tol**, and **Re-T-BOP** (from top to bottom) in DCM. Right: The experimental (black) FT-IR spectra recorded on powders (ATR) and simulated (red) FT-IR spectra of these complexes in gas phase.

## Electrochemistry

**Table S31.** Experimental electrochemical data used, and calculated values of the energy gaps ( $E_g$ ) for the indicated compounds

| Compound | $E_{\text{onset ox}}$<br>(V) | $E_{\text{onset red}}$<br>(V) | $E_{\text{HOMO}}$<br>(eV) | $E_{\text{LUMO}}$<br>(eV) | $E_g^{\text{el}}$<br>(eV) | $E_{\text{calc}}^*$<br>(eV) |
|----------|------------------------------|-------------------------------|---------------------------|---------------------------|---------------------------|-----------------------------|
| Re-Tol   | 1.41                         | -1.54                         | -6.15                     | -3.20                     | 2.95                      | 3.03                        |
| Re-BOP   | 1.40                         | -1.45                         | -6.14                     | -3.29                     | 2.85                      | 3.01 <sup>a</sup>           |
| Re-T-Tol | 1.22                         | -1.48                         | -5.96                     | -3.26                     | 2.70                      | 2.76                        |
| Re-T-BOP | 1.22                         | -1.43                         | -5.96                     | -3.31                     | 2.65                      | 2.78                        |

<sup>a</sup> From Wang *et al.*, *Dalton Trans.* 2018, **47**, 8087–8099.

\*Values obtained from theoretical study.

$E_g^{\text{el}}$  = electrochemical energy gap;  $E_{\text{calc}}^*$  = calculated energy gap at the geometrically-optimized first excited singlet state  $S_1$ .

### Evaluation of the energy gap values ( $E_g^{\text{el}}$ ) for the Re complexes.

The onset oxidation and reduction potentials ( $E_{\text{onset ox}}$ ,  $E_{\text{onset red}}$ ) were measured by cyclic voltammetry in volt *versus* SCE. The CVs were carried out at a potential scan rate of 200 mV s<sup>-1</sup> at room temperature.

The HOMO and LUMO energy levels ( $E_{\text{HOMO}}$  and  $E_{\text{LUMO}}$ ) in electron volt (eV) were calculated according to the empirical equations (1) and (2):<sup>[1]</sup>

$$E_{\text{HOMO}} (\text{eV}) = -e (E_{\text{onset ox}} (\text{V vs. SCE}) + 4.74 \text{ V}) \quad \text{Eq(1)}$$

$$E_{\text{LUMO}} (\text{eV}) = -e (E_{\text{onset red}} (\text{V vs. SCE}) + 4.74 \text{ V}) \quad \text{Eq(2)},$$

and the energy gap value was obtained as follows:  $E_g^{\text{el}} = (E_{\text{LUMO}} - E_{\text{HOMO}})$

The differences observed for the estimation of the energy gaps using experimental methods or theoretical calculations are well known. See for example: R. Stowasser, R. Hoffmann, *J. Am. Chem. Soc.* **1999**, *121*, 3414-3420.

[1] a) Y. Zhou, J. W. Kim, R. Nandhakumar, M. J. Kim, E. Cho, Y. S. Kim, Y. H. Jang, C. Lee, S. Han, K. M. Kim, J.-J. Kim and J. Yoon, *Chem. Commun.* **2010**, *46*, 6512-6514 and references therein;

b) G. V. Loukova, *Chem. Phys. Lett.* **2002**, *353*, 244–252.



### Electrochemical selected curves

**OSWV study** was performed on a Pt working electrode in  $\text{CH}_2\text{Cl}_2 + 0.1 \text{ M } [n\text{Bu}_4\text{N}][\text{BF}_4]$  at room temperature in the presence of ferrocene used as internal reference. Frequency 20 Hz, amplitude 20 mV, step potential 5 mV. Cyclic voltammograms of the indicated compounds were performed on a Pt working electrode in  $\text{CH}_2\text{Cl}_2 + 0.1 \text{ M } [n\text{Bu}_4\text{N}][\text{BF}_4]$  at room temperature at a scan rate of  $0.2 \text{ V s}^{-1}$  or at other mentioned scan rates.

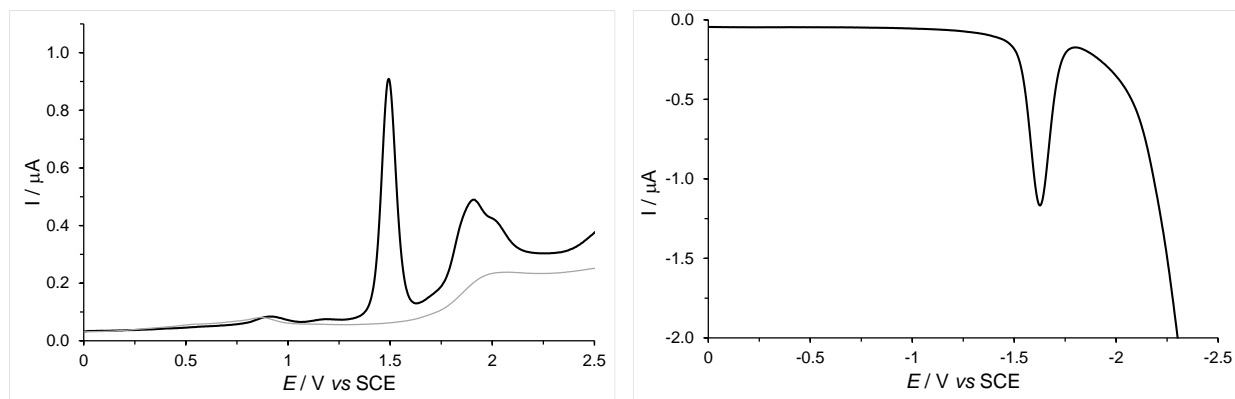

**Figure S42.** OSWVs: anodic (left) and cathodic (right) scans of complex **Re-Tol**.

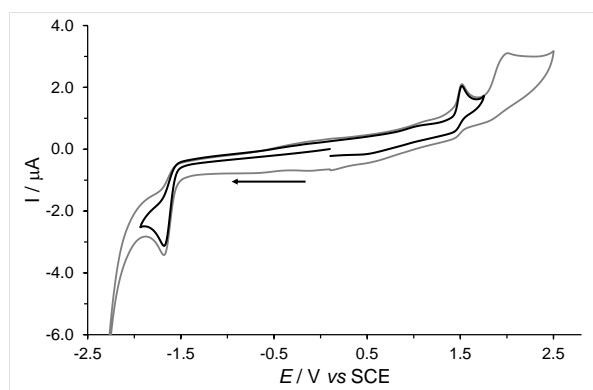

**Figure S43.** Cyclic voltammograms of complex **Re-Tol** (gray), and of its first oxidation and reduction processes (black) at  $0.2 \text{ V/s}$ .

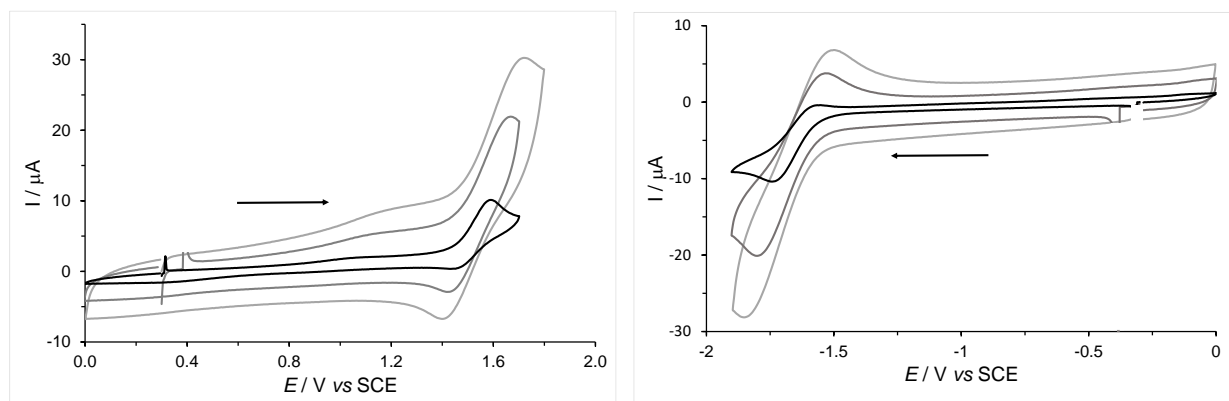

**Figure S44.** Cyclic voltammograms of the first oxidation process of complex **Re-Tol** at 10, 50, and  $100 \text{ V/s}$  from bottom-black line to top-light gray line (left), and of its first reduction process at 10, 50, and  $100 \text{ V/s}$  from bottom-black line to top-gray line (right).

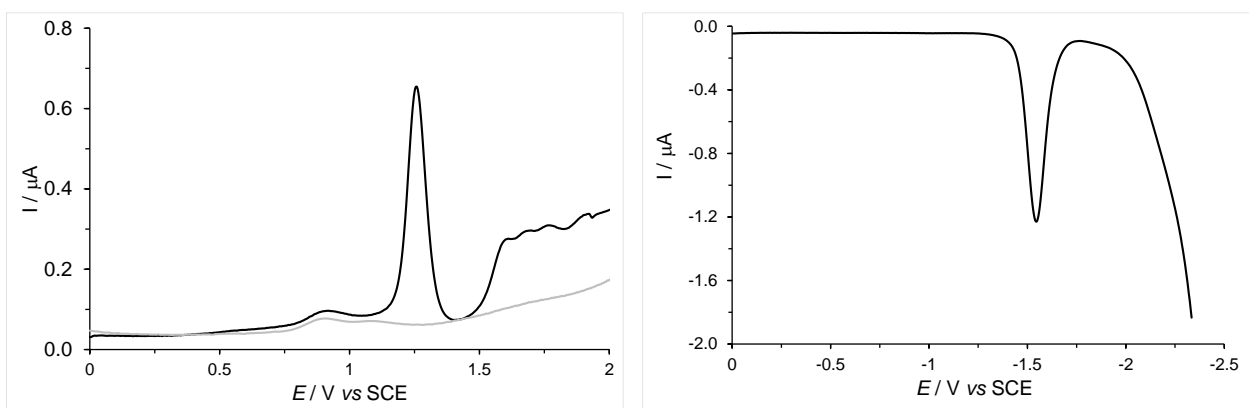

**Figure S45.** OSWVs: anodic (left) and cathodic (right) scans of complex **Re-T-Tol**.

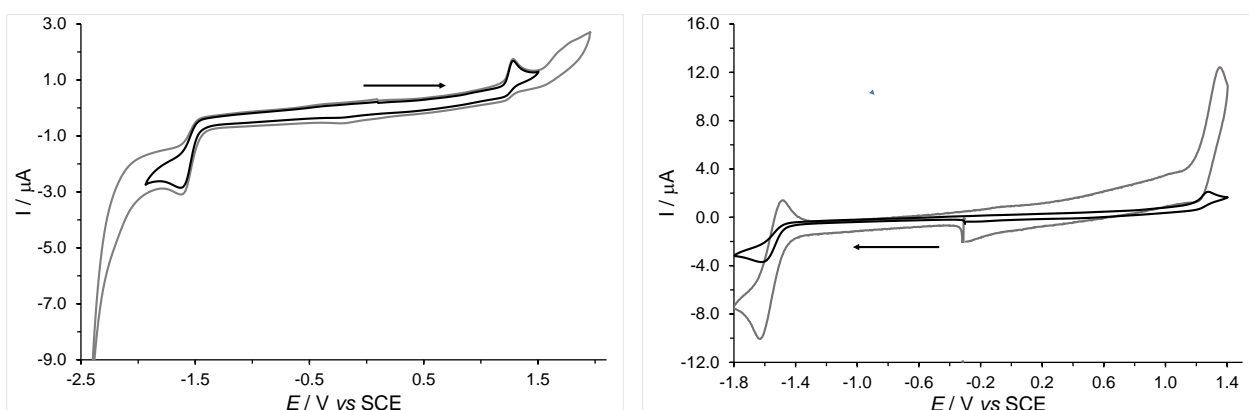

**Figure S46.** Cyclic voltammograms of complex **Re-T-Tol** (gray), and of its first oxidation and reduction processes (black) at 0.2 V/s (left); and cyclic voltammograms of its first oxidation process and reduction process at 0.2 (black) and 10 V/s (gray), right.

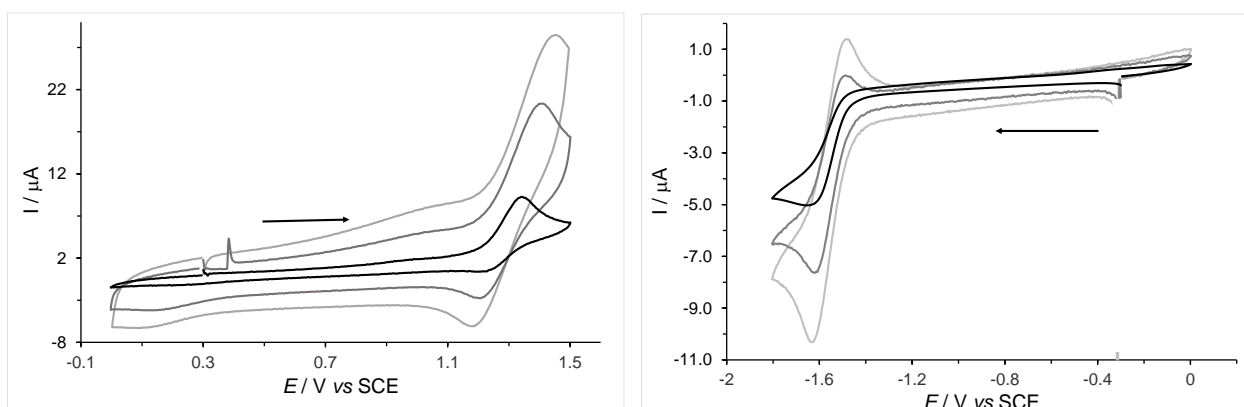

**Figure S47.** Cyclic voltammograms of the first oxidation process of complex **Re-T-Tol** at 10, 50, and 100 V/s from bottom-black line to top-light gray line (left), and of its first reduction process at 1, 5, and 10 V/s from bottom-black line to top-gray line (right).

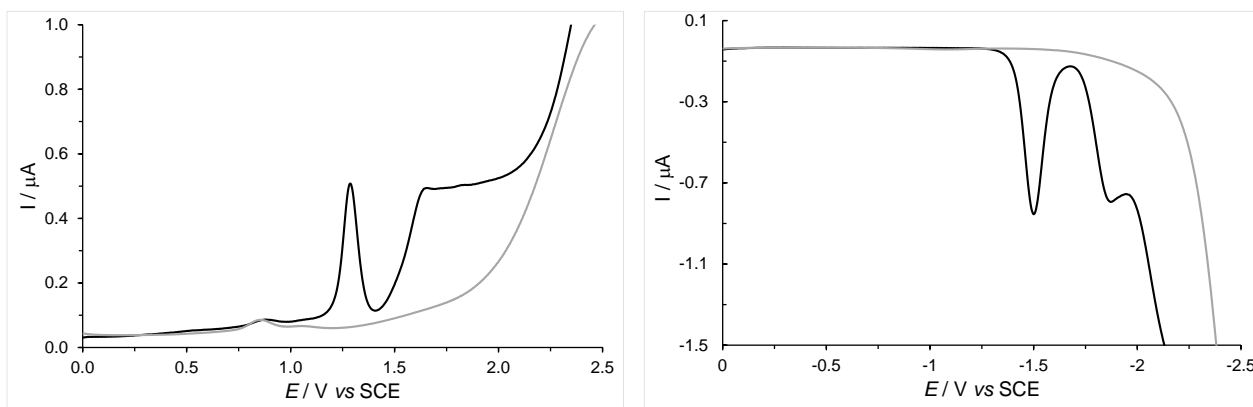

**Figure S48.** OSWVs: anodic (left) and cathodic (right) scans of complex **Re-T-BOP**.

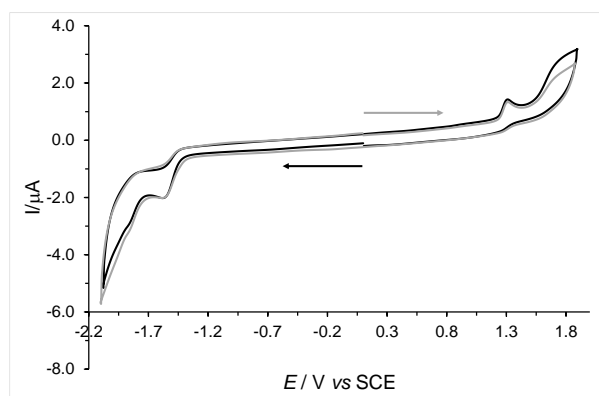

**Figure S49.** Cyclic voltammograms of complex **Re-T-BOP**.

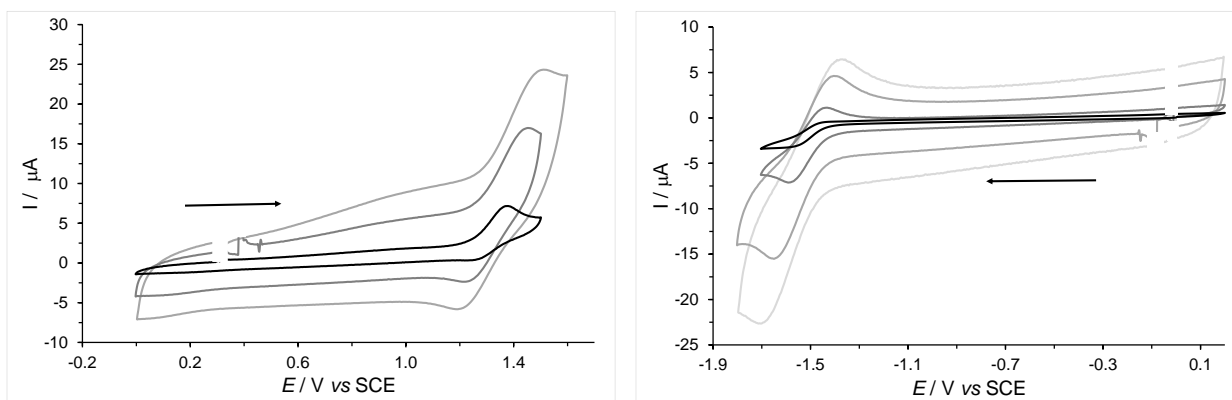

**Figure S50.** Cyclic voltammograms of the first oxidation process of complex **Re-T-BOP** at 10, 50, and 100 V/s from bottom-black line to top-light gray line (left), and of its first reduction process at 1, 10, 50, and 100 V/s from bottom-black line to top-gray line (right).

# Spectroscopy

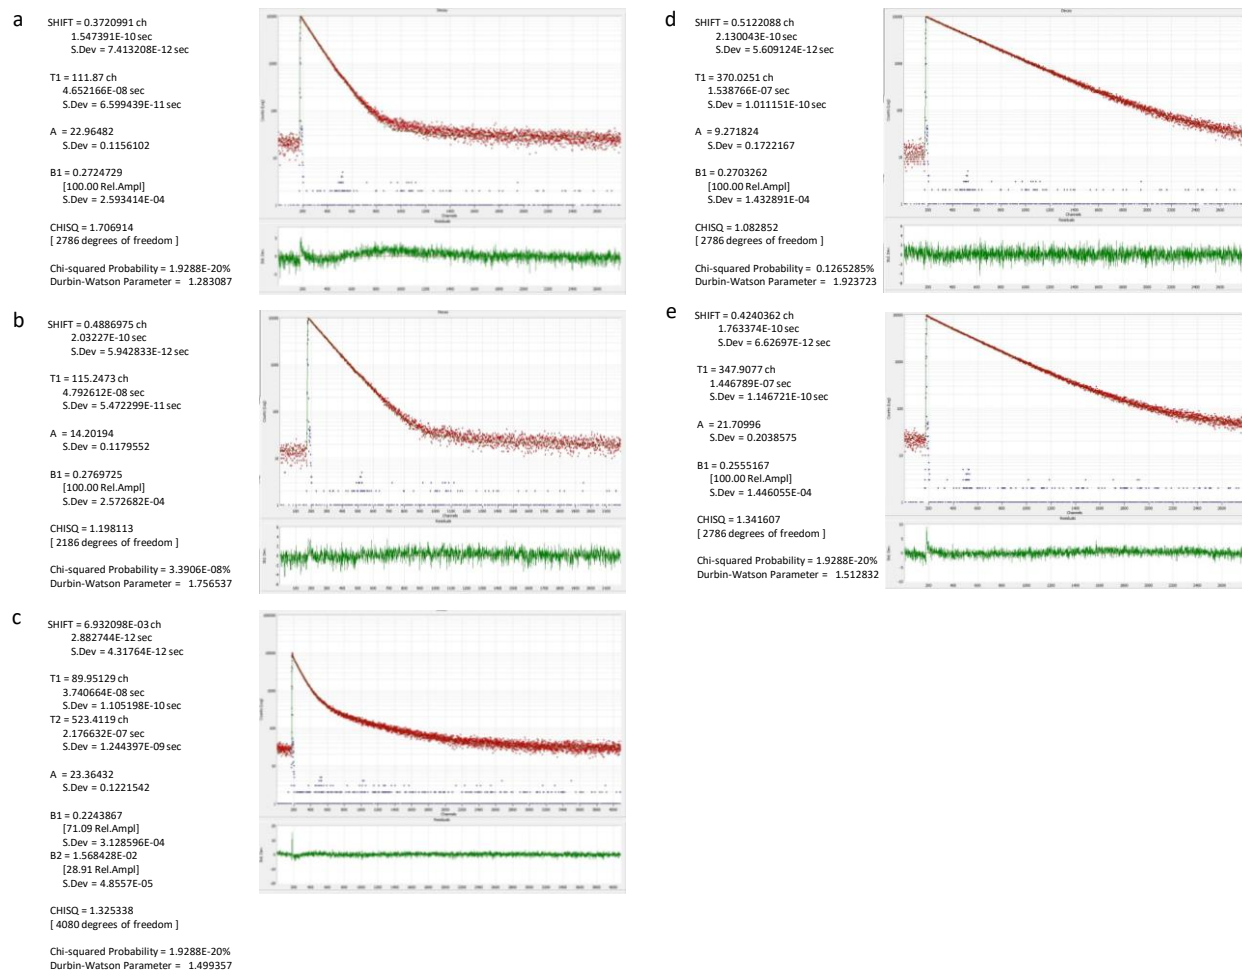

**Figure S51.** Emission decays of **Re-T-Phe** (a), **Re-T-Tol** (b), **Re-T-BOP** (c), **Re-Phe** (d), and **Re-Tol** (e) at  $\sim 1.2 \times 10^{-5}$  M in dichloromethane solutions.

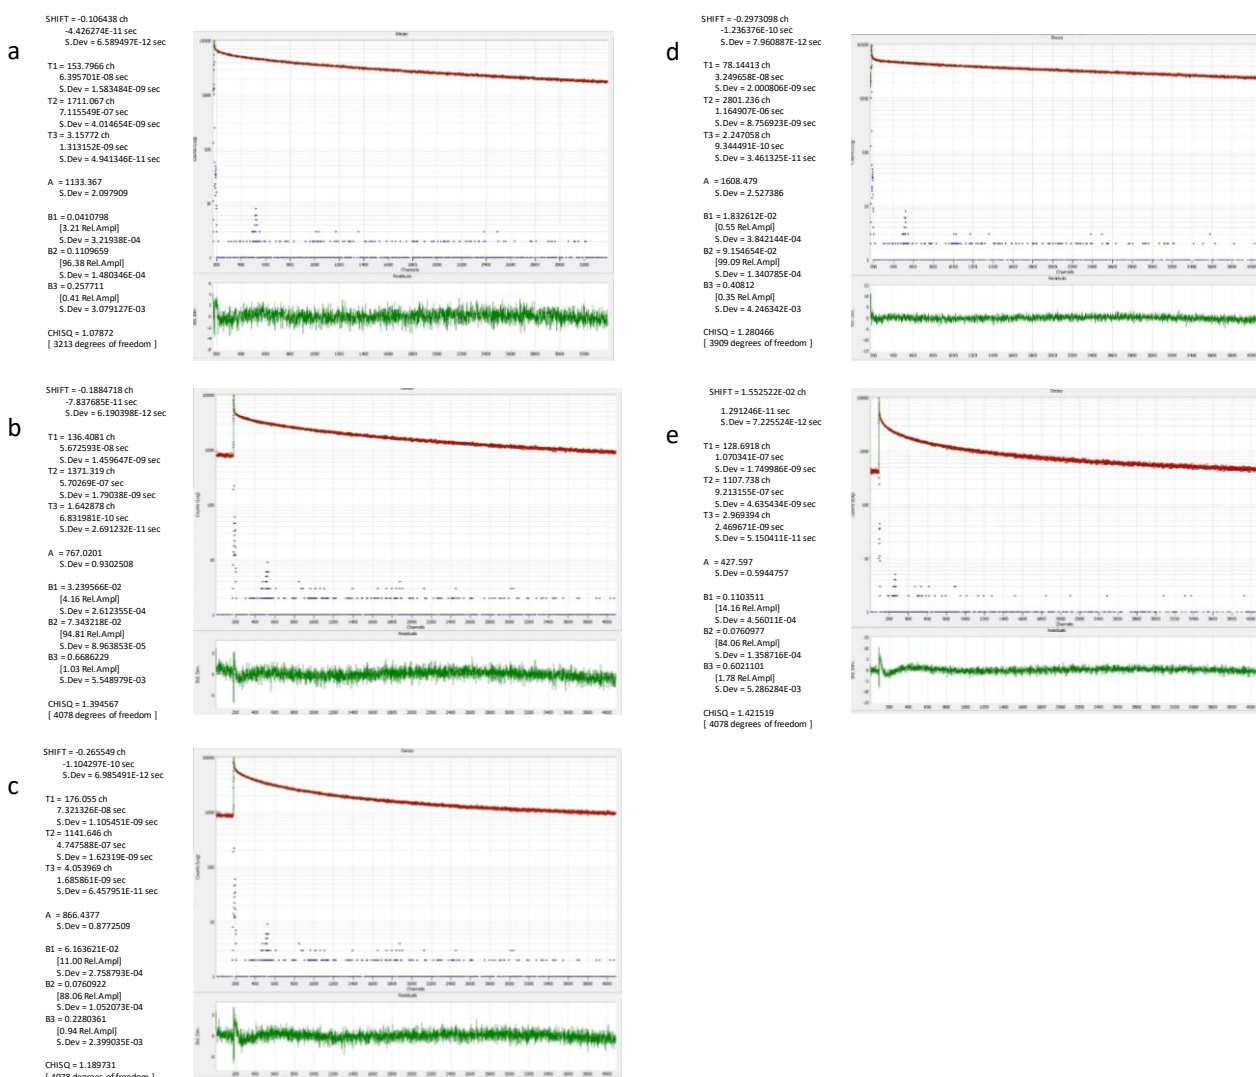

**Figure S52.** Photoluminescence decays of **Re-T-Phe** (a), **Re-T-Tol** (b), **Re-T-BOP** (c), **Re-Phe** (d), and **Re-Tol** (e) in the solid state (pristine microcrystalline powders, except for **Re-Tol** (ground powder)).

**Table S32.** Minimum inhibitory concentration (MIC) of the complexes towards antibiotic-susceptible (S) and multidrug-resistant (R) bacteria, with irradiation by UV light. Comparison with conventional antibiotics.

| Compound                  | MIC ( $\mu$ M) Irradiated samples |       |                      |          |                |         |                     |          |
|---------------------------|-----------------------------------|-------|----------------------|----------|----------------|---------|---------------------|----------|
|                           | <i>S. aureus</i>                  |       | <i>P. aeruginosa</i> |          | <i>E. coli</i> |         | <i>A. baumannii</i> |          |
|                           | (S)                               | (R)   | (S)                  | (R)      | (S)            | (R)     | (S)                 | (R)      |
|                           | ATCC                              | ATCC  | ATCC                 | ATCC     | ATCC           | ATCC    | ATCC                | ATCC     |
|                           | 35923                             | 43300 | 27853                | BAA-2108 | 25922          | BAA-196 | 19606               | BAA-1797 |
| <b>Re-T-Phe</b>           | 32                                | 32    | >128                 | >128     | >128           | >128    | >128                | >128     |
| <b>Re-T-Tol</b>           | 64                                | >128  | >128                 | >128     | >128           | >128    | >128                | >128     |
| <b>Re-T-BOP</b>           | 4                                 | 4     | >128                 | >128     | >128           | >128    | >128                | >128     |
| <b>Re-Phe</b>             | >128                              | >128  | >128                 | >128     | >128           | >128    | >128                | >128     |
| <b>Re-Tol</b>             | 32                                | 32    | >128                 | >128     | >128           | >128    | >128                | >128     |
| <b>Re-BOP</b>             | 8                                 | >128  | >128                 | >128     | >128           | >128    | >128                | >128     |
| <b>Re-[1,2,4]-Phe</b>     | >128                              | >128  | >128                 | >128     | >128           | >128    | >128                | >128     |
| <b>Re-[1,2,4]-BOP</b>     | >128                              | >128  | >128                 | >128     | >128           | >128    | >128                | >128     |
| <b>Gentamicin sulfate</b> | 1                                 | 128   | 0.5                  | 8        | 0.125          | >128    | 0.5                 | >128     |
| <b>Ampicillin</b>         | 0.25                              | 32    | >128                 | >128     | 16             | >128    | >128                | >128     |

**Table S33.** Cartesian coordinates of **Re-Tol** in  $S_0$  (in gas phase).

|    |              |              |              |
|----|--------------|--------------|--------------|
| 6  | 12.895328000 | 11.568135000 | 10.472812000 |
| 6  | 11.343046000 | 12.790025000 | 8.625608000  |
| 6  | 13.871585000 | 12.023899000 | 7.971038000  |
| 6  | 11.295760000 | 8.662028000  | 5.442009000  |
| 1  | 11.198344000 | 7.732482000  | 4.903664000  |
| 6  | 11.976854000 | 9.029869000  | 6.579022000  |
| 6  | 12.848847000 | 8.359783000  | 7.527251000  |
| 6  | 13.276388000 | 7.041120000  | 7.390141000  |
| 1  | 12.954696000 | 6.453376000  | 6.536723000  |
| 6  | 14.108573000 | 6.499037000  | 8.359788000  |
| 1  | 14.451593000 | 5.472277000  | 8.277871000  |
| 6  | 14.491150000 | 7.294359000  | 9.436315000  |
| 1  | 15.136308000 | 6.914869000  | 10.220960000 |
| 6  | 14.026907000 | 8.600872000  | 9.503128000  |
| 1  | 14.295358000 | 9.251596000  | 10.327685000 |
| 6  | 9.745299000  | 9.942339000  | 3.962451000  |
| 6  | 10.237141000 | 9.655911000  | 2.690780000  |
| 1  | 11.276518000 | 9.362965000  | 2.571726000  |
| 6  | 9.397696000  | 9.772716000  | 1.588813000  |
| 1  | 9.773543000  | 9.555255000  | 0.594023000  |
| 6  | 8.080406000  | 10.184871000 | 1.777262000  |
| 1  | 7.414634000  | 10.284901000 | 0.924993000  |
| 6  | 7.609805000  | 10.468921000 | 3.056418000  |
| 1  | 6.577862000  | 10.781908000 | 3.191357000  |
| 6  | 8.423579000  | 10.352634000 | 4.188666000  |
| 6  | 7.888464000  | 10.651993000 | 5.558730000  |
| 1  | 8.227864000  | 9.927335000  | 6.305077000  |
| 1  | 6.796030000  | 10.646986000 | 5.546398000  |
| 1  | 8.222437000  | 11.634620000 | 5.906425000  |
| 17 | 10.356531000 | 9.869514000  | 9.501862000  |
| 7  | 11.674001000 | 10.338557000 | 6.809124000  |
| 7  | 10.870670000 | 10.796186000 | 5.903854000  |
| 7  | 10.631525000 | 9.782664000  | 5.070726000  |
| 7  | 13.224989000 | 9.133368000  | 8.571707000  |
| 8  | 13.239650000 | 11.790026000 | 11.555915000 |
| 8  | 10.727148000 | 13.765829000 | 8.571774000  |
| 8  | 14.810281000 | 12.549279000 | 7.530048000  |
| 75 | 12.338723000 | 11.152442000 | 8.689074000  |

**Table S34.** Cartesian coordinates of **Re-Tol** in  $T_1$  (in gas phase).

|    |              |              |              |
|----|--------------|--------------|--------------|
| 6  | 12.860462000 | 11.534788000 | 10.505170000 |
| 6  | 11.397814000 | 12.843258000 | 8.488171000  |
| 6  | 13.905994000 | 11.860078000 | 7.980879000  |
| 6  | 11.297612000 | 8.655711000  | 5.425523000  |
| 1  | 11.254327000 | 7.756325000  | 4.833414000  |
| 6  | 11.957756000 | 8.992916000  | 6.601875000  |
| 6  | 12.835807000 | 8.370333000  | 7.525862000  |
| 6  | 13.321313000 | 7.060672000  | 7.427546000  |
| 1  | 13.006609000 | 6.450607000  | 6.584982000  |
| 6  | 14.186256000 | 6.557318000  | 8.373838000  |
| 1  | 14.567090000 | 5.544776000  | 8.298351000  |
| 6  | 14.577624000 | 7.411351000  | 9.458628000  |
| 1  | 15.265031000 | 7.067954000  | 10.223321000 |
| 6  | 14.070304000 | 8.674064000  | 9.533955000  |
| 1  | 14.343059000 | 9.333839000  | 10.350670000 |
| 6  | 9.720051000  | 9.935350000  | 3.978980000  |
| 6  | 10.265134000 | 9.730607000  | 2.713212000  |
| 1  | 11.319338000 | 9.485733000  | 2.620074000  |
| 6  | 9.459184000  | 9.862043000  | 1.587893000  |
| 1  | 9.878550000  | 9.707266000  | 0.598671000  |
| 6  | 8.118496000  | 10.205455000 | 1.745881000  |
| 1  | 7.478041000  | 10.314884000 | 0.875498000  |
| 6  | 7.592235000  | 10.405714000 | 3.019276000  |
| 1  | 6.542189000  | 10.662930000 | 3.131558000  |
| 6  | 8.372723000  | 10.271662000 | 4.172575000  |
| 6  | 7.776396000  | 10.473712000 | 5.535252000  |
| 1  | 8.122407000  | 9.720285000  | 6.249248000  |
| 1  | 6.686124000  | 10.423514000 | 5.481950000  |
| 1  | 8.056182000  | 11.447211000 | 5.949356000  |
| 17 | 10.168674000 | 10.280535000 | 9.597724000  |
| 7  | 11.569391000 | 10.282143000 | 6.879343000  |
| 7  | 10.744144000 | 10.744499000 | 5.979834000  |
| 7  | 10.577570000 | 9.764211000  | 5.106928000  |
| 7  | 13.185166000 | 9.194917000  | 8.625603000  |
| 8  | 13.202866000 | 11.794136000 | 11.575124000 |
| 8  | 10.890395000 | 13.858392000 | 8.320964000  |
| 8  | 14.865364000 | 12.337789000 | 7.562089000  |
| 75 | 12.277852000 | 11.077970000 | 8.721998000  |

**Table S35.** Cartesian coordinates of **Re-Tol** in  $S_0$  (in dichloromethane).

|    |              |              |              |
|----|--------------|--------------|--------------|
| 6  | 13.618023000 | 12.009640000 | 10.070423000 |
| 6  | 12.122261000 | 13.209652000 | 8.176046000  |
| 6  | 14.295154000 | 11.768919000 | 7.460093000  |
| 6  | 10.988294000 | 8.752435000  | 5.695705000  |
| 1  | 10.763264000 | 7.795208000  | 5.252435000  |
| 6  | 11.755014000 | 9.130477000  | 6.774360000  |
| 6  | 12.557832000 | 8.439089000  | 7.768206000  |
| 6  | 12.711805000 | 7.056313000  | 7.811690000  |
| 1  | 12.212095000 | 6.431714000  | 7.079491000  |
| 6  | 13.509607000 | 6.500587000  | 8.803686000  |
| 1  | 13.644523000 | 5.425256000  | 8.859335000  |
| 6  | 14.129810000 | 7.344577000  | 9.720494000  |
| 1  | 14.761413000 | 6.957167000  | 10.511834000 |
| 6  | 13.928966000 | 8.714025000  | 9.614278000  |
| 1  | 14.394199000 | 9.401660000  | 10.310793000 |
| 6  | 9.686149000  | 10.113308000 | 4.045486000  |
| 6  | 10.213391000 | 10.852912000 | 2.989042000  |
| 1  | 11.223297000 | 11.244121000 | 3.062171000  |
| 6  | 9.435912000  | 11.073143000 | 1.857635000  |
| 1  | 9.836419000  | 11.647995000 | 1.028705000  |
| 6  | 8.146265000  | 10.546435000 | 1.800262000  |
| 1  | 7.530290000  | 10.710800000 | 0.921030000  |
| 6  | 7.636847000  | 9.816125000  | 2.871075000  |
| 1  | 6.624042000  | 9.425365000  | 2.821977000  |
| 6  | 8.389273000  | 9.583334000  | 4.028127000  |
| 6  | 7.808877000  | 8.815437000  | 5.181458000  |
| 1  | 8.141607000  | 7.771234000  | 5.179983000  |
| 1  | 6.718518000  | 8.808798000  | 5.117980000  |
| 1  | 8.091183000  | 9.250234000  | 6.144774000  |
| 17 | 10.644340000 | 10.817761000 | 9.761214000  |
| 7  | 11.695523000 | 10.488504000 | 6.838527000  |
| 7  | 10.950368000 | 10.967636000 | 5.891289000  |
| 7  | 10.517644000 | 9.916471000  | 5.194056000  |
| 7  | 13.160909000 | 9.260750000  | 8.660643000  |
| 8  | 14.149164000 | 12.357900000 | 11.040393000 |
| 8  | 11.736773000 | 14.284521000 | 7.980718000  |
| 8  | 15.254200000 | 11.982975000 | 6.837709000  |
| 75 | 12.732280000 | 11.422470000 | 8.478095000  |

**Table S36.** Cartesian coordinates of **Re-Tol** in  $S_1$  (in dichloromethane).

|    |              |              |              |
|----|--------------|--------------|--------------|
| 6  | 13.651215000 | 12.102651000 | 10.018805000 |
| 6  | 12.114538000 | 13.216684000 | 8.175918000  |
| 6  | 14.273961000 | 11.549407000 | 7.375477000  |
| 6  | 10.981647000 | 8.757137000  | 5.680613000  |
| 1  | 10.775087000 | 7.818477000  | 5.193019000  |
| 6  | 11.746107000 | 9.099786000  | 6.792597000  |
| 6  | 12.538229000 | 8.430808000  | 7.756578000  |
| 6  | 12.760615000 | 7.040656000  | 7.807000000  |
| 1  | 12.301467000 | 6.409179000  | 7.051656000  |
| 6  | 13.544491000 | 6.497086000  | 8.795764000  |
| 1  | 13.718808000 | 5.427325000  | 8.839248000  |
| 6  | 14.123893000 | 7.371448000  | 9.765284000  |
| 1  | 14.745169000 | 6.993238000  | 10.568847000 |
| 6  | 13.881797000 | 8.718920000  | 9.674917000  |
| 1  | 14.307731000 | 9.403928000  | 10.401179000 |
| 6  | 9.670809000  | 10.137049000 | 4.066225000  |
| 6  | 10.190479000 | 10.920412000 | 3.037711000  |
| 1  | 11.186560000 | 11.339499000 | 3.139683000  |
| 6  | 9.426003000  | 11.147548000 | 1.898802000  |
| 1  | 9.822635000  | 11.756076000 | 1.092206000  |
| 6  | 8.154195000  | 10.584103000 | 1.804847000  |
| 1  | 7.547789000  | 10.753370000 | 0.919841000  |
| 6  | 7.650745000  | 9.810299000  | 2.847476000  |
| 1  | 6.651032000  | 9.390877000  | 2.771402000  |
| 6  | 8.391417000  | 9.568669000  | 4.010506000  |
| 6  | 7.813247000  | 8.753325000  | 5.131948000  |
| 1  | 8.161504000  | 7.714918000  | 5.096430000  |
| 1  | 6.723334000  | 8.734640000  | 5.059846000  |
| 1  | 8.084878000  | 9.157028000  | 6.111470000  |
| 17 | 10.747393000 | 10.954263000 | 9.885635000  |
| 7  | 11.640557000 | 10.473036000 | 6.891191000  |
| 7  | 10.882170000 | 10.972979000 | 5.935610000  |
| 7  | 10.492996000 | 9.932294000  | 5.219353000  |
| 7  | 13.113020000 | 9.283800000  | 8.711396000  |
| 8  | 14.221375000 | 12.557270000 | 10.908342000 |
| 8  | 11.785807000 | 14.303801000 | 7.989907000  |
| 8  | 15.217045000 | 11.637800000 | 6.727483000  |
| 75 | 12.675787000 | 11.375160000 | 8.487009000  |

**Table S37.** Cartesian coordinates of **Re-Tol** in  $T_1$  (in dichloromethane).

|    |              |              |              |
|----|--------------|--------------|--------------|
| 6  | 13.521591000 | 11.918363000 | 10.146552000 |
| 6  | 12.160233000 | 13.201678000 | 8.064156000  |
| 6  | 14.347095000 | 11.627197000 | 7.549222000  |
| 6  | 10.982596000 | 8.740804000  | 5.666268000  |
| 1  | 10.778062000 | 7.799211000  | 5.182941000  |
| 6  | 11.748451000 | 9.091797000  | 6.770798000  |
| 6  | 12.541772000 | 8.429341000  | 7.746158000  |
| 6  | 12.724578000 | 7.047466000  | 7.840493000  |
| 1  | 12.213225000 | 6.404975000  | 7.129130000  |
| 6  | 13.547085000 | 6.510390000  | 8.810791000  |
| 1  | 13.695590000 | 5.438975000  | 8.886022000  |
| 6  | 14.217181000 | 7.412337000  | 9.707997000  |
| 1  | 14.891253000 | 7.041908000  | 10.472423000 |
| 6  | 14.003564000 | 8.752491000  | 9.602141000  |
| 1  | 14.495564000 | 9.449349000  | 10.271586000 |
| 6  | 9.664345000  | 10.124491000 | 4.055235000  |
| 6  | 10.186078000 | 10.887955000 | 3.013073000  |
| 1  | 11.191234000 | 11.288985000 | 3.097907000  |
| 6  | 9.411470000  | 11.118603000 | 1.881441000  |
| 1  | 9.809110000  | 11.712018000 | 1.064171000  |
| 6  | 8.128711000  | 10.577339000 | 1.808294000  |
| 1  | 7.514937000  | 10.748951000 | 0.928844000  |
| 6  | 7.623952000  | 9.822088000  | 2.864059000  |
| 1  | 6.616500000  | 9.419116000  | 2.803234000  |
| 6  | 8.374375000  | 9.578465000  | 4.020293000  |
| 6  | 7.798527000  | 8.782967000  | 5.157049000  |
| 1  | 8.146847000  | 7.744146000  | 5.139403000  |
| 1  | 6.708484000  | 8.763191000  | 5.088546000  |
| 1  | 8.072952000  | 9.204445000  | 6.128447000  |
| 17 | 10.517655000 | 11.131406000 | 9.662361000  |
| 7  | 11.654172000 | 10.457112000 | 6.865298000  |
| 7  | 10.897753000 | 10.954182000 | 5.921485000  |
| 7  | 10.493986000 | 9.915135000  | 5.202129000  |
| 7  | 13.153178000 | 9.317098000  | 8.676821000  |
| 8  | 14.013713000 | 12.266931000 | 11.130741000 |
| 8  | 11.854222000 | 14.269663000 | 7.778144000  |
| 8  | 15.336596000 | 11.810917000 | 6.993981000  |
| 75 | 12.678894000 | 11.333460000 | 8.513584000  |

**Table S38.** Cartesian coordinates of **Re-T-Tol** in  $S_0$  (in gas phase).

|    |              |             |              |
|----|--------------|-------------|--------------|
| 75 | 8.774905000  | 3.287469000 | 6.249532000  |
| 17 | 10.934294000 | 2.184629000 | 5.566787000  |
| 8  | 6.286507000  | 4.808547000 | 7.191852000  |
| 8  | 7.485324000  | 2.891832000 | 3.491882000  |
| 8  | 7.629047000  | 0.551772000 | 7.166335000  |
| 7  | 10.280172000 | 5.898992000 | 4.905773000  |
| 7  | 11.207000000 | 6.784656000 | 5.253673000  |
| 7  | 11.467924000 | 6.507011000 | 6.506663000  |
| 7  | 9.872840000  | 3.672771000 | 8.161490000  |
| 6  | 7.225865000  | 4.221677000 | 6.832479000  |
| 6  | 7.977921000  | 3.045561000 | 4.528523000  |
| 6  | 8.046672000  | 1.570695000 | 6.811957000  |
| 6  | 9.918005000  | 5.037436000 | 5.895138000  |
| 6  | 12.480063000 | 7.300987000 | 7.176793000  |
| 1  | 12.853036000 | 8.027045000 | 6.455542000  |
| 1  | 13.297713000 | 6.654563000 | 7.503520000  |
| 1  | 12.042340000 | 7.821063000 | 8.031892000  |
| 6  | 10.725007000 | 5.458744000 | 6.952528000  |
| 6  | 10.714695000 | 4.739226000 | 8.209763000  |
| 6  | 11.449980000 | 5.039408000 | 9.356981000  |
| 1  | 12.108516000 | 5.898736000 | 9.382567000  |
| 6  | 11.330603000 | 4.220698000 | 10.473203000 |
| 1  | 11.897935000 | 4.437922000 | 11.373077000 |
| 6  | 10.478929000 | 3.124015000 | 10.415125000 |
| 1  | 10.357120000 | 2.452050000 | 11.257386000 |
| 6  | 9.771839000  | 2.891222000 | 9.241592000  |
| 1  | 9.098393000  | 2.046222000 | 9.154692000  |
| 6  | 9.852049000  | 5.876419000 | 3.535884000  |
| 6  | 9.118859000  | 6.949812000 | 3.018452000  |
| 6  | 8.748308000  | 6.860122000 | 1.673860000  |
| 1  | 8.170656000  | 7.670165000 | 1.235974000  |
| 6  | 9.088327000  | 5.755023000 | 0.896685000  |
| 1  | 8.776934000  | 5.714517000 | -0.143206000 |
| 6  | 9.807525000  | 4.698981000 | 1.450472000  |
| 1  | 10.056975000 | 3.826615000 | 0.854976000  |
| 6  | 10.195220000 | 4.757059000 | 2.784795000  |
| 1  | 10.735734000 | 3.940928000 | 3.259707000  |
| 6  | 8.730381000  | 8.132652000 | 3.858560000  |
| 1  | 8.294544000  | 7.818606000 | 4.813060000  |
| 1  | 7.990655000  | 8.744188000 | 3.336562000  |
| 1  | 9.595214000  | 8.765686000 | 4.084214000  |

**Table S39.** Cartesian coordinates of **Re-T-Tol** in T<sub>1</sub> (in gas phase).

|    |              |             |              |
|----|--------------|-------------|--------------|
| 75 | 8.854317000  | 3.317334000 | 6.235429000  |
| 17 | 10.546760000 | 1.657663000 | 5.726218000  |
| 8  | 6.650238000  | 5.341994000 | 7.031812000  |
| 8  | 7.576518000  | 2.950941000 | 3.455107000  |
| 8  | 7.022022000  | 0.986453000 | 7.324348000  |
| 7  | 10.271168000 | 5.902035000 | 4.914229000  |
| 7  | 11.111042000 | 6.895519000 | 5.274490000  |
| 7  | 11.337737000 | 6.654090000 | 6.609470000  |
| 7  | 9.948402000  | 3.594392000 | 8.122363000  |
| 6  | 7.470894000  | 4.584937000 | 6.742115000  |
| 6  | 8.063882000  | 3.102589000 | 4.488964000  |
| 6  | 7.704321000  | 1.818385000 | 6.926856000  |
| 6  | 10.010265000 | 4.995889000 | 5.879387000  |
| 6  | 12.403200000 | 7.396196000 | 7.230037000  |
| 1  | 12.638616000 | 8.236860000 | 6.576450000  |
| 1  | 13.303600000 | 6.780936000 | 7.355555000  |
| 1  | 12.085740000 | 7.785936000 | 8.201211000  |
| 6  | 10.738388000 | 5.471412000 | 7.000305000  |
| 6  | 10.741609000 | 4.732926000 | 8.197761000  |
| 6  | 11.461583000 | 5.017443000 | 9.385422000  |
| 1  | 12.066500000 | 5.914135000 | 9.446375000  |
| 6  | 11.400917000 | 4.147183000 | 10.448738000 |
| 1  | 11.954615000 | 4.359847000 | 11.358445000 |
| 6  | 10.624920000 | 2.977555000 | 10.342399000 |
| 1  | 10.562391000 | 2.256368000 | 11.148627000 |
| 6  | 9.926266000  | 2.759145000 | 9.164139000  |
| 1  | 9.319386000  | 1.867629000 | 9.044384000  |
| 6  | 9.867811000  | 5.849211000 | 3.544895000  |
| 6  | 9.056218000  | 6.862908000 | 3.018519000  |
| 6  | 8.708193000  | 6.754549000 | 1.669163000  |
| 1  | 8.072157000  | 7.519844000 | 1.231367000  |
| 6  | 9.145091000  | 5.689219000 | 0.884778000  |
| 1  | 8.850459000  | 5.633701000 | -0.159300000 |
| 6  | 9.947743000  | 4.694822000 | 1.437613000  |
| 1  | 10.284456000 | 3.856838000 | 0.835325000  |
| 6  | 10.314876000 | 4.777582000 | 2.776411000  |
| 1  | 10.935222000 | 4.014809000 | 3.238489000  |
| 6  | 8.568640000  | 8.007755000 | 3.858354000  |
| 1  | 8.156596000  | 7.657559000 | 4.810714000  |
| 1  | 7.787474000  | 8.562672000 | 3.332953000  |
| 1  | 9.383792000  | 8.698460000 | 4.096824000  |

**Table S40.** Cartesian coordinates of **Re-T-Tol** in S<sub>0</sub> (in dichloromethane).

|    |              |             |              |
|----|--------------|-------------|--------------|
| 75 | 8.755899000  | 3.376530000 | 6.241211000  |
| 17 | 10.792157000 | 1.930095000 | 5.748778000  |
| 8  | 6.405664000  | 5.197047000 | 6.960350000  |
| 8  | 7.606127000  | 2.985589000 | 3.423619000  |
| 8  | 7.224411000  | 0.858226000 | 7.221671000  |
| 7  | 10.476785000 | 5.812646000 | 4.827762000  |
| 7  | 11.443166000 | 6.658264000 | 5.166122000  |
| 7  | 11.684380000 | 6.395699000 | 6.424479000  |
| 7  | 9.825367000  | 3.774503000 | 8.168707000  |
| 6  | 7.300575000  | 4.501468000 | 6.686321000  |
| 6  | 8.040002000  | 3.132994000 | 4.490853000  |
| 6  | 7.795389000  | 1.798675000 | 6.858787000  |
| 6  | 10.069007000 | 4.995437000 | 5.832490000  |
| 6  | 12.717186000 | 7.166746000 | 7.098905000  |
| 1  | 13.122854000 | 7.870542000 | 6.374386000  |
| 1  | 13.506817000 | 6.497759000 | 7.444719000  |
| 1  | 12.279212000 | 7.711052000 | 7.937139000  |
| 6  | 10.884957000 | 5.397605000 | 6.886287000  |
| 6  | 10.777410000 | 4.747206000 | 8.179034000  |
| 6  | 11.518013000 | 5.033624000 | 9.324036000  |
| 1  | 12.272184000 | 5.809741000 | 9.315738000  |
| 6  | 11.278795000 | 4.307270000 | 10.485187000 |
| 1  | 11.847824000 | 4.517609000 | 11.385036000 |
| 6  | 10.305421000 | 3.315573000 | 10.472481000 |
| 1  | 10.082987000 | 2.723826000 | 11.353102000 |
| 6  | 9.606026000  | 3.084089000 | 9.294177000  |
| 1  | 8.840237000  | 2.318881000 | 9.245946000  |
| 6  | 9.992798000  | 5.844649000 | 3.475616000  |
| 6  | 8.939478000  | 6.707793000 | 3.152451000  |
| 6  | 8.502266000  | 6.691564000 | 1.824007000  |
| 1  | 7.685111000  | 7.346738000 | 1.534081000  |
| 6  | 9.090194000  | 5.857883000 | 0.874185000  |
| 1  | 8.725625000  | 5.869623000 | -0.148909000 |
| 6  | 10.138928000 | 5.011792000 | 1.230333000  |
| 1  | 10.597992000 | 4.359927000 | 0.493787000  |
| 6  | 10.594470000 | 5.003996000 | 2.545476000  |
| 1  | 11.404292000 | 4.351362000 | 2.857022000  |
| 6  | 8.309730000  | 7.604531000 | 4.178083000  |
| 1  | 7.876358000  | 7.025434000 | 5.000375000  |
| 1  | 7.513837000  | 8.201837000 | 3.728364000  |
| 1  | 9.044090000  | 8.289897000 | 4.614548000  |

**Table S41.** Cartesian coordinates of **Re-T-Tol** in S<sub>1</sub> (in dichloromethane).

|    |              |             |              |
|----|--------------|-------------|--------------|
| 75 | 8.888163000  | 3.275707000 | 6.226599000  |
| 17 | 10.743200000 | 1.820798000 | 5.679127000  |
| 8  | 6.693447000  | 5.318310000 | 7.007223000  |
| 8  | 7.604389000  | 2.802672000 | 3.458049000  |
| 8  | 7.058458000  | 0.897371000 | 7.163551000  |
| 7  | 10.404838000 | 5.837594000 | 4.860198000  |
| 7  | 11.281852000 | 6.773473000 | 5.201617000  |
| 7  | 11.544782000 | 6.509709000 | 6.491581000  |
| 7  | 9.907537000  | 3.626965000 | 8.118115000  |
| 6  | 7.499279000  | 4.551050000 | 6.716897000  |
| 6  | 8.095485000  | 2.991665000 | 4.485295000  |
| 6  | 7.754123000  | 1.752297000 | 6.840393000  |
| 6  | 10.086664000 | 4.972231000 | 5.840961000  |
| 6  | 12.482696000 | 7.356781000 | 7.188562000  |
| 1  | 12.825181000 | 8.118664000 | 6.489262000  |
| 1  | 13.339511000 | 6.771453000 | 7.533592000  |
| 1  | 11.997434000 | 7.840121000 | 8.041076000  |
| 6  | 10.843312000 | 5.416574000 | 6.939684000  |
| 6  | 10.777053000 | 4.728866000 | 8.173463000  |
| 6  | 11.471611000 | 5.025880000 | 9.369587000  |
| 1  | 12.137598000 | 5.880760000 | 9.403130000  |
| 6  | 11.308587000 | 4.238033000 | 10.482381000 |
| 1  | 11.843290000 | 4.466220000 | 11.398705000 |
| 6  | 10.431271000 | 3.120227000 | 10.412964000 |
| 1  | 10.273653000 | 2.465589000 | 11.262014000 |
| 6  | 9.773209000  | 2.874379000 | 9.229854000  |
| 1  | 9.099254000  | 2.027628000 | 9.148196000  |
| 6  | 9.925821000  | 5.832787000 | 3.508847000  |
| 6  | 9.033022000  | 6.826927000 | 3.090141000  |
| 6  | 8.604475000  | 6.764178000 | 1.759838000  |
| 1  | 7.905276000  | 7.514723000 | 1.400433000  |
| 6  | 9.047026000  | 5.763449000 | 0.896485000  |
| 1  | 8.692214000  | 5.744138000 | -0.129978000 |
| 6  | 9.934923000  | 4.787999000 | 1.346119000  |
| 1  | 10.279227000 | 4.003719000 | 0.679259000  |
| 6  | 10.378360000 | 4.823426000 | 2.664671000  |
| 1  | 11.066424000 | 4.075993000 | 3.048269000  |
| 6  | 8.552765000  | 7.908561000 | 4.013823000  |
| 1  | 8.262805000  | 7.505309000 | 4.989335000  |
| 1  | 7.688975000  | 8.421707000 | 3.585047000  |
| 1  | 9.336831000  | 8.651788000 | 4.192380000  |



**Table S42.** Cartesian coordinates of **Re-T-Tol** in  $T_1$  (in dichloromethane).

|    |              |             |              |
|----|--------------|-------------|--------------|
| 75 | 8.843212000  | 3.348455000 | 6.235535000  |
| 17 | 10.574252000 | 1.649765000 | 5.741706000  |
| 8  | 6.641786000  | 5.358045000 | 7.041987000  |
| 8  | 7.581041000  | 3.017877000 | 3.447354000  |
| 8  | 7.017050000  | 0.976297000 | 7.250375000  |
| 7  | 10.339546000 | 5.852341000 | 4.881045000  |
| 7  | 11.215753000 | 6.820434000 | 5.228729000  |
| 7  | 11.452088000 | 6.585591000 | 6.560614000  |
| 7  | 9.918677000  | 3.628454000 | 8.131342000  |
| 6  | 7.465325000  | 4.607163000 | 6.742244000  |
| 6  | 8.063761000  | 3.152558000 | 4.489463000  |
| 6  | 7.696079000  | 1.828745000 | 6.893004000  |
| 6  | 10.044538000 | 4.973253000 | 5.857514000  |
| 6  | 12.471708000 | 7.371447000 | 7.209284000  |
| 1  | 12.727897000 | 8.193519000 | 6.540885000  |
| 1  | 13.371328000 | 6.776139000 | 7.402366000  |
| 1  | 12.094531000 | 7.788411000 | 8.146567000  |
| 6  | 10.801978000 | 5.442431000 | 6.976757000  |
| 6  | 10.769936000 | 4.731520000 | 8.184566000  |
| 6  | 11.499610000 | 5.013475000 | 9.369756000  |
| 1  | 12.153231000 | 5.876270000 | 9.407682000  |
| 6  | 11.380029000 | 4.183650000 | 10.459331000 |
| 1  | 11.938193000 | 4.392271000 | 11.366764000 |
| 6  | 10.531846000 | 3.060765000 | 10.383607000 |
| 1  | 10.413241000 | 2.376915000 | 11.215720000 |
| 6  | 9.831763000  | 2.838652000 | 9.204838000  |
| 1  | 9.168987000  | 1.984320000 | 9.117153000  |
| 6  | 9.906407000  | 5.823978000 | 3.517901000  |
| 6  | 9.012820000  | 6.800108000 | 3.057166000  |
| 6  | 8.635505000  | 6.723813000 | 1.712332000  |
| 1  | 7.937384000  | 7.460188000 | 1.322637000  |
| 6  | 9.127508000  | 5.726689000 | 0.871448000  |
| 1  | 8.812062000  | 5.696300000 | -0.167546000 |
| 6  | 10.016322000 | 4.770578000 | 1.359269000  |
| 1  | 10.400846000 | 3.990423000 | 0.709667000  |
| 6  | 10.410039000 | 4.821724000 | 2.692994000  |
| 1  | 11.099997000 | 4.090764000 | 3.104122000  |
| 6  | 8.479660000  | 7.876322000 | 3.957521000  |
| 1  | 8.108942000  | 7.462400000 | 4.900802000  |
| 1  | 7.659848000  | 8.410822000 | 3.472411000  |
| 1  | 9.259298000  | 8.602850000 | 4.209825000  |

**Table S43.** Cartesian coordinates of **Re-T-BOP** in  $S_0$  (in gas phase).

|    |              |              |              |
|----|--------------|--------------|--------------|
| 6  | 5.251086000  | -0.745637000 | 16.927207000 |
| 6  | 3.576671000  | -0.172089000 | 14.862907000 |
| 6  | 4.412179000  | 1.861993000  | 16.473624000 |
| 6  | 7.649094000  | 2.161191000  | 16.707102000 |
| 1  | 6.824093000  | 2.517915000  | 17.313227000 |
| 6  | 8.923572000  | 2.696714000  | 16.847354000 |
| 1  | 9.099111000  | 3.481427000  | 17.574784000 |
| 6  | 9.943300000  | 2.209671000  | 16.038191000 |
| 1  | 10.951662000 | 2.604689000  | 16.115239000 |
| 6  | 9.654547000  | 1.204639000  | 15.123538000 |
| 1  | 10.436358000 | 0.810578000  | 14.486295000 |
| 6  | 8.350831000  | 0.715455000  | 15.037693000 |
| 6  | 7.868363000  | -0.335160000 | 14.164349000 |
| 7  | 7.642733000  | -1.896175000 | 12.618394000 |
| 7  | 7.356360000  | 1.194559000  | 15.831043000 |
| 6  | 6.537343000  | -0.748239000 | 14.229666000 |
| 7  | 6.496232000  | -1.708805000 | 13.264713000 |
| 7  | 8.469950000  | -1.045555000 | 13.174459000 |
| 8  | 5.234548000  | -1.492996000 | 17.821327000 |
| 8  | 2.542488000  | -0.537008000 | 14.493031000 |
| 8  | 3.914580000  | 2.709126000  | 17.083340000 |
| 17 | 5.486803000  | 2.005208000  | 13.482812000 |
| 75 | 5.286583000  | 0.451707000  | 15.452272000 |
| 6  | 5.075719000  | -2.618039000 | 11.523155000 |
| 6  | 3.993000000  | -3.427503000 | 11.242318000 |
| 6  | 3.236104000  | -4.094587000 | 12.213705000 |
| 6  | 3.563061000  | -3.961547000 | 13.563178000 |
| 6  | 4.651197000  | -3.160728000 | 13.884437000 |
| 6  | 5.378999000  | -2.509342000 | 12.878904000 |
| 8  | 3.455175000  | -3.724012000 | 10.029064000 |
| 6  | 2.403779000  | -4.554626000 | 10.318654000 |
| 7  | 2.233274000  | -4.804295000 | 11.580860000 |
| 1  | 5.640650000  | -2.090827000 | 10.763602000 |
| 1  | 2.986424000  | -4.463588000 | 14.332178000 |
| 1  | 4.946434000  | -3.021465000 | 14.919016000 |
| 6  | 1.615072000  | -5.052759000 | 9.201726000  |
| 6  | 1.917543000  | -4.690993000 | 7.883021000  |
| 6  | 0.535658000  | -5.907924000 | 9.462145000  |
| 6  | 1.144970000  | -5.183021000 | 6.836060000  |
| 6  | -0.230257000 | -6.394643000 | 8.410518000  |
| 6  | 0.071882000  | -6.034288000 | 7.096226000  |
| 1  | 2.752144000  | -4.026248000 | 7.684629000  |
| 1  | 0.313937000  | -6.175979000 | 10.490384000 |
| 1  | 1.380470000  | -4.899781000 | 5.814358000  |
| 1  | -1.066889000 | -7.056318000 | 8.615024000  |
| 1  | -0.529835000 | -6.415830000 | 6.276177000  |
| 6  | 9.822315000  | -0.982642000 | 12.654220000 |
| 1  | 10.535981000 | -1.261388000 | 13.432816000 |
| 1  | 9.885891000  | -1.690298000 | 11.828636000 |
| 1  | 10.029515000 | 0.026887000  | 12.292010000 |

**Table S44.** Cartesian coordinates of **Re-T-BOP** in  $T_1$  (in gas phase).

|    |              |              |              |
|----|--------------|--------------|--------------|
| 6  | 5.434461000  | -0.864095000 | 16.693846000 |
| 6  | 3.615848000  | -0.250241000 | 14.665491000 |
| 6  | 4.329006000  | 1.681208000  | 16.555792000 |
| 6  | 7.532140000  | 2.406028000  | 16.411156000 |
| 1  | 6.671639000  | 2.861913000  | 16.889631000 |
| 6  | 8.795828000  | 2.951085000  | 16.581505000 |
| 1  | 8.924678000  | 3.832520000  | 17.198325000 |
| 6  | 9.880410000  | 2.331717000  | 15.932421000 |
| 1  | 10.886472000 | 2.725275000  | 16.043116000 |
| 6  | 9.655363000  | 1.224109000  | 15.148633000 |
| 1  | 10.478040000 | 0.740796000  | 14.635409000 |
| 6  | 8.340927000  | 0.714203000  | 15.006628000 |
| 6  | 7.932341000  | -0.389592000 | 14.234364000 |
| 7  | 7.738121000  | -2.163386000 | 12.832120000 |
| 7  | 7.283586000  | 1.322697000  | 15.670122000 |
| 6  | 6.567115000  | -0.762769000 | 14.196944000 |
| 7  | 6.545462000  | -1.835324000 | 13.375360000 |
| 7  | 8.606288000  | -1.266880000 | 13.407059000 |
| 8  | 5.506528000  | -1.661781000 | 17.524855000 |
| 8  | 2.602767000  | -0.640824000 | 14.279253000 |
| 8  | 3.770956000  | 2.347481000  | 17.304158000 |
| 17 | 5.123134000  | 2.240694000  | 13.643309000 |
| 75 | 5.299720000  | 0.462603000  | 15.281876000 |
| 6  | 5.101383000  | -2.667825000 | 11.619448000 |
| 6  | 4.007177000  | -3.452685000 | 11.314657000 |
| 6  | 3.251078000  | -4.152658000 | 12.263615000 |
| 6  | 3.597126000  | -4.086451000 | 13.612747000 |
| 6  | 4.698140000  | -3.310511000 | 13.954531000 |
| 6  | 5.419742000  | -2.610218000 | 12.975942000 |
| 8  | 3.455877000  | -3.694437000 | 10.094466000 |
| 6  | 2.398499000  | -4.525447000 | 10.358454000 |
| 7  | 2.235315000  | -4.825672000 | 11.610545000 |
| 1  | 5.675293000  | -2.125802000 | 10.877020000 |
| 1  | 3.030768000  | -4.627006000 | 14.363364000 |
| 1  | 5.019855000  | -3.244098000 | 14.988474000 |
| 6  | 1.595132000  | -4.967782000 | 9.228301000  |
| 6  | 1.892257000  | -4.555222000 | 7.923351000  |
| 6  | 0.507473000  | -5.820491000 | 9.461002000  |
| 6  | 1.106043000  | -4.993863000 | 6.862838000  |
| 6  | -0.272074000 | -6.253772000 | 8.396069000  |
| 6  | 0.024492000  | -5.842321000 | 7.095546000  |
| 1  | 2.734175000  | -3.893697000 | 7.746268000  |
| 1  | 0.290663000  | -6.129392000 | 10.478785000 |
| 1  | 1.338062000  | -4.671565000 | 5.851955000  |
| 1  | -1.114755000 | -6.914051000 | 8.579313000  |
| 1  | -0.587603000 | -6.182428000 | 6.265004000  |
| 6  | 9.927517000  | -1.178440000 | 12.844727000 |
| 1  | 10.691128000 | -1.277159000 | 13.622253000 |
| 1  | 10.037599000 | -2.004898000 | 12.141820000 |
| 1  | 10.069508000 | -0.232118000 | 12.307725000 |

**Table S45.** Cartesian coordinates of Re-T-BOP in  $S_0$  (in dichloromethane).

|    |              |              |              |
|----|--------------|--------------|--------------|
| 6  | 5.336195000  | -0.728296000 | 16.894316000 |
| 6  | 3.568830000  | -0.222218000 | 14.908183000 |
| 6  | 4.374657000  | 1.822253000  | 16.505794000 |
| 6  | 7.617251000  | 2.257179000  | 16.609360000 |
| 1  | 6.790315000  | 2.637635000  | 17.197376000 |
| 6  | 8.892893000  | 2.789679000  | 16.750221000 |
| 1  | 9.063102000  | 3.594184000  | 17.456572000 |
| 6  | 9.920580000  | 2.271169000  | 15.971701000 |
| 1  | 10.929973000 | 2.661984000  | 16.049930000 |
| 6  | 9.640891000  | 1.236769000  | 15.085822000 |
| 1  | 10.430208000 | 0.819619000  | 14.474333000 |
| 6  | 8.338090000  | 0.749707000  | 15.000333000 |
| 6  | 7.865220000  | -0.329570000 | 14.153036000 |
| 7  | 7.669607000  | -1.967019000 | 12.690973000 |
| 7  | 7.332492000  | 1.262905000  | 15.759603000 |
| 6  | 6.530112000  | -0.722579000 | 14.195471000 |
| 7  | 6.502586000  | -1.727880000 | 13.279426000 |
| 7  | 8.491809000  | -1.104778000 | 13.228793000 |
| 8  | 5.377297000  | -1.470095000 | 17.792856000 |
| 8  | 2.529966000  | -0.622398000 | 14.578552000 |
| 8  | 3.841588000  | 2.627937000  | 17.145249000 |
| 17 | 5.304932000  | 2.072805000  | 13.451838000 |
| 75 | 5.268208000  | 0.469461000  | 15.430033000 |
| 6  | 5.062381000  | -2.606713000 | 11.538958000 |
| 6  | 3.987503000  | -3.426053000 | 11.254107000 |
| 6  | 3.261161000  | -4.136252000 | 12.217741000 |
| 6  | 3.614137000  | -4.044526000 | 13.564655000 |
| 6  | 4.694911000  | -3.233783000 | 13.889631000 |
| 6  | 5.389215000  | -2.535253000 | 12.891978000 |
| 8  | 3.431850000  | -3.695686000 | 10.042551000 |
| 6  | 2.402070000  | -4.552433000 | 10.320710000 |
| 7  | 2.258047000  | -4.843593000 | 11.579549000 |
| 1  | 5.607606000  | -2.053305000 | 10.783097000 |
| 1  | 3.070478000  | -4.588617000 | 14.329452000 |
| 1  | 5.016505000  | -3.135107000 | 14.920875000 |
| 6  | 1.605091000  | -5.028042000 | 9.199445000  |
| 6  | 1.888390000  | -4.619014000 | 7.889257000  |
| 6  | 0.540628000  | -5.908064000 | 9.442211000  |
| 6  | 1.111559000  | -5.088340000 | 6.834347000  |
| 6  | -0.230114000 | -6.371885000 | 8.382876000  |
| 6  | 0.052984000  | -5.963783000 | 7.077553000  |
| 1  | 2.711640000  | -3.937587000 | 7.700459000  |
| 1  | 0.329304000  | -6.218504000 | 10.460594000 |
| 1  | 1.333287000  | -4.769382000 | 5.820296000  |
| 1  | -1.053953000 | -7.053059000 | 8.574136000  |
| 1  | -0.551305000 | -6.327875000 | 6.251673000  |
| 6  | 9.875742000  | -1.110686000 | 12.780839000 |
| 1  | 10.531757000 | -1.344175000 | 13.620855000 |
| 1  | 9.966769000  | -1.881304000 | 12.017529000 |
| 1  | 10.126258000 | -0.138001000 | 12.354444000 |

**Table S46.** Cartesian coordinates of Re-T-BOP in  $S_1$  (in dichloromethane).

|    |              |              |              |
|----|--------------|--------------|--------------|
| 6  | 5.519428000  | -0.752902000 | 16.752121000 |
| 6  | 3.576141000  | -0.267788000 | 14.737101000 |
| 6  | 4.224136000  | 1.692361000  | 16.450462000 |
| 6  | 7.495861000  | 2.393466000  | 16.441318000 |
| 1  | 6.634369000  | 2.821926000  | 16.943491000 |
| 6  | 8.746715000  | 2.935168000  | 16.631114000 |
| 1  | 8.868929000  | 3.791108000  | 17.284308000 |
| 6  | 9.849665000  | 2.348559000  | 15.951611000 |
| 1  | 10.851605000 | 2.746486000  | 16.075945000 |
| 6  | 9.630128000  | 1.266421000  | 15.135063000 |
| 1  | 10.460284000 | 0.803451000  | 14.613699000 |
| 6  | 8.324977000  | 0.745248000  | 14.972489000 |
| 6  | 7.925657000  | -0.359752000 | 14.184675000 |
| 7  | 7.754931000  | -2.107764000 | 12.779032000 |
| 7  | 7.243500000  | 1.335215000  | 15.644338000 |
| 6  | 6.580274000  | -0.767344000 | 14.163253000 |
| 7  | 6.574649000  | -1.812981000 | 13.314639000 |
| 7  | 8.582963000  | -1.195124000 | 13.313485000 |
| 8  | 5.684133000  | -1.482579000 | 17.625600000 |
| 8  | 2.549891000  | -0.685905000 | 14.415613000 |
| 8  | 3.582661000  | 2.343427000  | 17.146122000 |
| 17 | 5.180921000  | 2.044126000  | 13.417725000 |
| 75 | 5.278728000  | 0.482789000  | 15.265479000 |
| 6  | 5.097454000  | -2.635570000 | 11.580422000 |
| 6  | 4.014541000  | -3.442239000 | 11.289918000 |
| 6  | 3.311545000  | -4.190696000 | 12.242294000 |
| 6  | 3.699553000  | -4.154924000 | 13.581795000 |
| 6  | 4.789476000  | -3.356945000 | 13.910719000 |
| 6  | 5.457675000  | -2.614568000 | 12.926623000 |
| 8  | 3.428421000  | -3.664041000 | 10.082655000 |
| 6  | 2.405565000  | -4.531859000 | 10.352314000 |
| 7  | 2.292591000  | -4.872880000 | 11.601632000 |
| 1  | 5.627594000  | -2.053620000 | 10.835382000 |
| 1  | 3.177356000  | -4.733121000 | 14.336511000 |
| 1  | 5.143373000  | -3.310632000 | 14.935196000 |
| 6  | 1.581316000  | -4.964067000 | 9.233180000  |
| 6  | 1.828779000  | -4.499820000 | 7.934261000  |
| 6  | 0.526986000  | -5.858546000 | 9.466708000  |
| 6  | 1.026415000  | -4.928778000 | 6.881344000  |
| 6  | -0.269280000 | -6.281954000 | 8.409431000  |
| 6  | -0.021974000 | -5.818739000 | 7.115342000  |
| 1  | 2.644282000  | -3.807161000 | 7.752864000  |
| 1  | 0.344079000  | -6.211668000 | 10.476637000 |
| 1  | 1.220273000  | -4.567061000 | 5.875949000  |
| 1  | -1.085127000 | -6.974643000 | 8.593552000  |
| 1  | -0.646126000 | -6.151358000 | 6.290942000  |
| 6  | 9.972852000  | -1.220378000 | 12.925828000 |
| 1  | 10.607529000 | -1.435850000 | 13.790019000 |
| 1  | 10.095877000 | -2.007983000 | 12.183304000 |
| 1  | 10.259132000 | -0.261082000 | 12.486081000 |

**Table S47.** Cartesian coordinates of Re-T-BOP in  $T_1$  (in dichloromethane).

|    |              |              |              |
|----|--------------|--------------|--------------|
| 6  | 5.174033000  | -0.464622000 | 16.358441000 |
| 6  | 3.622783000  | -0.656411000 | 14.106798000 |
| 6  | 3.941070000  | 1.802193000  | 15.296595000 |
| 6  | 7.091491000  | 2.750364000  | 15.424442000 |
| 1  | 6.149649000  | 3.284311000  | 15.490559000 |
| 6  | 8.284388000  | 3.397283000  | 15.720346000 |
| 1  | 8.271196000  | 4.439258000  | 16.017415000 |
| 6  | 9.482904000  | 2.666837000  | 15.627882000 |
| 1  | 10.433892000 | 3.136971000  | 15.858286000 |
| 6  | 9.442708000  | 1.348273000  | 15.234911000 |
| 1  | 10.357644000 | 0.776058000  | 15.146556000 |
| 6  | 8.197203000  | 0.743547000  | 14.929195000 |
| 6  | 7.976367000  | -0.565021000 | 14.467159000 |
| 7  | 8.111567000  | -2.673057000 | 13.654059000 |
| 7  | 7.018586000  | 1.470466000  | 15.049774000 |
| 6  | 6.655667000  | -0.977461000 | 14.112824000 |
| 7  | 6.829299000  | -2.233082000 | 13.647563000 |
| 7  | 8.806094000  | -1.648551000 | 14.256459000 |
| 8  | 5.172721000  | -0.962280000 | 17.398833000 |
| 8  | 2.668574000  | -1.244257000 | 13.821383000 |
| 8  | 3.222964000  | 2.598222000  | 15.703047000 |
| 17 | 5.185120000  | 1.563478000  | 12.448959000 |
| 75 | 5.171666000  | 0.364538000  | 14.608932000 |
| 6  | 5.043385000  | -2.598657000 | 12.056893000 |
| 6  | 4.128797000  | -3.504680000 | 11.556062000 |
| 6  | 4.013891000  | -4.830587000 | 11.988351000 |
| 6  | 4.854996000  | -5.309263000 | 12.995115000 |
| 6  | 5.777224000  | -4.421587000 | 13.535033000 |
| 6  | 5.856282000  | -3.096083000 | 13.075432000 |
| 8  | 3.203778000  | -3.312788000 | 10.577146000 |
| 6  | 2.571435000  | -4.520111000 | 10.460758000 |
| 7  | 3.007539000  | -5.444867000 | 11.264133000 |
| 1  | 5.133629000  | -1.580015000 | 11.695247000 |
| 1  | 4.785811000  | -6.332386000 | 13.349194000 |
| 1  | 6.447408000  | -4.739442000 | 14.326758000 |
| 6  | 1.506654000  | -4.626024000 | 9.473862000  |
| 6  | 1.141523000  | -3.524948000 | 8.687274000  |
| 6  | 0.839775000  | -5.849411000 | 9.315003000  |
| 6  | 0.118755000  | -3.650682000 | 7.751891000  |
| 6  | -0.180386000 | -5.966274000 | 8.378450000  |
| 6  | -0.543633000 | -4.868387000 | 7.595289000  |
| 1  | 1.656267000  | -2.577437000 | 8.809798000  |
| 1  | 1.129670000  | -6.696268000 | 9.928991000  |
| 1  | -0.161883000 | -2.795348000 | 7.144485000  |
| 1  | -0.694544000 | -6.915256000 | 8.258120000  |
| 1  | -1.341662000 | -4.962673000 | 6.864458000  |
| 6  | 10.245898000 | -1.726955000 | 14.224852000 |
| 1  | 10.661477000 | -1.438740000 | 15.193017000 |
| 1  | 10.513548000 | -2.765543000 | 14.029496000 |
| 1  | 10.667480000 | -1.095216000 | 13.434066000 |
